# Supplementary material
Source: PubMed Central journal article supplement (PMC6871009)
Supplement: 41592_2013_BFnmeth2722_MOESM257_ESM.pdf [file 41592_2013_BFnmeth2722_MOESM257_ESM.pdf]

# Systematic evaluation of spliced alignment programs for RNA-seq data

Pär G. Engström, Tamara Steijger, Botond Sipos, Gregory R. Grant, André Kahles, RGASP Consortium, Gunnar Rätsch, Nick Goldman, Tim J. Hubbard, Jennifer Harrow, Roderic Guigó and Paul Bertone

## Supplement

### Contents

|                                                                                                 |        |
|-------------------------------------------------------------------------------------------------|--------|
| Supplementary Figure 1. Cumulative distribution of number of alignments per read                | page 2 |
| Supplementary Figure 2. Mismatch frequencies stratified by base caller quality scores           | 3      |
| Supplementary Figure 3. Mapping statistics for high-quality reads from K562 and mouse           | 4      |
| Supplementary Figure 4. Mismatch and truncation frequencies for alignments of simulated data    | 5      |
| Supplementary Figure 5. Indel frequencies for mouse and simulated data                          | 6      |
| Supplementary Figure 6. Examples of mapping results for reads with small insertions             | 7      |
| Supplementary Figure 7. Positional distribution of mismatches and gaps over read sequences      | 8      |
| Supplementary Figure 8. Base call quality score distributions for the RNA-seq data sets         | 9      |
| Supplementary Figure 9. Coverage of annotated genes for K562 whole cell and simulation 1        | 10     |
| Supplementary Figure 10. Coverage of annotated genes for K562 cytoplasmic and nuclear RNA       | 11     |
| Supplementary Figure 11. Coverage of annotated genes for mouse and simulation 2                 | 12     |
| Supplementary Figure 12. Mapping frequency at intronic repeats                                  | 13     |
| Supplementary Figure 13. Size distribution for splices in primary alignments                    | 14     |
| Supplementary Figure 14. Number of supporting alignments for known and novel junctions          | 15     |
| Supplementary Figure 15. Splice signals at known and novel junctions                            | 16     |
| Supplementary Figure 16. Accuracy for anchored splices in primary alignments of simulated reads | 17     |
| Supplementary Figure 17. Splice recall as a function of true read coverage                      | 18     |
| Supplementary Figure 18. Examples of alignments with multiple splice junctions                  | 19     |
| Supplementary Figure 19. Effect of secondary alignments on transcript assembly by Cufflinks     | 20     |
| Supplementary Table 1. RNA-seq data sets used in this study                                     | 21     |
| Supplementary Table 2. Results on key metrics                                                   | 22     |
| Supplementary Table 3. Alignment yield                                                          | 23     |
| Supplementary Table 4. Accuracy among unique and ambiguous mappings of simulated reads          | 26     |
| Supplementary Table 5. Mapping accuracy for simulated data (all reads)                          | 27     |
| Supplementary Table 6. Mapping accuracy for simulated data (spliced reads)                      | 28     |
| Supplementary Table 7. Mapping accuracy for simulated data (unspliced reads)                    | 29     |
| Supplementary Table 8. Consistency of novel junction calls among protocols                      | 30     |
| Supplementary Table 9. Accuracy of junction discovery on simulated data                         | 31     |
| Supplementary Table 10. Number of introns reported per alignment                                | 32     |
| Supplementary Table 11. Accuracy of multi-intron alignments                                     | 35     |
| Supplementary Table 12. Transcript reconstruction accuracy                                      | 36     |
| Supplementary Table 13. Cufflinks incorporation rates for exon junctions                        | 37     |
| Supplementary Note. Alignment protocols, evaluation metrics and coverage of annotated genes     | 39     |

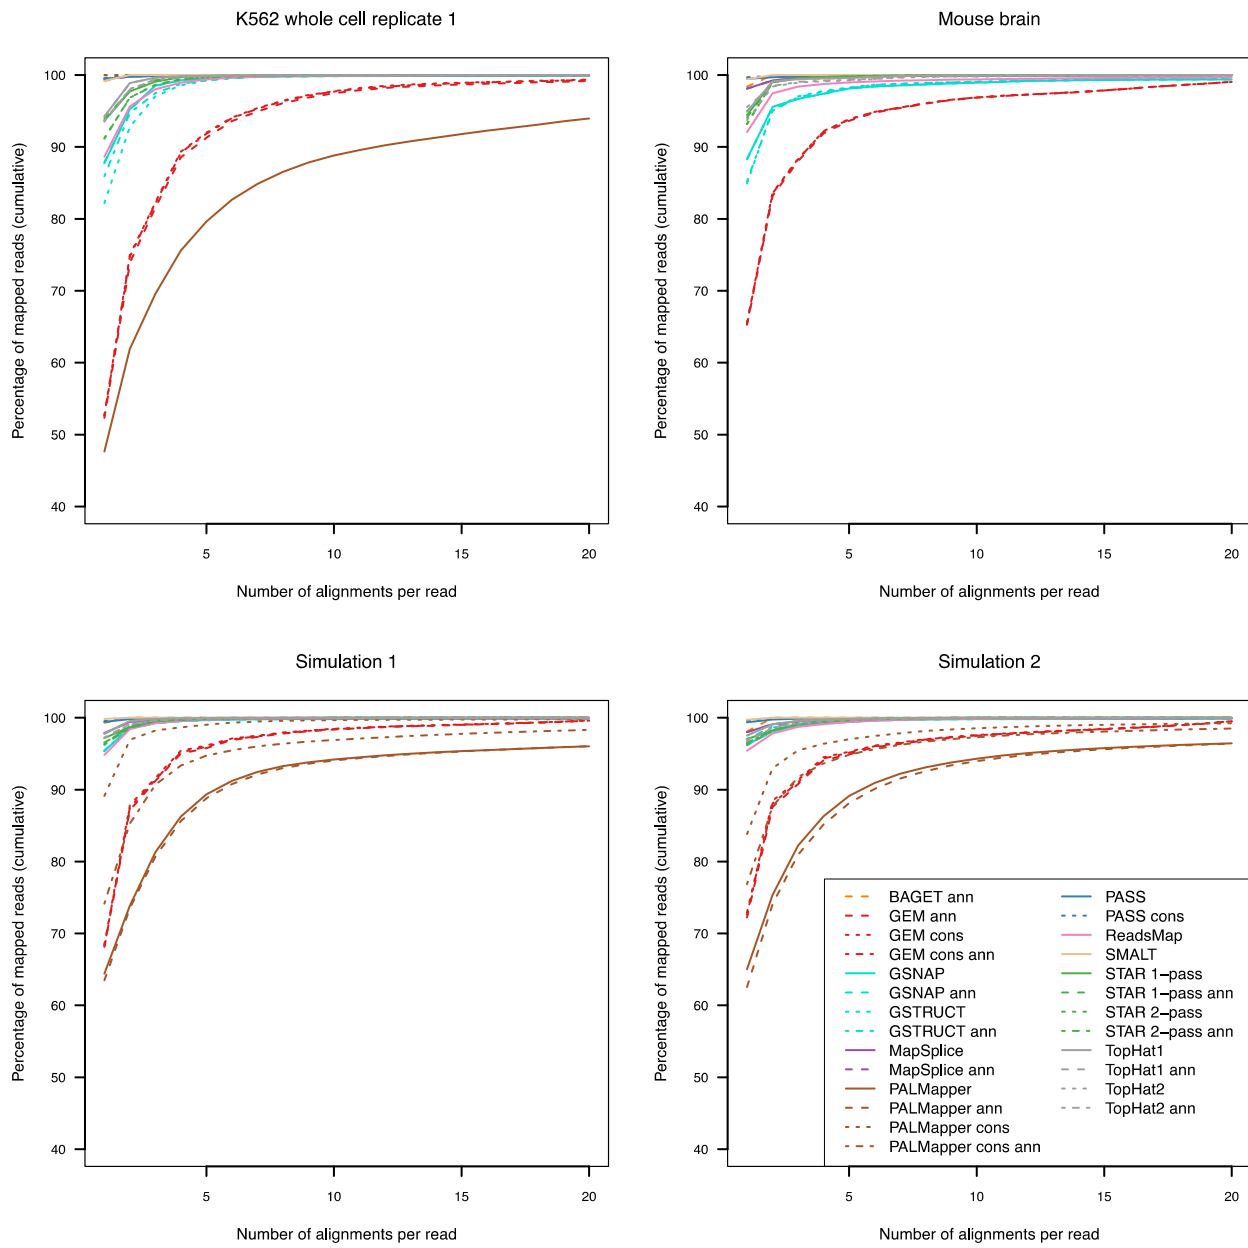

**Supplementary Figure 1.** Cumulative distribution of number of alignments per read. Distributions are shown for each protocol on four data sets. Note that PALMapper was not run on the mouse data, and only two of the four PALMapper protocols were applied to the K562 data (PALMapper and PALMapper cons).

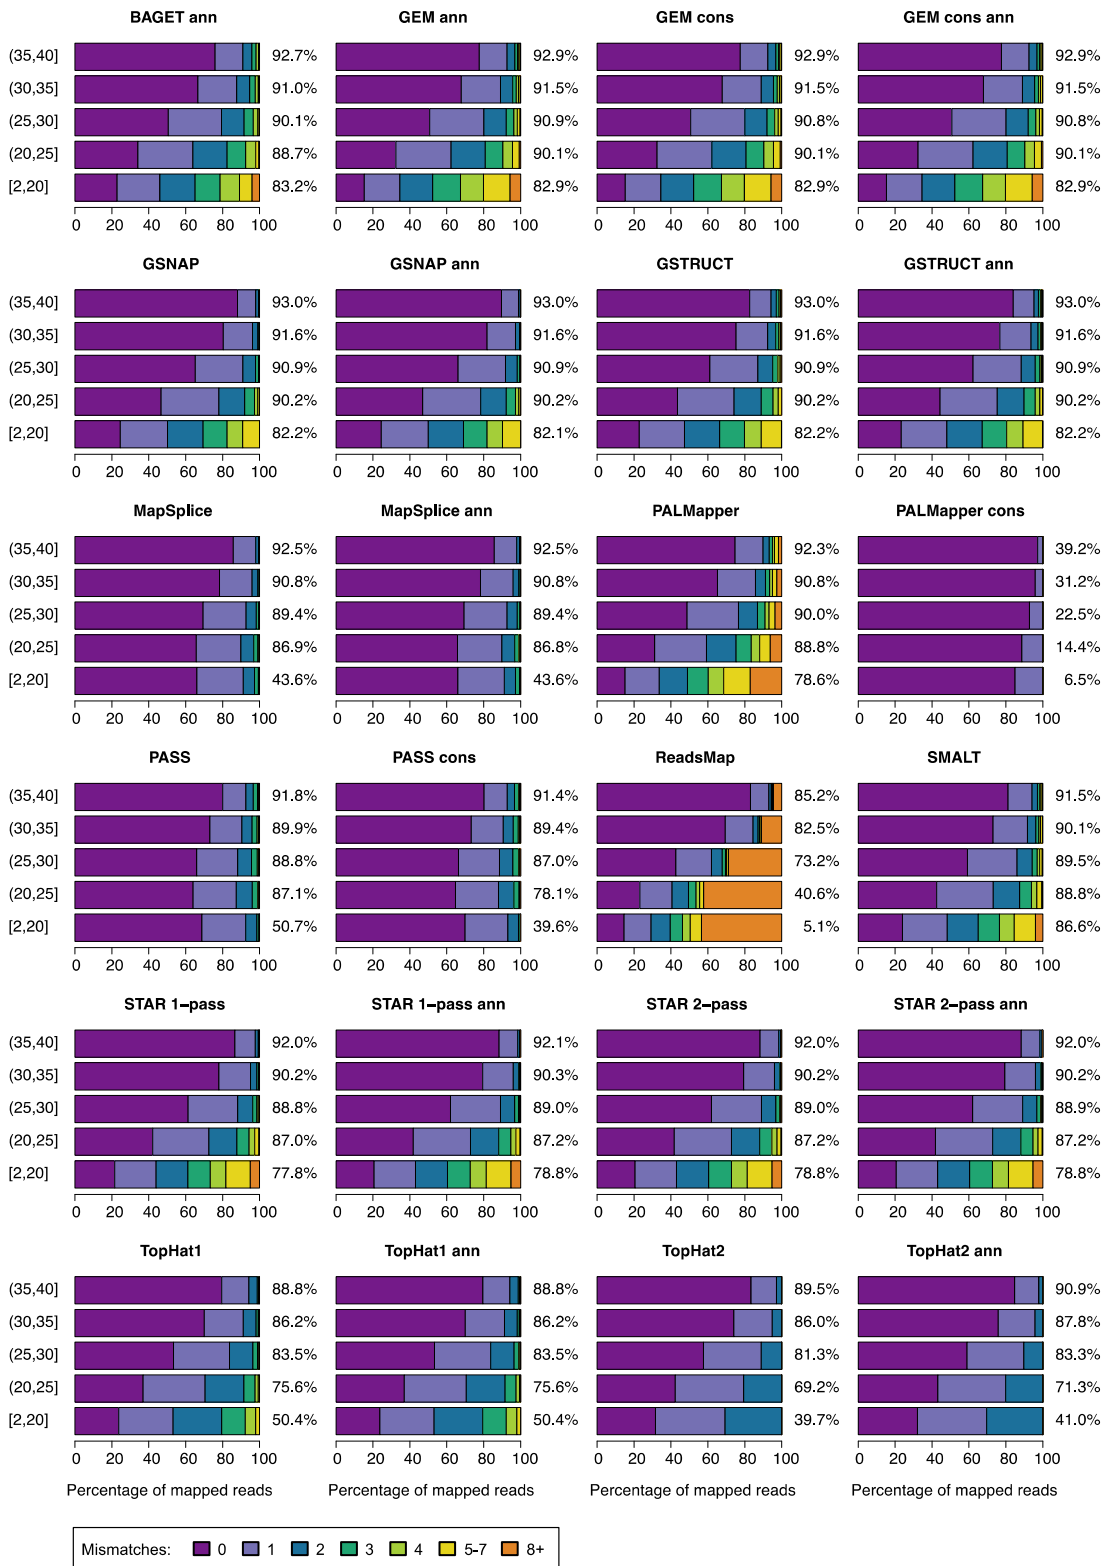

**Supplementary Figure 2.** Mismatch frequencies stratified by base caller quality scores. Results for K562 whole cell replicate 1 are shown. Reads were divided into five categories by mean quality score. Quality scores range from 2 to 40, with lower scores corresponding to less confident base calls. Bars show distribution of mismatches per alignment, demonstrating that most methods tend to align low-quality reads with more mismatches. Percentages of aligned reads are tabulated for each protocol and quality score category, showing that protocols differ in the extent to which mappability depends on quality score.

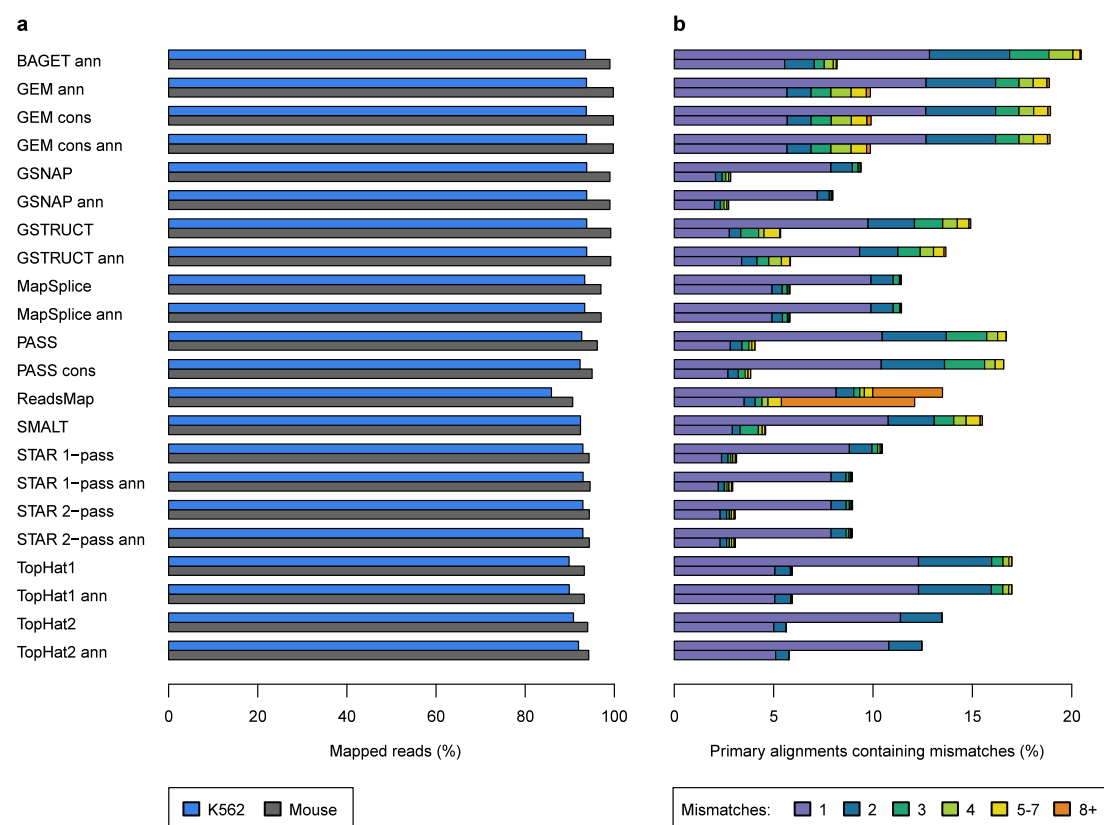

**Supplementary Figure 3.** Mapping statistics for high-quality reads from K562 and mouse. Mapping yield (a) and mismatch frequencies (b) are shown for reads with a mean base call quality score of at least 38. Results for K562 whole cell RNA replicate 1 (upper bar for each protocol) are compared to those for the mouse data set (lower bar). Mismatch frequencies represent the proportion of mapped reads for which the primary alignment contains the indicated number of mismatches.

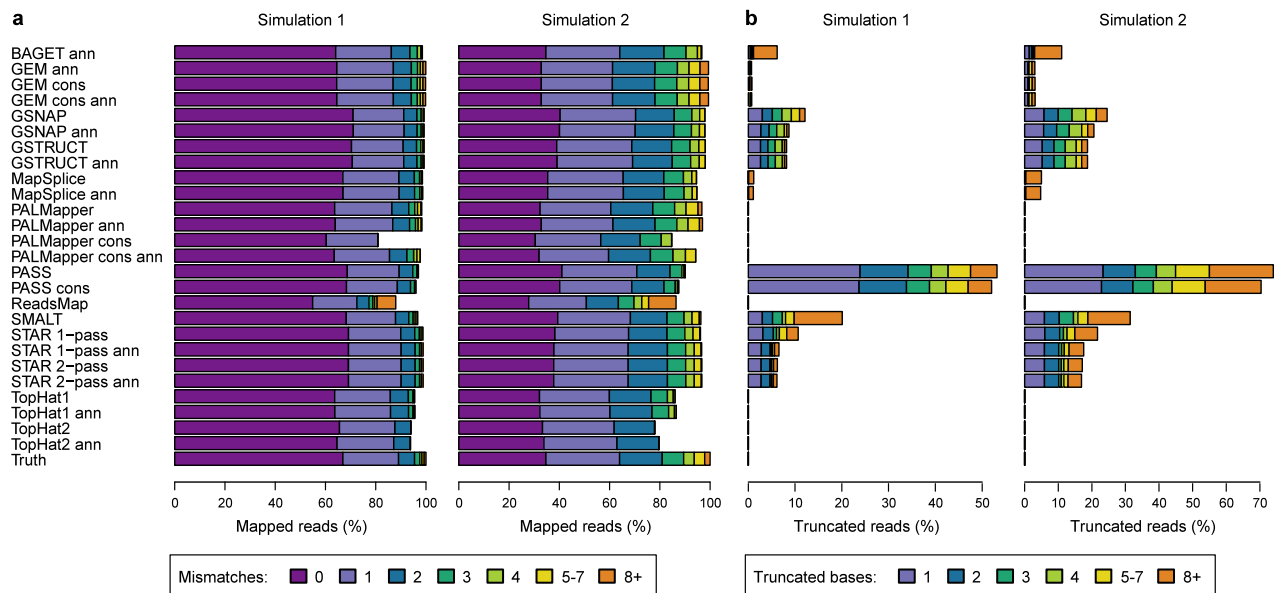

**Supplementary Figure 4.** Mismatch and truncation frequencies for alignments of simulated data. (a) Percentage of reads aligned with the indicated number of mismatches. (b) Percentage of reads that were truncated at either or both ends (colors indicate the number of bases removed per read). The bars labeled “Truth” show frequencies for the alignments produced by the simulator, corresponding to the results expected from a perfect aligner.

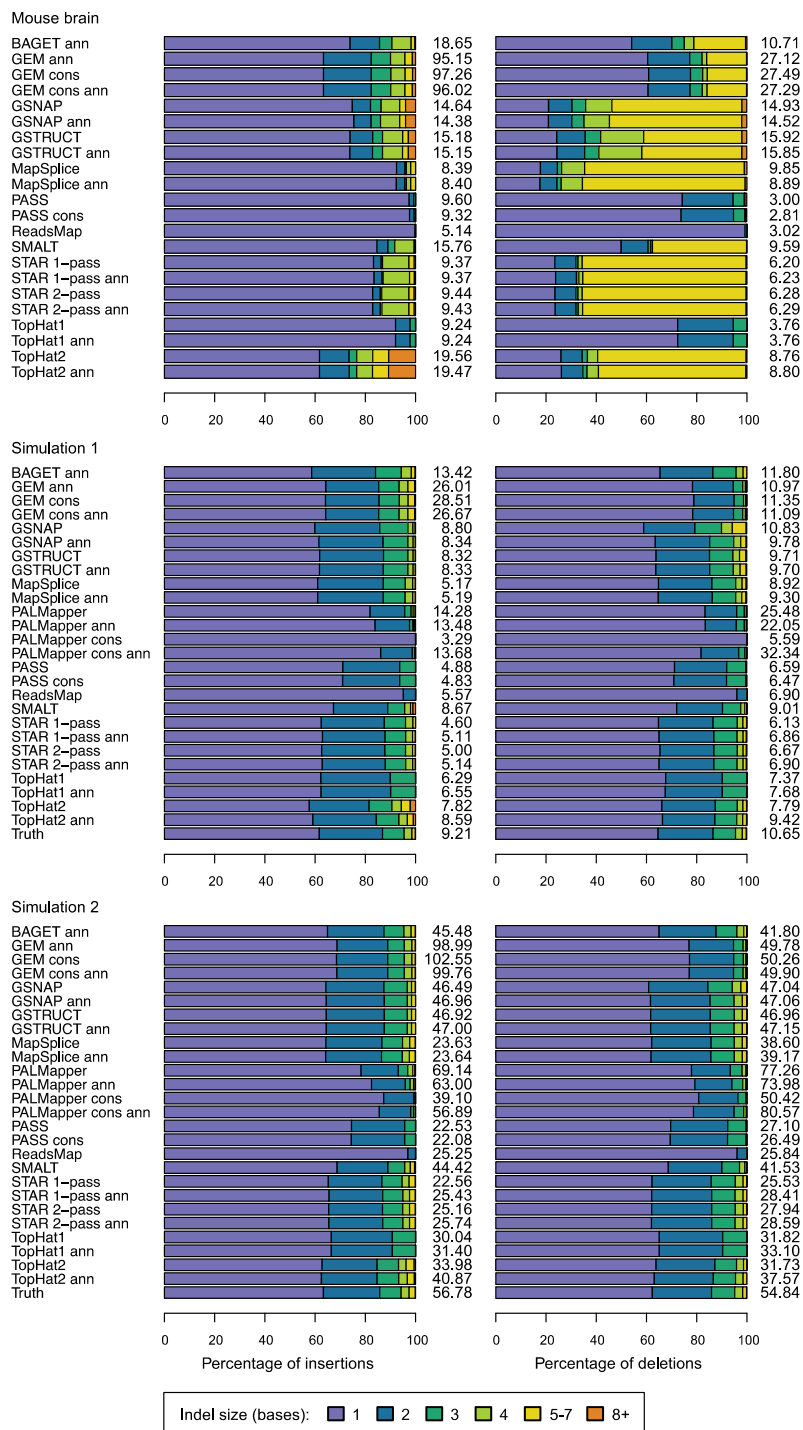

**Supplementary Figure 5.** Indel frequencies for mouse and simulated data. Bars show size distribution of indels. Indel frequencies are tabulated (number of indels per thousand sequenced reads). The mouse data set contains a significant number of 45S ribosomal RNA reads that align best with a six bp deletion to a locus on chromosome 17. For the two simulated data sets, the last bars show the results expected for a perfect aligner (Truth).

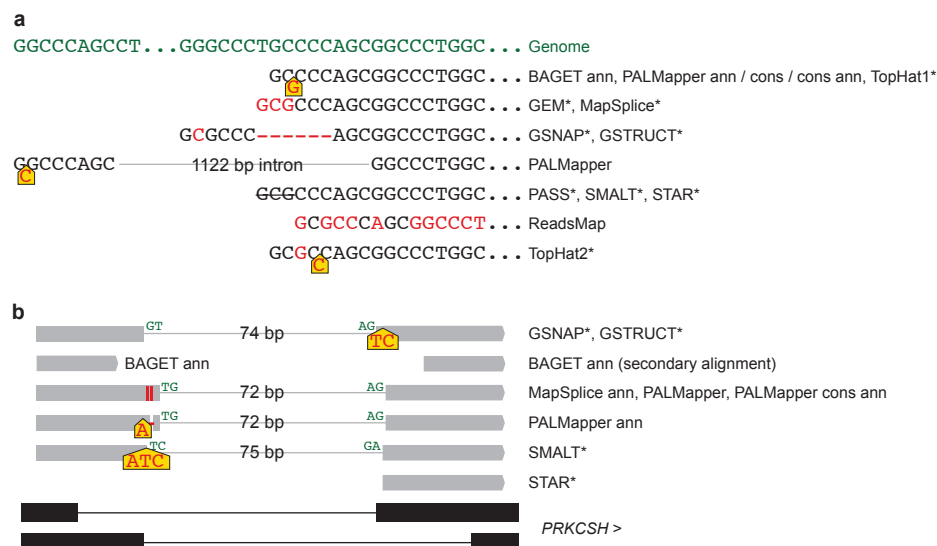

**Supplementary Figure 6.** Examples of mapping results for reads with small insertions. (a) Alignments of simulated read containing an insertion at the third position. All protocols mapped the read to the correct locus, but the exact simulated alignment was only recovered by BAGET, three PALMapper protocols and TopHat1. The first 18 bases of the read are shown. Mismatches (red), deletions (red dash) and insertions (red on yellow) are indicated. Asterisks indicate aligners for which all protocols produced the same alignment. The PALMapper base protocol erroneously predicted a 1122 bp intron with noncanonical acceptor and donor dinucleotides (CT, GC). PASS, SMALT and STAR truncated the first three positions of the read. ReadsMap placed the read three bases away from its correct location, resulting in 59 mismatches. (b) Alignments of a simulated read containing an insertion near a junction joining two exons of the gene *PRKCSH*. Only GSNAP and GSTRUCT recovered the simulated alignment. Grey bars represent aligned segments in genomic coordinates. Mismatches and gaps are colored as in panel c. Grey lines represent predicted introns. Only the correct alignment has canonical acceptor and donor dinucleotides (GT..AG, green). Annotated *PRKCSH* junctions are shown in black. All reported primary alignments are shown. GEM, PASS, ReadsMap and TopHat did not map the read.

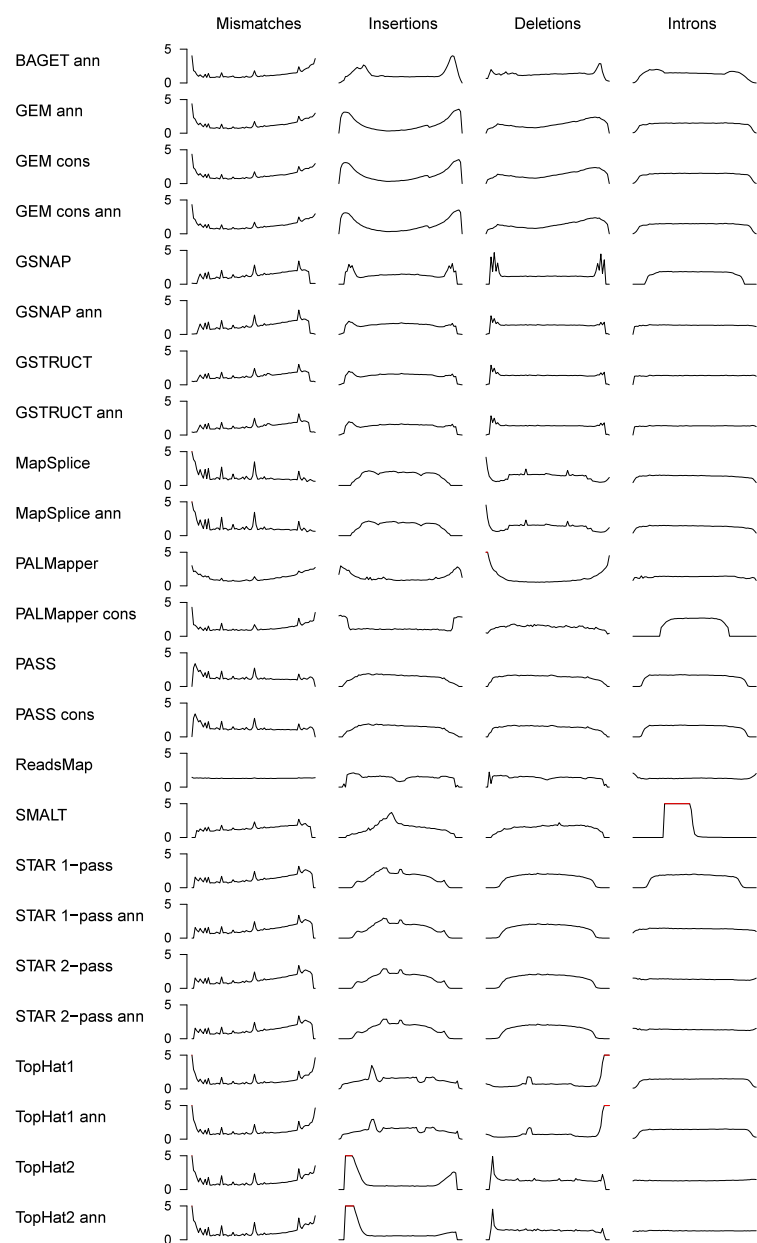

**Supplementary Figure 7.** Positional distribution of mismatches and gaps over read sequences. Curves show the distribution (percentage) of the indicated operations along the 76 nt read sequences, computed over the primary alignments for K562 whole cell replicate 1. Red lines indicate positions where the frequency exceeds 5%.



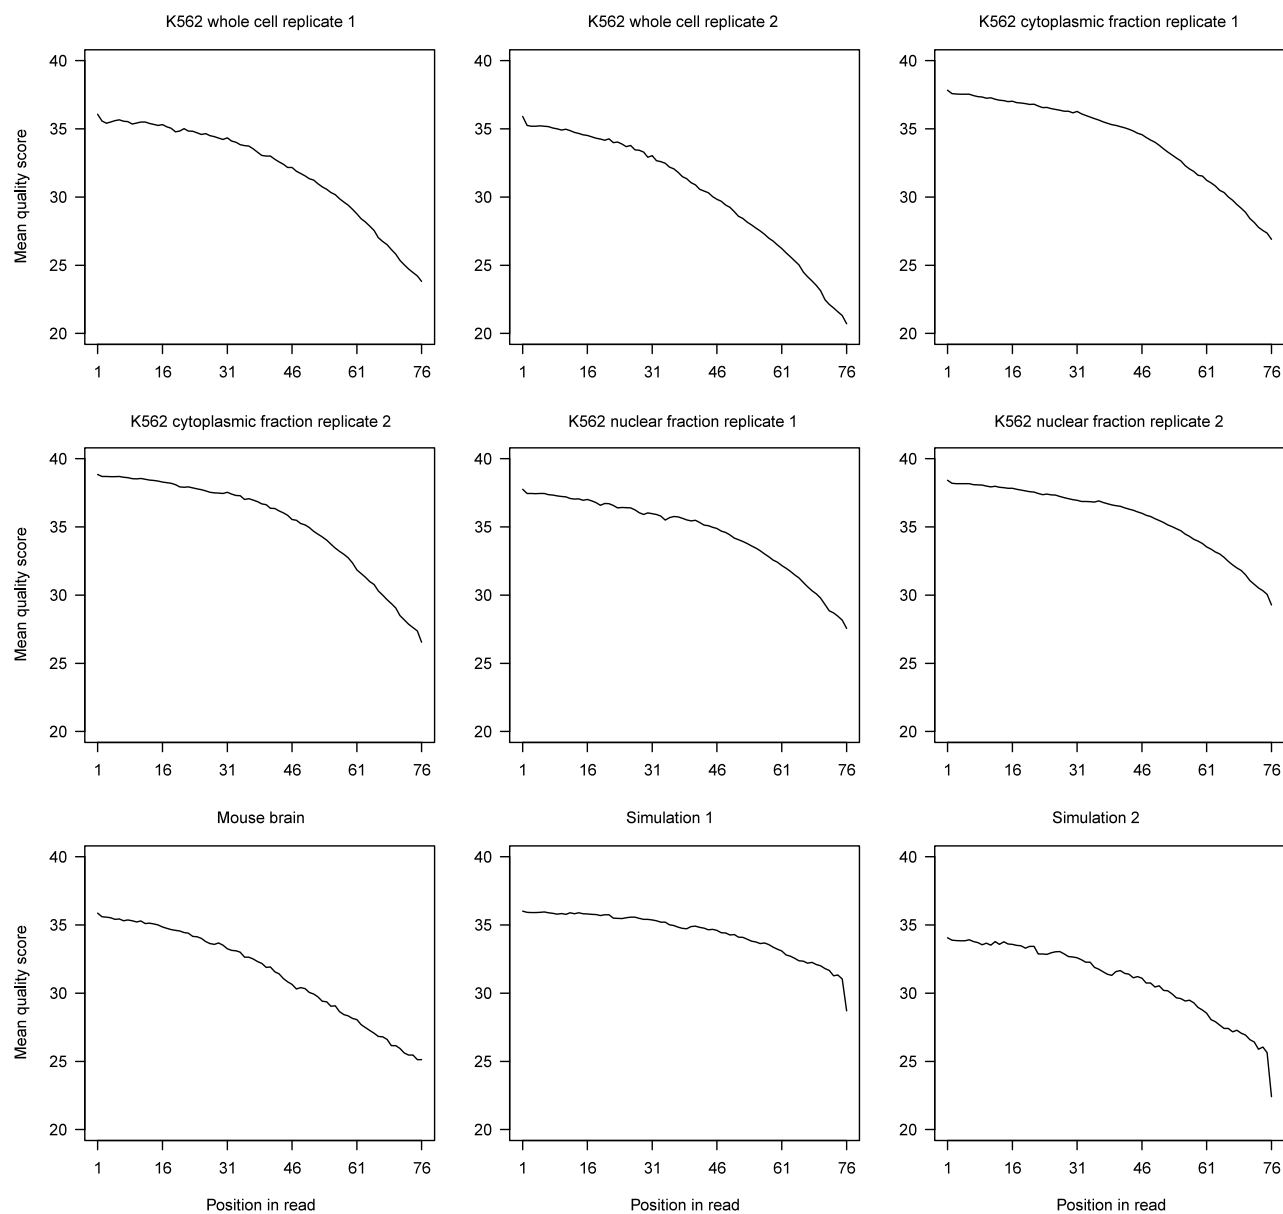

**Supplementary Figure 8.** Base call quality score distributions for the RNA-seq data sets used in this study.

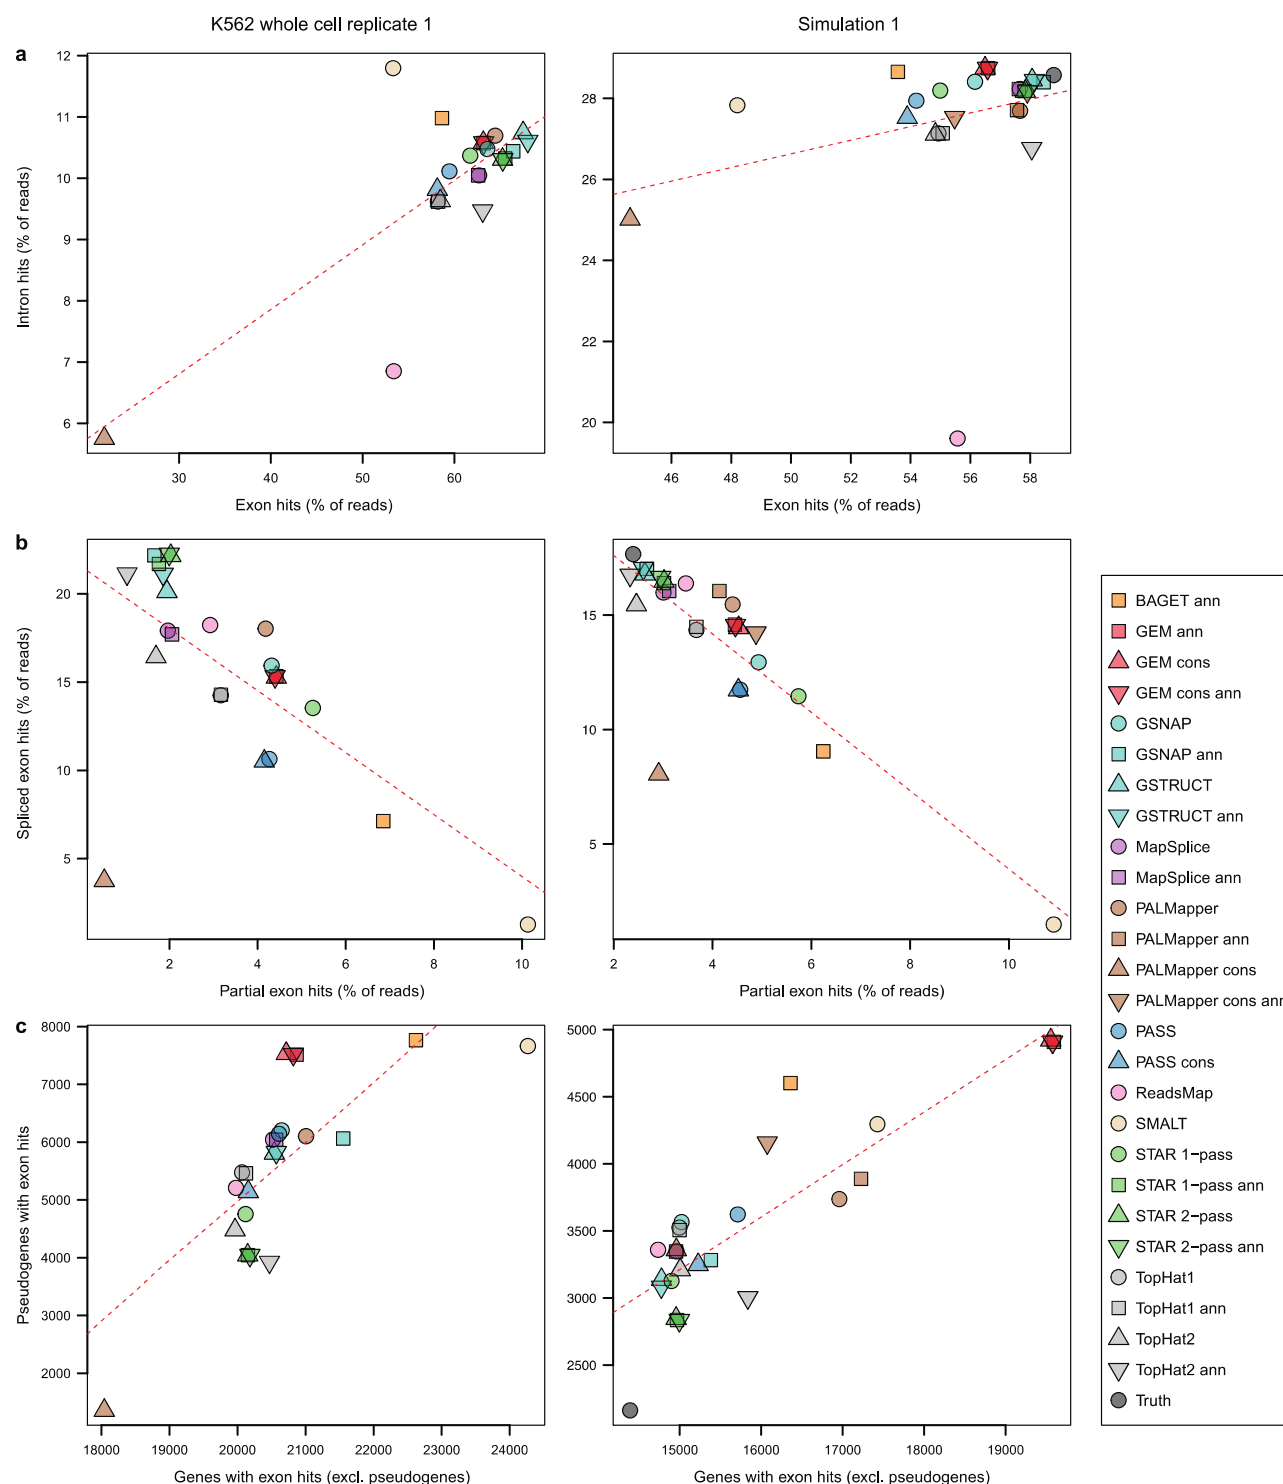

**Supplementary Figure 9.** Coverage of annotated genes for K562 whole cell and simulation 1. Scatter plots show a range of metrics reflecting coverage of Ensembl genes by RNA-seq read alignments, for K562 whole cell replicate 1 (left) and simulated data set 1 (right). (a) Percentage of sequenced or simulated reads for which all mapped bases fall within exon sequence versus those with all mapped bases confined to introns. (b) Percentage of reads for which mappings partially overlap exons (i.e. alignments where a subset of the genomic positions are annotated as exonic) versus those aligned in a spliced manner with all mapped bases in exon sequence. Note the negative correlation, suggesting that partial exon hits often result from failure to identify splice junctions. (c) Number of genes (including non-coding genes) with fully exonic mappings versus number of pseudogenes with such mappings. For simulated data, “Truth” corresponds to the results expected for a perfect aligner. See also Supplementary Figures 10–12.

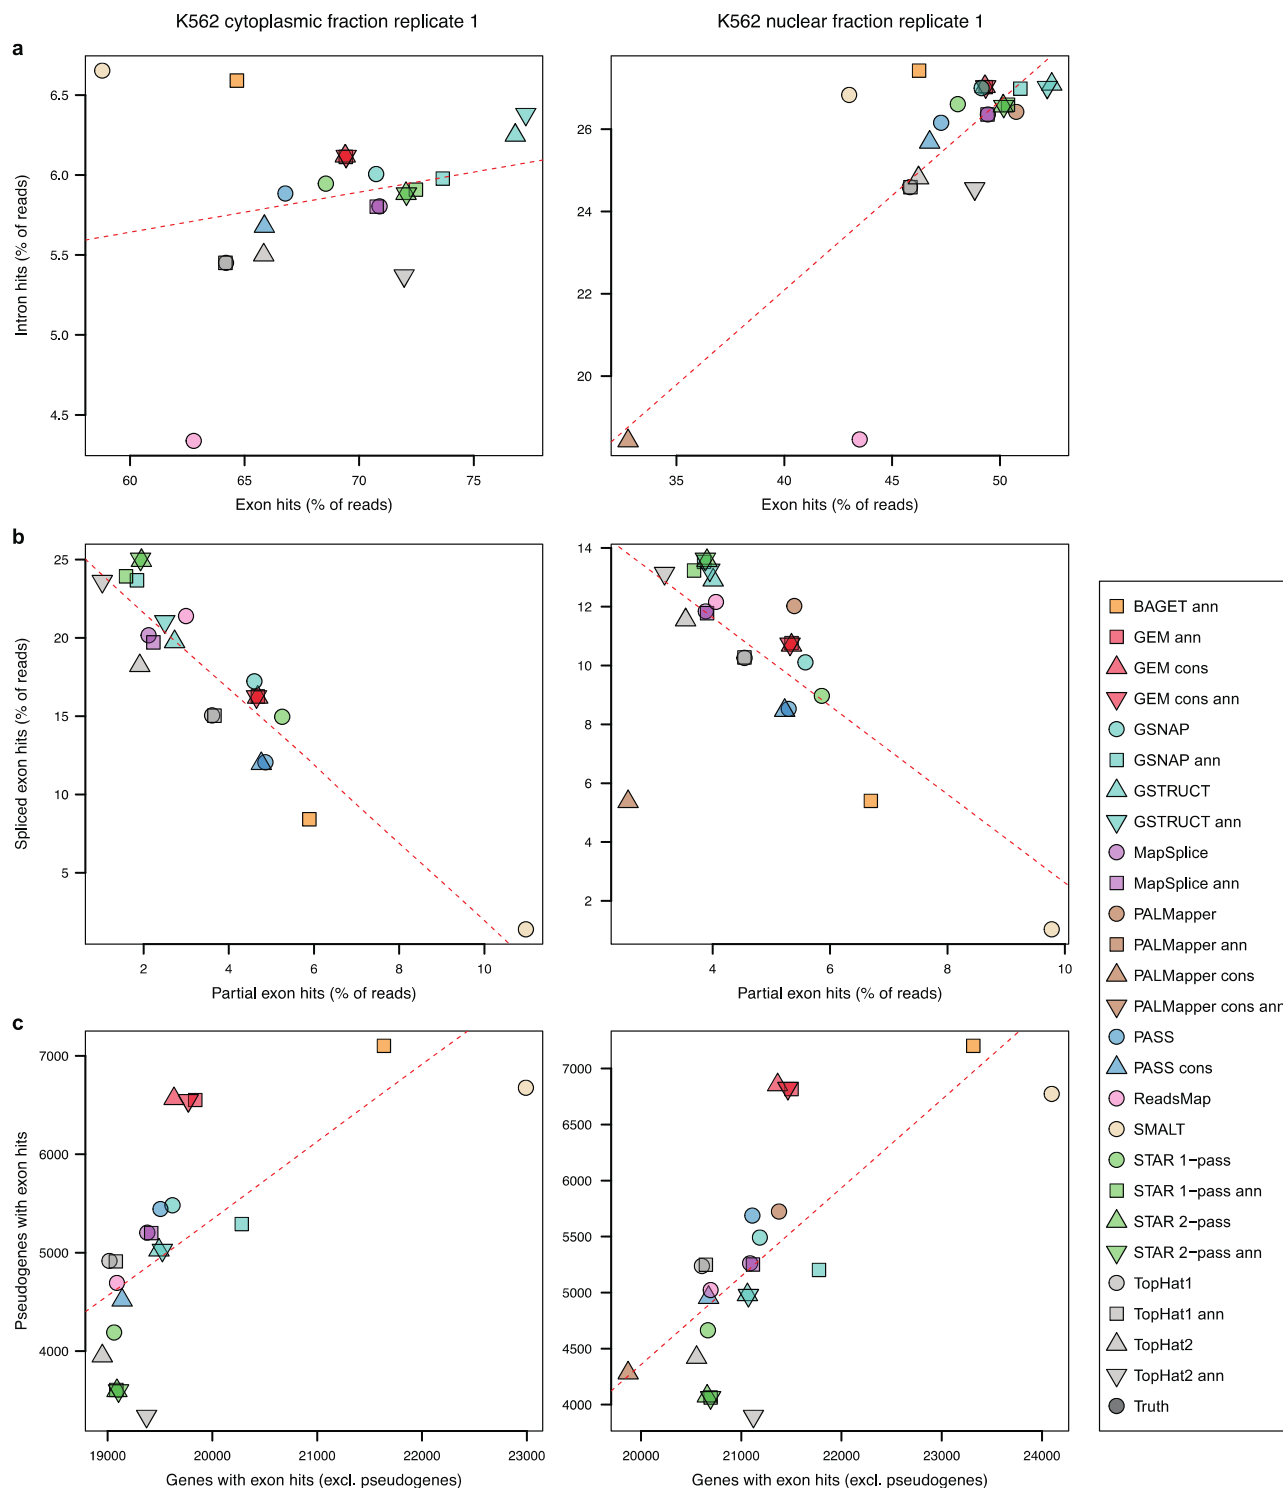

**Supplementary Figure 10.** Coverage of annotated genes for K562 cytoplasmic and nuclear RNA. Scatter plots show a range of gene coverage metrics as in Supplementary Figure 9.

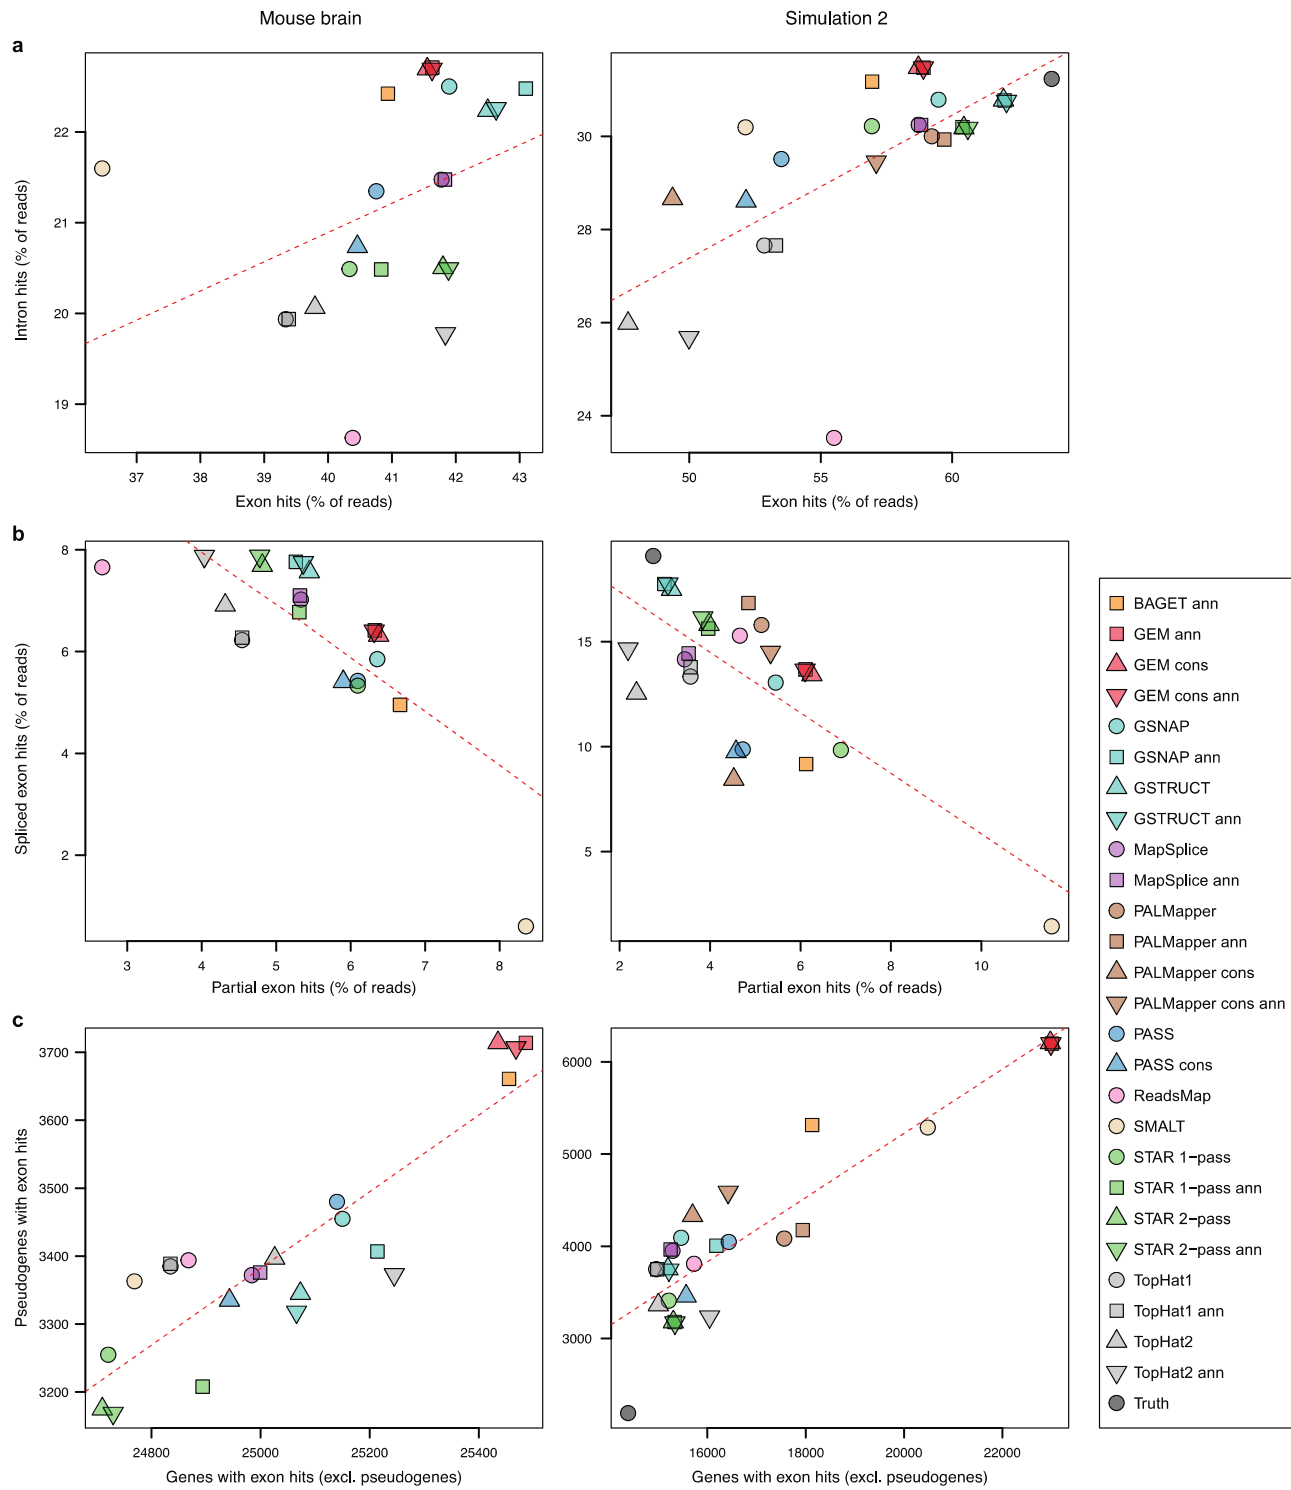

**Supplementary Figure 11.** Coverage of annotated genes for mouse and simulation 2. Scatter plots show a range of gene coverage metrics as in Supplementary Figure 9.

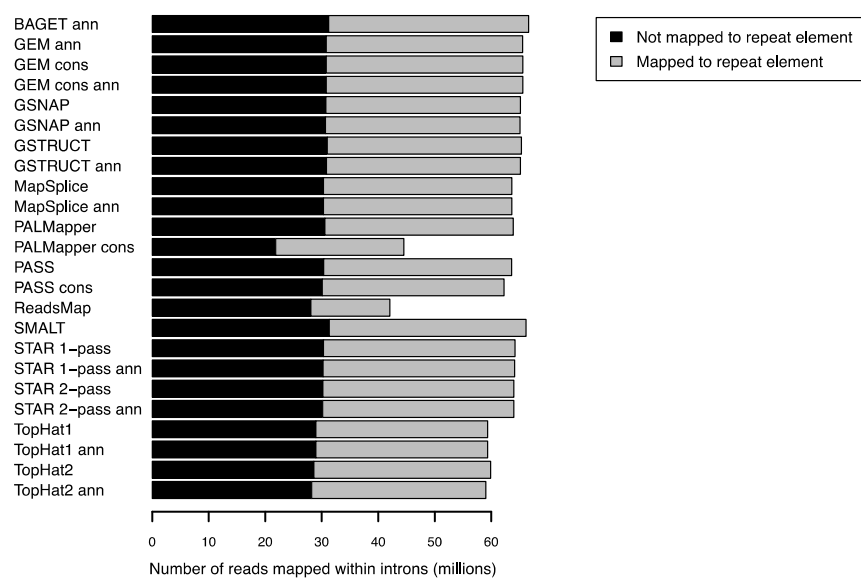

**Supplementary Figure 12.** Mapping frequency at intronic repeats. Results for K562 nuclear fraction replicate 1 are shown. Grey bar segments indicate the proportion of intronic mappings that overlap with repeat elements. Note the lower proportion of such mappings for ReadsMap.

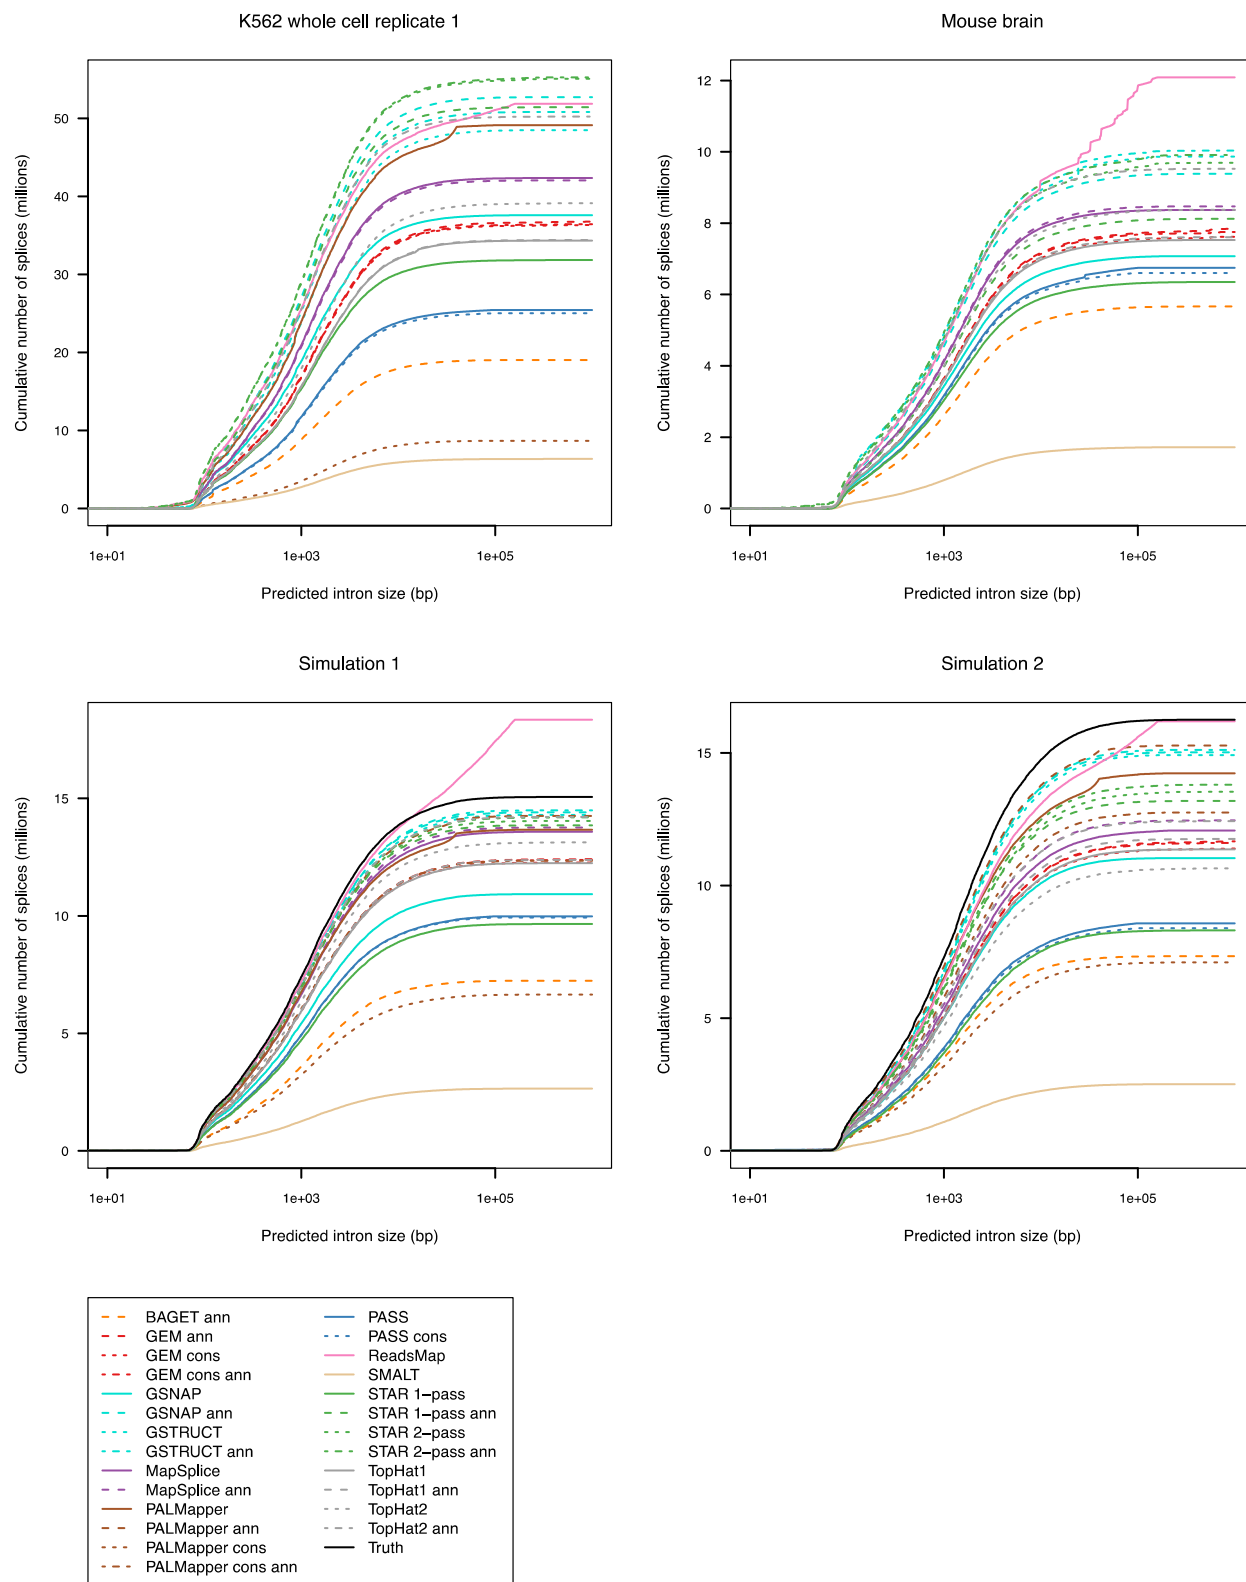

**Supplementary Figure 13.** Size distribution for splices in primary alignments. Cumulative distributions are shown for each protocol on four data sets. For the two simulated data sets, the true size distribution is also shown (black curves). For PALMapper and ReadsMap, the distributions show an unexpected pattern near the saturation point, suggesting a problem with the scoring of very long splices by these two aligners.

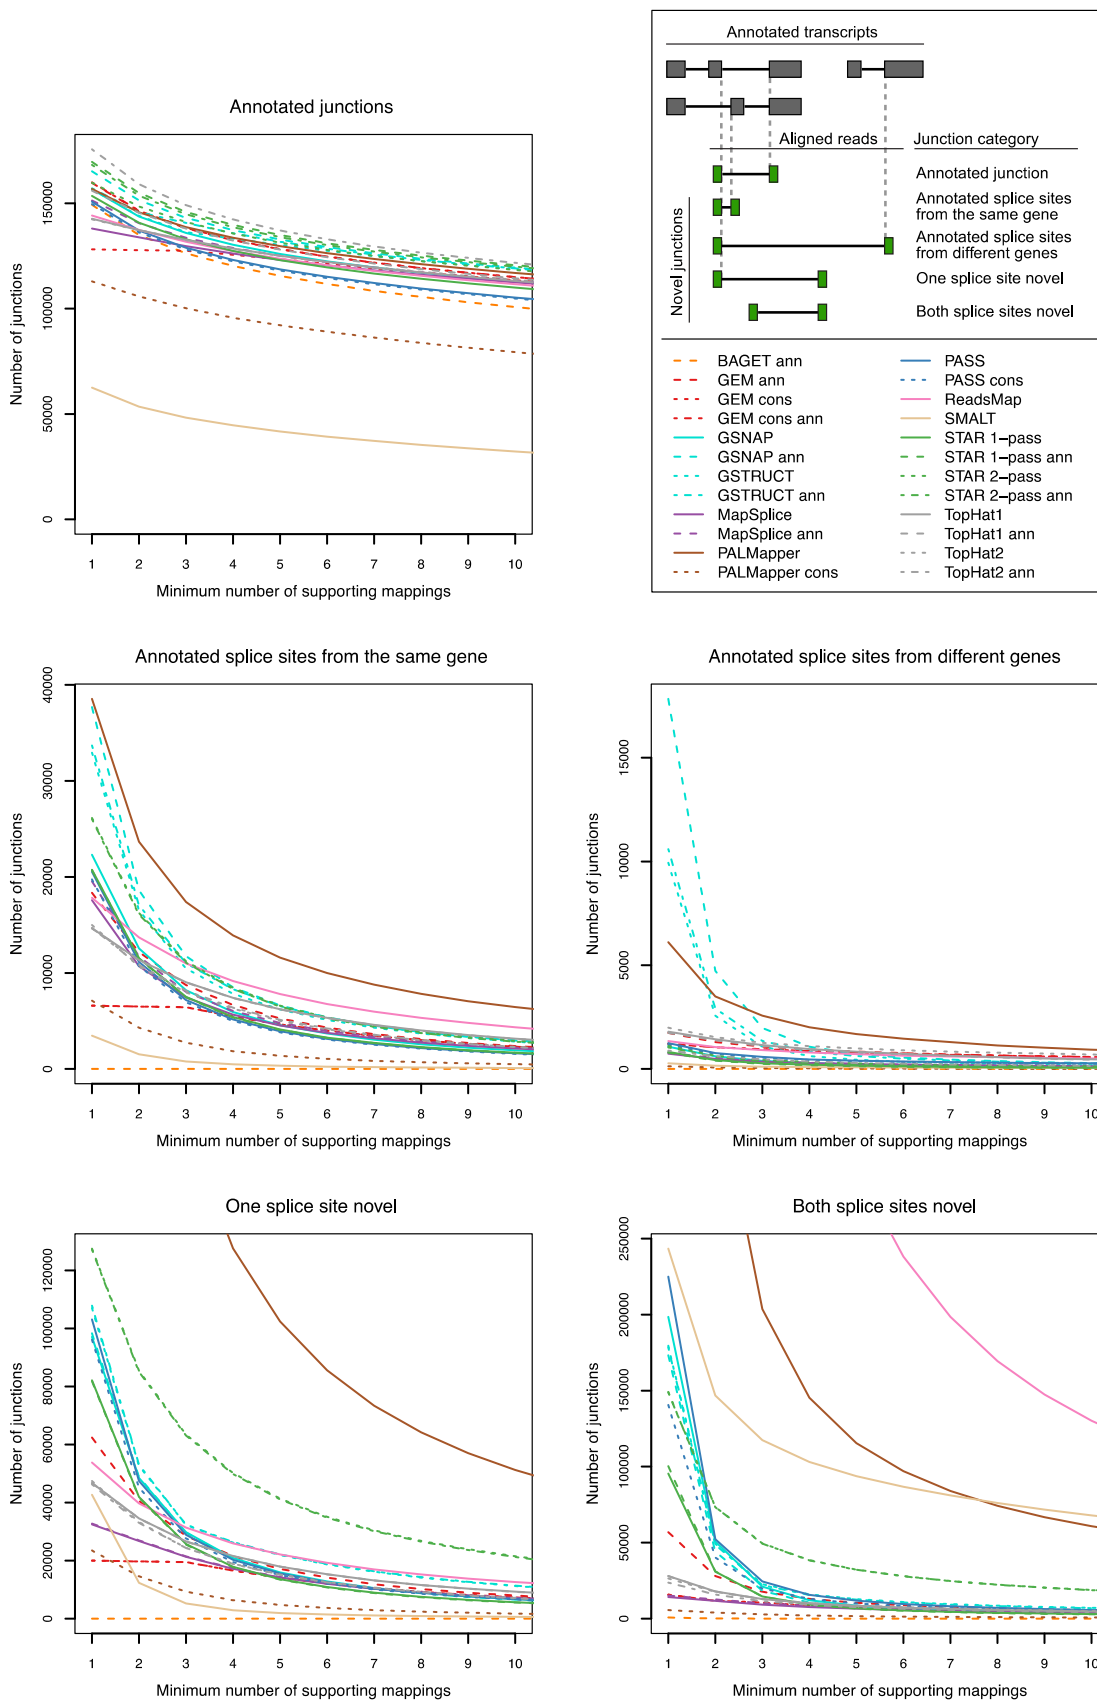

**Supplementary Figure 14.** Number of supporting alignments for known and novel junctions. Results for K562 whole cell replicate 1 are shown. Curves illustrate the frequency of junctions for different thresholds on the number of supporting primary alignments. Reported junctions were classified into five categories by comparison to junctions annotated in the Ensembl database (see pictogram). Note that known junctions tend to have many supporting alignments (top left plot), while unannotated junctions typically have few (other plots).

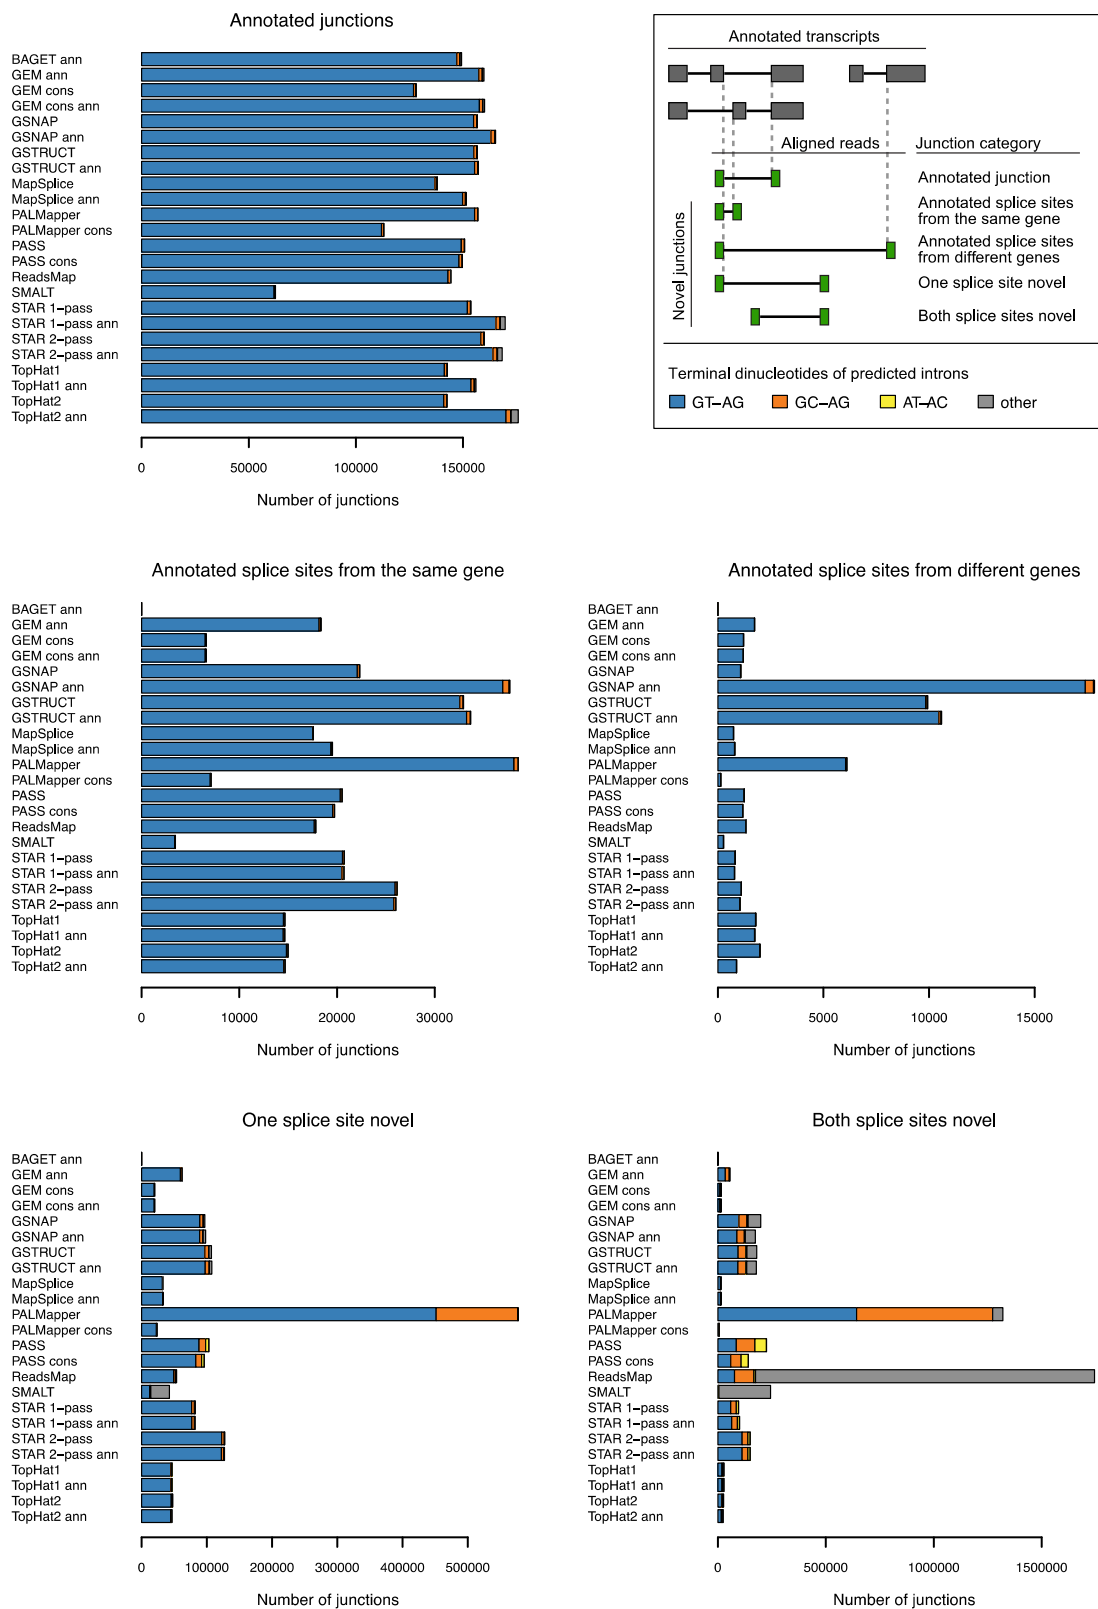

**Supplementary Figure 15.** Splice signals at known and novel junctions. Results for K562 whole cell replicate 1 are shown. Reported junctions were classified into five categories by comparison to those annotated in the Ensembl database and further stratified according to the first and last dinucleotides of inferred introns (see inset legend). The great majority of known introns begin with GT and end with AG, whereas a small proportion have the sequences GC-AG and AT-AC (see Methods). Directionality was not considered in this analysis (i.e. CT-AC was counted as GT-AG), since RNA-seq data cannot be assumed to be perfectly strand-specific.



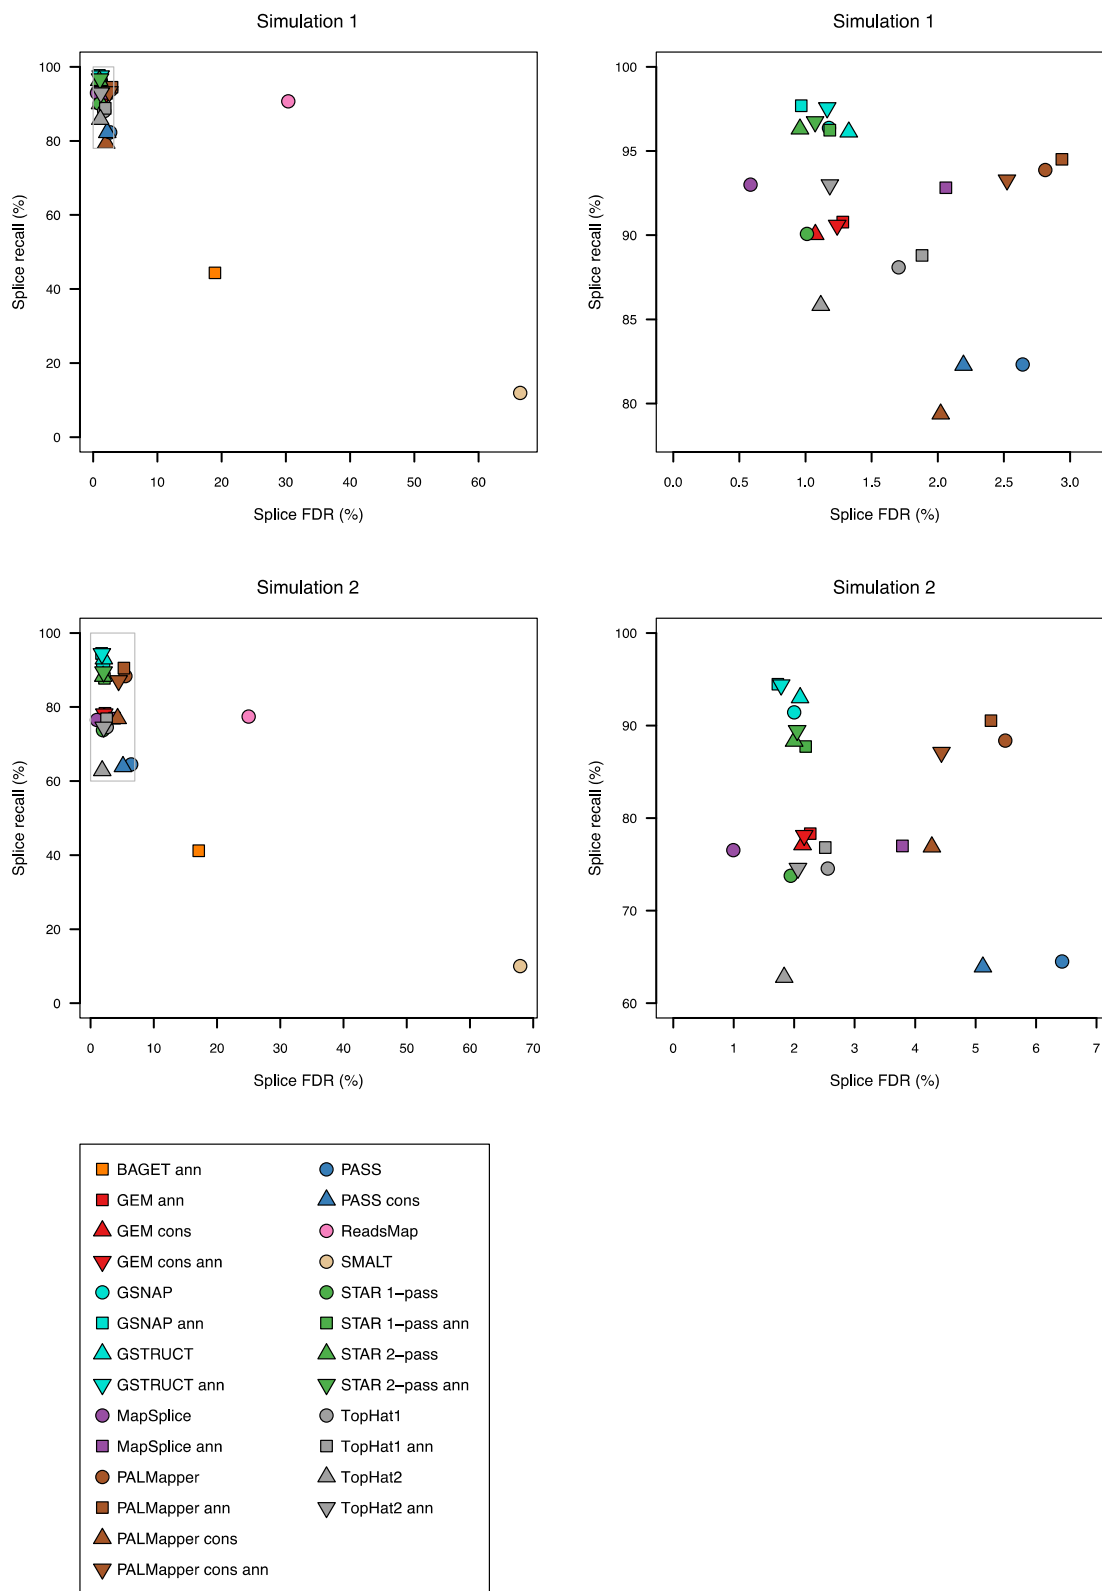

**Supplementary Figure 16.** Accuracy for anchored splices in primary alignments of simulated reads. Recall and false discovery rate (FDR) is presented for splices located between positions 20 and 57 in the 76 nt reads. Accuracy tends to be higher for this subset of splices compared to those with less flanking sequence (cf. Fig. 5a, where results for all splices are shown). The left plots depict results for all protocols, whereas the right plots show details of the most dense areas (indicated by grey rectangles in the left plots).

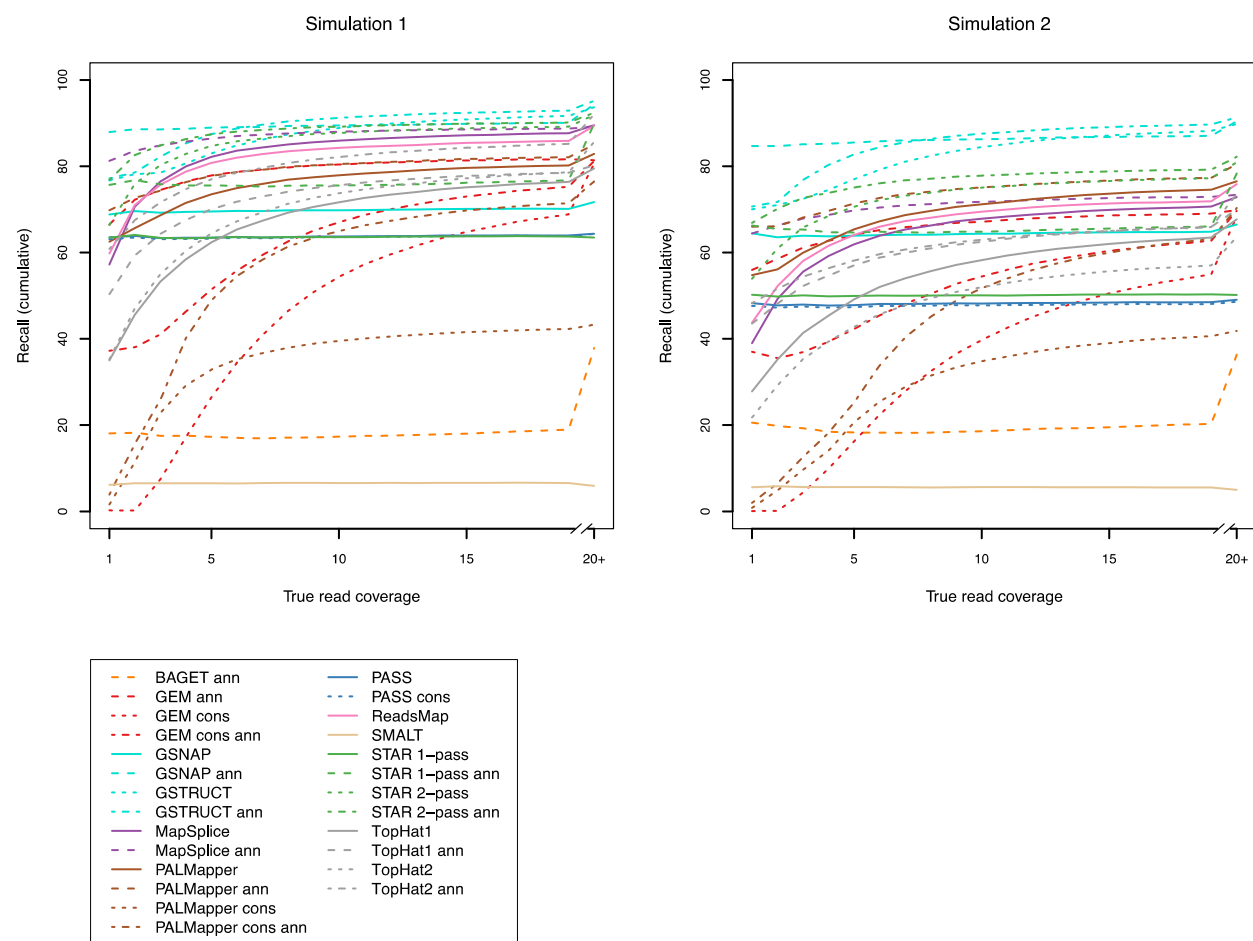

**Supplementary Figure 17.** Splice recall as a function of true read coverage. Curves depict the cumulative percentage of correctly identified splices as a function of the true number of simulated reads spanning the corresponding exon junctions.

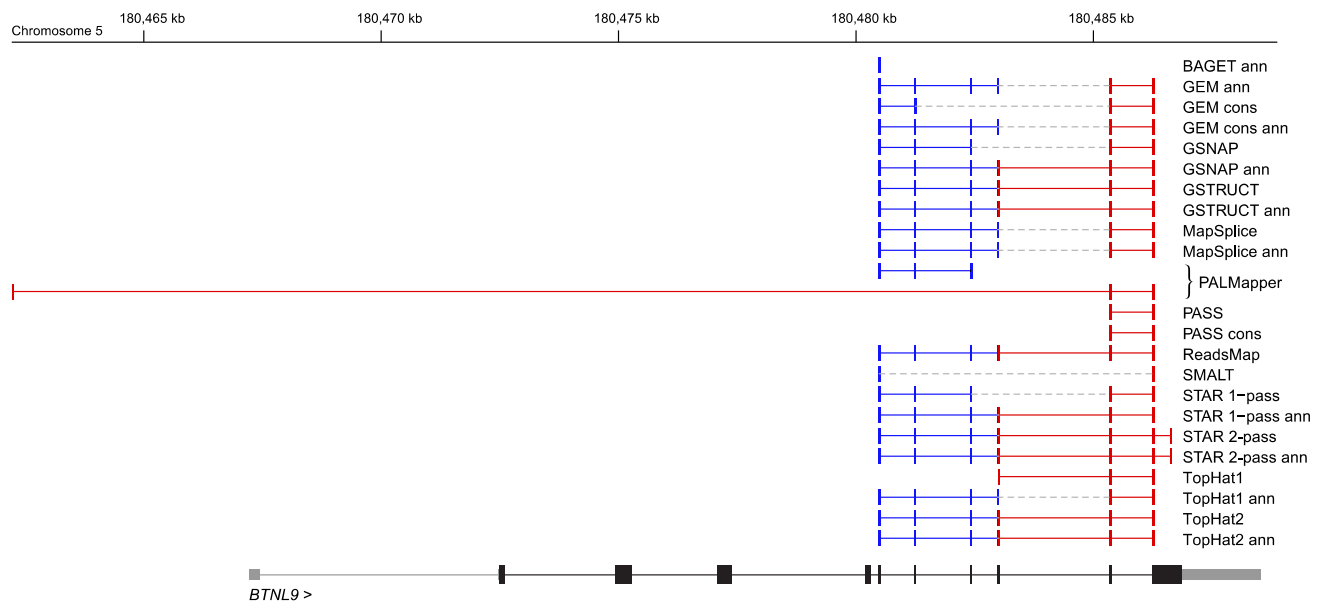

**Supplementary Figure 18.** Examples of alignments with multiple splice junctions. Alignments of a read pair from the K562 data set mapping across six exons of the gene *BTNL9*. The first mate (red) contains two exon junctions, and the second mate (blue) contains three. Paired alignments are connected by dashed lines. All reported primary alignments are shown. *BTNL9* coding sequence is indicated in black and untranslated regions in gray. Nine protocols (GSNAP ann, GSTRUCT, GSTRUCT ann, ReadsMap, STAR 1-pass ann, STAR 2-pass, STAR 2-pass ann, TopHat2 and TopHat2 ann) successfully identified all junctions. However, the STAR 2-pass protocols predicted an additional, most likely erroneous junction separating the first base of mate 1 from the remainder of the read. PASS, PASS cons and TopHat1 only mapped the first mate, whereas BAGET only mapped the second. The PALMapper base protocol produced incompatible alignments of the two mates and the conservative PALMapper protocol did not report alignments for either mate.

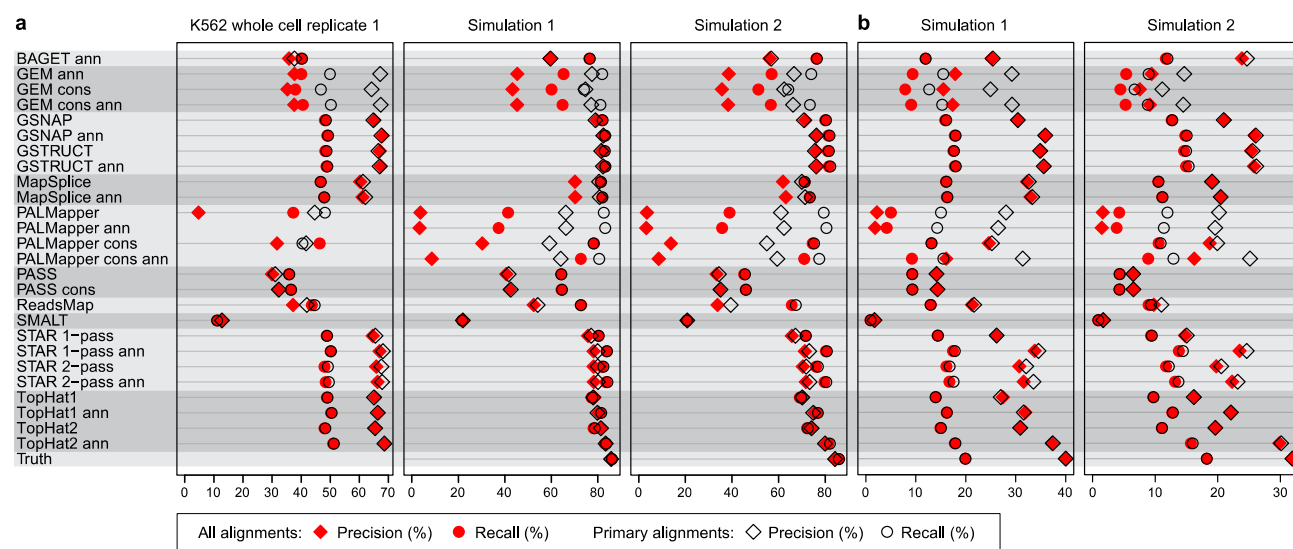

**Supplementary Figure 19.** Effect of secondary alignments on transcript assembly by Cufflinks. Performance was assessed by measuring precision and recall for individual exons (a) and spliced transcripts (b), using all alignments from each protocol (red symbols) or the subset of primary alignments (open symbols). For K562 data, precision was defined as the fraction of predicted exons matching Ensembl annotation, and recall as the fraction of annotated exons that were predicted. Only exons from protein-coding genes were considered. Results on simulated data were benchmarked against simulated gene models, using analogous definitions of precision and recall. The last row shows the results obtained when using perfect alignments produced by the simulator (Truth).

**Supplementary Table 1.** RNA-seq data sets used in this study.

| Name                                  | ID        | Species                | Read pairs | Sequencing lanes |
|---------------------------------------|-----------|------------------------|------------|------------------|
| K562 whole cell replicate 1           | LID16627  | Human (cell line)      | 113588758  | 3                |
| K562 whole cell replicate 2           | LID16628  | Human (cell line)      | 119053315  | 3                |
| K562 cytoplasmic fraction replicate 1 | LID8465   | Human (cell line)      | 124826068  | 3                |
| K562 cytoplasmic fraction replicate 2 | LID8466   | Human (cell line)      | 88445339   | 3                |
| K562 nuclear fraction replicate 1     | LID8556   | Human (cell line)      | 117113622  | 3                |
| K562 nuclear fraction replicate 2     | LID8557   | Human (cell line)      | 105769104  | 3                |
| Mouse brain                           | ERS028664 | Mouse strain C57BL/6NJ | 57187342   | 2                |
| Simulation 1                          | n.a.      | Human                  | 40000000   | n.a.             |
| Simulation 2                          | n.a.      | Human                  | 40000000   | n.a.             |

n.a., not applicable.

**Supplementary Table 2.** Results on key metrics.

|                    | Mapped reads <sup>a</sup> |              |              |              | Correctly mapped bases <sup>b</sup> |              | Incorrectly mapped bases <sup>b</sup> |             | Splice frequency <sup>c</sup> |              |              |              | Junction recall (≥2 mappings) <sup>d</sup> |              | Junction precision (≥2 mappings) <sup>d</sup> |              |
|--------------------|---------------------------|--------------|--------------|--------------|-------------------------------------|--------------|---------------------------------------|-------------|-------------------------------|--------------|--------------|--------------|--------------------------------------------|--------------|-----------------------------------------------|--------------|
|                    | K562                      | M            | S1           | S2           | S1                                  | S2           | S1                                    | S2          | K562/1                        | M            | S1           | S2           | S1                                         | S2           | S1                                            | S2           |
| BAGET ann          | 92.94                     | 95.71        | 98.58        | 96.77        | 90.61                               | 87.49        | 5.23                                  | 4.83        | 8.38                          | 4.95         | 9.05         | 9.17         | 63.03                                      | 61.89        | 95.56                                         | 94.91        |
| GEM ann            | <b>93.87</b>              | <b>98.33</b> | <b>99.90</b> | <b>99.40</b> | 96.54                               | 94.33        | 3.29                                  | 4.76        | 16.23                         | 6.91         | 15.55        | 14.62        | 95.34                                      | 90.80        | 95.60                                         | 89.60        |
| GEM cons           | 93.85                     | 98.31        | 99.88        | 99.36        | 96.49                               | 94.25        | 3.30                                  | 4.80        | 16.01                         | 6.70         | 15.35        | 14.26        | 84.08                                      | 77.39        | 96.56                                         | 91.57        |
| GEM cons ann       | 93.86                     | <b>98.33</b> | <b>99.90</b> | 99.39        | 96.53                               | 94.32        | 3.29                                  | 4.77        | 16.07                         | 6.81         | 15.50        | 14.53        | 90.14                                      | 86.22        | 96.15                                         | 91.51        |
| GSNAP              | 93.80                     | 96.71        | 99.24        | 97.95        | 96.84                               | 94.55        | 1.75                                  | 2.01        | 16.55                         | 6.19         | 13.66        | 13.79        | 95.61                                      | 95.34        | 95.58                                         | 93.58        |
| GSNAP ann          | 93.82                     | 96.72        | 99.25        | 97.97        | 97.52                               | 95.27        | 1.35                                  | 1.70        | 23.21                         | 8.20         | 18.01        | 18.78        | <b>98.12</b>                               | <b>97.90</b> | 93.28                                         | 91.04        |
| GSTRUCT            | <b>93.87</b>              | 97.44        | 99.26        | 98.11        | 96.95                               | 94.85        | 1.95                                  | 2.34        | 21.35                         | 8.63         | 17.87        | 18.65        | 96.79                                      | 96.42        | 96.95                                         | 95.16        |
| GSTRUCT ann        | <b>93.87</b>              | 97.43        | 99.26        | 98.11        | <b>97.59</b>                        | <b>95.43</b> | 1.31                                  | 1.76        | 22.37                         | 8.77         | 18.12        | 18.89        | 97.24                                      | 97.02        | 97.24                                         | 95.51        |
| MapSplice          | 90.02                     | 93.95        | 98.61        | 94.61        | 96.83                               | 91.46        | 1.35                                  | 1.62        | 18.65                         | 7.32         | 16.98        | 15.09        | 95.94                                      | 90.35        | <b>98.26</b>                                  | <b>95.86</b> |
| MapSplice ann      | 90.01                     | 93.98        | 98.68        | 94.79        | 96.95                               | 91.67        | 1.34                                  | 1.64        | 18.51                         | 7.41         | 17.20        | 15.57        | 97.00                                      | 93.54        | 94.54                                         | 90.78        |
| PALMapper          | 91.15                     | n.a.         | 98.35        | 96.78        | 95.20                               | 93.03        | 3.05                                  | 3.74        | 21.62                         | n.a.         | 17.09        | 17.79        | 94.89                                      | 93.14        | 61.49                                         | 58.58        |
| PALMapper ann      | n.a.                      | n.a.         | 98.42        | 96.99        | 94.96                               | 92.99        | 3.37                                  | 4.00        | n.a.                          | n.a.         | 17.82        | 19.10        | 96.27                                      | 95.18        | 58.66                                         | 52.07        |
| PALMapper cons     | 52.14                     | n.a.         | 80.81        | 84.77        | 78.54                               | 81.91        | 1.70                                  | 2.86        | 3.82                          | n.a.         | 8.31         | 8.88         | 87.97                                      | 86.59        | 95.74                                         | 91.85        |
| PALMapper cons ann | n.a.                      | n.a.         | 97.74        | 94.32        | 94.85                               | 90.92        | 2.78                                  | 3.40        | n.a.                          | n.a.         | 15.44        | 15.94        | 92.65                                      | 89.47        | 78.79                                         | 71.63        |
| PASS               | 89.86                     | 92.78        | 96.97        | 90.15        | 90.83                               | 80.52        | 3.46                                  | 3.38        | 11.20                         | 5.90         | 12.48        | 10.72        | 91.18                                      | 85.10        | 86.33                                         | 76.30        |
| PASS cons          | 87.62                     | 90.29        | 95.99        | 87.48        | 90.47                               | 79.28        | 3.01                                  | 2.80        | 11.02                         | 5.77         | 12.42        | 10.49        | 91.10                                      | 84.94        | 89.41                                         | 80.37        |
| ReadsMap           | 77.18                     | 72.82        | 88.00        | 86.49        | 77.15                               | 72.65        | 9.87                                  | 13.83       | 22.84                         | <b>10.57</b> | <b>22.94</b> | <b>20.24</b> | 94.63                                      | 89.53        | 20.68                                         | 20.25        |
| SMALT              | 91.45                     | 92.25        | 96.73        | 96.34        | 91.62                               | 90.13        | 1.92                                  | 2.10        | 2.80                          | 1.51         | 3.32         | 3.15         | 35.34                                      | 34.88        | 30.69                                         | 28.43        |
| STAR 1-pass        | 91.52                     | 89.23        | 98.77        | 96.23        | 96.20                               | 92.21        | 1.70                                  | 1.96        | 14.02                         | 5.55         | 12.07        | 10.39        | 93.01                                      | 87.24        | 97.68                                         | 95.79        |
| STAR 1-pass ann    | 91.69                     | 89.26        | 98.85        | 96.71        | 97.19                               | 93.73        | 1.27                                  | 1.60        | 22.64                         | 7.10         | 17.32        | 16.49        | 96.00                                      | 93.23        | 91.72                                         | 89.80        |
| STAR 2-pass        | 91.68                     | 89.31        | 98.86        | 96.77        | 97.26                               | 93.85        | <b>1.23</b>                           | 1.58        | 24.24                         | 8.47         | 17.55        | 16.92        | 96.53                                      | 92.38        | 95.66                                         | 92.59        |
| STAR 2-pass ann    | 91.67                     | 89.34        | 98.85        | 96.77        | 97.26                               | 93.90        | 1.25                                  | 1.59        | <b>24.33</b>                  | 8.67         | 17.74        | 17.25        | 97.71                                      | 95.02        | 91.66                                         | 88.81        |
| TopHat1            | 84.22                     | 84.92        | 95.44        | 86.09        | 92.79                               | 83.82        | 2.44                                  | 2.27        | 15.12                         | 6.58         | 15.31        | 14.21        | 91.01                                      | 83.85        | 94.97                                         | 92.33        |
| TopHat1 ann        | 84.25                     | 84.96        | 95.58        | 86.53        | 92.94                               | 84.26        | 2.45                                  | 2.27        | 15.15                         | 6.65         | 15.48        | 14.70        | 93.59                                      | 88.99        | 94.62                                         | 92.15        |
| TopHat2            | 83.47                     | 85.10        | 93.96        | 77.93        | 91.96                               | 76.18        | 1.85                                  | 1.74        | 17.23                         | 7.32         | 16.41        | 13.31        | 91.78                                      | 86.23        | 95.04                                         | 93.36        |
| TopHat2 ann        | 84.52                     | 85.41        | 93.84        | 79.64        | 93.16                               | 78.10        | 1.46                                  | <b>1.55</b> | 22.11                         | 8.33         | 17.76        | 15.54        | 95.76                                      | 92.61        | 88.40                                         | 86.87        |

Results are based on primary alignments only. Data sets: Mean over K562 samples (K562), K562 whole cell replicate 1 (K562/1), mouse brain (M), simulation 1 (S1) and 2 (S2). Metrics: <sup>a</sup>percentage of sequenced or simulated reads mapped by each protocol; <sup>b</sup>percentage of all simulated bases that were correctly/incorrectly aligned; <sup>c</sup>number of splices in primary alignments divided by the number of sequenced reads; <sup>d</sup>junction discovery accuracy when requiring at least two supporting mappings per junction. All values are given as percentages. Bold indicates the highest or lowest value in each column. The PALMapper protocols were not applied to all data sets, as indicated (n.a.). The lower splice frequencies on mouse data are expected as a result of a more pronounced 3' bias in this data set (not shown).

**Supplementary Table 3. Alignment yield.**

|                                                 | Both mates uniquely mapped | Both mates multi-mapped | One mate uniquely and one multi-mapped | One mate uniquely mapped and one unaligned | One mate multi-mapped and one unaligned | Total mapped read pairs | Total mapped reads |
|-------------------------------------------------|----------------------------|-------------------------|----------------------------------------|--------------------------------------------|-----------------------------------------|-------------------------|--------------------|
| <b>A. K562 whole cell replicate 1</b>           |                            |                         |                                        |                                            |                                         |                         |                    |
| BAGET ann                                       | 87.78%                     | 0.13%                   | 0.98%                                  | 3.43%                                      | 0.24%                                   | 92.57%                  | 90.73%             |
| GEM ann                                         | 47.13%                     | 42.92%                  | 0.37%                                  | 0.77%                                      | 0.72%                                   | 91.91%                  | 91.17%             |
| GEM cons                                        | 47.45%                     | 42.57%                  | 0.37%                                  | 0.79%                                      | 0.73%                                   | 91.91%                  | 91.15%             |
| GEM cons ann                                    | 47.38%                     | 42.65%                  | 0.37%                                  | 0.78%                                      | 0.73%                                   | 91.91%                  | 91.16%             |
| GSNAP                                           | 79.50%                     | 10.98%                  | 0.04%                                  | 0.90%                                      | 0.35%                                   | 91.77%                  | 91.14%             |
| GSNAP ann                                       | 79.61%                     | 10.86%                  | 0.04%                                  | 0.92%                                      | 0.35%                                   | 91.78%                  | 91.15%             |
| GSTRUCT                                         | 74.48%                     | 16.01%                  | 0.04%                                  | 0.88%                                      | 0.39%                                   | 91.80%                  | 91.17%             |
| GSTRUCT ann                                     | 77.86%                     | 12.63%                  | 0.04%                                  | 0.92%                                      | 0.35%                                   | 91.80%                  | 91.16%             |
| MapSplice                                       | 83.31%                     | 0.01%                   | 0.05%                                  | 5.81%                                      | 0.88%                                   | 90.07%                  | 86.72%             |
| MapSplice ann                                   | 83.30%                     | 0.01%                   | 0.05%                                  | 5.81%                                      | 0.89%                                   | 90.07%                  | 86.71%             |
| PALMapper                                       | 32.84%                     | 36.97%                  | 18.72%                                 | 1.50%                                      | 1.67%                                   | 91.69%                  | 90.11%             |
| PALMapper cons                                  | 18.12%                     | 0.00%                   | 0.00%                                  | 24.23%                                     | 0.00%                                   | 42.36%                  | 30.24%             |
| PASS                                            | 82.13%                     | 0.33%                   | 0.18%                                  | 8.17%                                      | 0.05%                                   | 90.86%                  | 86.75%             |
| PASS cons                                       | 80.95%                     | 0.32%                   | 0.00%                                  | 6.65%                                      | 0.00%                                   | 87.93%                  | 84.60%             |
| ReadsMap                                        | 55.49%                     | 4.42%                   | 6.46%                                  | 11.17%                                     | 1.17%                                   | 78.70%                  | 72.54%             |
| SMALT                                           | 85.76%                     | 0.03%                   | 1.02%                                  | 6.49%                                      | 0.38%                                   | 93.68%                  | 90.24%             |
| STAR 1-pass                                     | 83.76%                     | 5.68%                   | 0.00%                                  | 0.00%                                      | 0.00%                                   | 89.45%                  | 89.45%             |
| STAR 1-pass ann                                 | 84.17%                     | 5.45%                   | 0.00%                                  | 0.00%                                      | 0.00%                                   | 89.61%                  | 89.61%             |
| STAR 2-pass                                     | 81.75%                     | 7.85%                   | 0.00%                                  | 0.00%                                      | 0.00%                                   | 89.60%                  | 89.60%             |
| STAR 2-pass ann                                 | 81.66%                     | 7.93%                   | 0.00%                                  | 0.00%                                      | 0.00%                                   | 89.59%                  | 89.59%             |
| TopHat1                                         | 73.35%                     | 4.09%                   | 0.00%                                  | 9.65%                                      | 1.39%                                   | 88.48%                  | 82.96%             |
| TopHat1 ann                                     | 73.39%                     | 4.11%                   | 0.00%                                  | 9.60%                                      | 1.39%                                   | 88.49%                  | 82.99%             |
| TopHat2                                         | 70.58%                     | 4.49%                   | 0.00%                                  | 11.29%                                     | 1.58%                                   | 87.95%                  | 81.51%             |
| TopHat2 ann                                     | 72.57%                     | 4.59%                   | 0.00%                                  | 10.63%                                     | 1.33%                                   | 89.12%                  | 83.14%             |
| <b>B. K562 whole cell replicate 2</b>           |                            |                         |                                        |                                            |                                         |                         |                    |
| BAGET ann                                       | 84.16%                     | 0.14%                   | 1.54%                                  | 8.79%                                      | 0.51%                                   | 95.14%                  | 90.49%             |
| GEM ann                                         | 47.12%                     | 41.72%                  | 0.49%                                  | 3.09%                                      | 2.43%                                   | 94.85%                  | 92.09%             |
| GEM cons                                        | 47.46%                     | 41.34%                  | 0.49%                                  | 3.14%                                      | 2.42%                                   | 94.85%                  | 92.07%             |
| GEM cons ann                                    | 47.40%                     | 41.42%                  | 0.49%                                  | 3.12%                                      | 2.42%                                   | 94.85%                  | 92.08%             |
| GSNAP                                           | 78.74%                     | 11.68%                  | 0.05%                                  | 2.35%                                      | 0.93%                                   | 93.75%                  | 92.11%             |
| GSNAP ann                                       | 78.86%                     | 11.61%                  | 0.05%                                  | 2.32%                                      | 0.93%                                   | 93.77%                  | 92.14%             |
| GSTRUCT                                         | 73.07%                     | 17.45%                  | 0.05%                                  | 2.22%                                      | 1.03%                                   | 93.82%                  | 92.19%             |
| GSTRUCT ann                                     | 74.60%                     | 15.91%                  | 0.05%                                  | 2.26%                                      | 0.99%                                   | 93.81%                  | 92.19%             |
| MapSplice                                       | 76.45%                     | 0.01%                   | 0.06%                                  | 12.23%                                     | 2.06%                                   | 90.82%                  | 83.68%             |
| MapSplice ann                                   | 76.43%                     | 0.01%                   | 0.06%                                  | 12.23%                                     | 2.07%                                   | 90.81%                  | 83.66%             |
| PALMapper                                       | 31.12%                     | 35.15%                  | 18.23%                                 | 4.72%                                      | 4.80%                                   | 94.03%                  | 89.27%             |
| PALMapper cons                                  | 34.52%                     | 0.00%                   | 0.00%                                  | 34.39%                                     | 0.00%                                   | 68.92%                  | 51.72%             |
| PASS                                            | 74.45%                     | 0.32%                   | 0.17%                                  | 17.64%                                     | 0.13%                                   | 92.72%                  | 83.83%             |
| PASS cons                                       | 73.19%                     | 0.32%                   | 0.00%                                  | 10.36%                                     | 0.00%                                   | 83.87%                  | 78.69%             |
| SMALT                                           | 86.08%                     | 0.02%                   | 0.75%                                  | 6.91%                                      | 0.21%                                   | 93.96%                  | 90.40%             |
| STAR 1-pass                                     | 82.90%                     | 5.99%                   | 0.00%                                  | 0.00%                                      | 0.00%                                   | 88.89%                  | 88.89%             |
| STAR 1-pass ann                                 | 83.68%                     | 5.68%                   | 0.00%                                  | 0.00%                                      | 0.00%                                   | 89.36%                  | 89.36%             |
| STAR 2-pass                                     | 81.25%                     | 8.10%                   | 0.00%                                  | 0.00%                                      | 0.00%                                   | 89.36%                  | 89.36%             |
| STAR 2-pass ann                                 | 81.15%                     | 8.20%                   | 0.00%                                  | 0.00%                                      | 0.00%                                   | 89.35%                  | 89.35%             |
| TopHat1                                         | 62.54%                     | 3.61%                   | 0.00%                                  | 16.54%                                     | 2.34%                                   | 85.03%                  | 75.59%             |
| TopHat1 ann                                     | 62.56%                     | 3.63%                   | 0.00%                                  | 16.50%                                     | 2.35%                                   | 85.04%                  | 75.62%             |
| TopHat2                                         | 59.15%                     | 3.97%                   | 0.00%                                  | 17.63%                                     | 2.37%                                   | 83.12%                  | 73.12%             |
| TopHat2 ann                                     | 60.74%                     | 3.85%                   | 0.00%                                  | 17.39%                                     | 2.16%                                   | 84.15%                  | 74.37%             |
| <b>C. K562 cytoplasmic fraction replicate 1</b> |                            |                         |                                        |                                            |                                         |                         |                    |
| BAGET ann                                       | 91.83%                     | 0.11%                   | 1.00%                                  | 3.51%                                      | 0.29%                                   | 96.74%                  | 94.84%             |
| GEM ann                                         | 52.24%                     | 42.33%                  | 0.63%                                  | 0.72%                                      | 0.72%                                   | 96.63%                  | 95.91%             |
| GEM cons                                        | 52.66%                     | 41.87%                  | 0.63%                                  | 0.75%                                      | 0.72%                                   | 96.63%                  | 95.90%             |
| GEM cons ann                                    | 52.57%                     | 41.98%                  | 0.63%                                  | 0.74%                                      | 0.72%                                   | 96.63%                  | 95.90%             |
| GSNAP                                           | 82.59%                     | 12.69%                  | 0.12%                                  | 0.68%                                      | 0.31%                                   | 96.39%                  | 95.89%             |
| GSNAP ann                                       | 82.53%                     | 12.75%                  | 0.12%                                  | 0.69%                                      | 0.31%                                   | 96.40%                  | 95.90%             |
| GSTRUCT                                         | 77.97%                     | 17.34%                  | 0.12%                                  | 0.79%                                      | 0.31%                                   | 96.53%                  | 95.98%             |
| GSTRUCT ann                                     | 79.34%                     | 15.97%                  | 0.12%                                  | 0.81%                                      | 0.30%                                   | 96.53%                  | 95.98%             |
| MapSplice                                       | 90.31%                     | 0.01%                   | 0.09%                                  | 4.29%                                      | 0.63%                                   | 95.33%                  | 92.87%             |
| MapSplice ann                                   | 90.29%                     | 0.01%                   | 0.09%                                  | 4.31%                                      | 0.63%                                   | 95.32%                  | 92.86%             |
| PASS                                            | 89.47%                     | 0.19%                   | 0.19%                                  | 5.90%                                      | 0.03%                                   | 95.78%                  | 92.82%             |
| PASS cons                                       | 88.33%                     | 0.18%                   | 0.00%                                  | 5.51%                                      | 0.00%                                   | 94.03%                  | 91.27%             |
| ReadsMap                                        | 61.37%                     | 5.60%                   | 9.37%                                  | 10.00%                                     | 1.02%                                   | 87.37%                  | 81.86%             |
| SMALT                                           | 88.12%                     | 0.00%                   | 0.49%                                  | 5.63%                                      | 0.14%                                   | 94.39%                  | 91.50%             |
| STAR 1-pass                                     | 87.75%                     | 5.96%                   | 0.00%                                  | 0.00%                                      | 0.00%                                   | 93.71%                  | 93.71%             |
| STAR 1-pass ann                                 | 87.72%                     | 6.12%                   | 0.00%                                  | 0.00%                                      | 0.00%                                   | 93.84%                  | 93.84%             |
| STAR 2-pass                                     | 83.73%                     | 10.08%                  | 0.00%                                  | 0.00%                                      | 0.00%                                   | 93.81%                  | 93.81%             |
| STAR 2-pass ann                                 | 83.60%                     | 10.20%                  | 0.00%                                  | 0.00%                                      | 0.00%                                   | 93.80%                  | 93.80%             |
| TopHat1                                         | 77.44%                     | 4.61%                   | 0.00%                                  | 9.24%                                      | 1.18%                                   | 92.47%                  | 87.26%             |
| TopHat1 ann                                     | 77.46%                     | 4.65%                   | 0.00%                                  | 9.18%                                      | 1.18%                                   | 92.48%                  | 87.29%             |
| TopHat2                                         | 75.66%                     | 5.96%                   | 0.00%                                  | 9.56%                                      | 1.25%                                   | 92.43%                  | 87.03%             |
| TopHat2 ann                                     | 77.35%                     | 6.01%                   | 0.00%                                  | 8.96%                                      | 1.08%                                   | 93.39%                  | 88.37%             |
| <b>D. K562 cytoplasmic fraction replicate 2</b> |                            |                         |                                        |                                            |                                         |                         |                    |
| BAGET ann                                       | 90.78%                     | 0.12%                   | 1.03%                                  | 3.12%                                      | 0.25%                                   | 95.30%                  | 93.61%             |
| GEM ann                                         | 44.72%                     | 49.11%                  | 0.46%                                  | 0.51%                                      | 0.40%                                   | 95.20%                  | 94.74%             |
| GEM cons                                        | 45.14%                     | 48.67%                  | 0.46%                                  | 0.54%                                      | 0.40%                                   | 95.20%                  | 94.73%             |
| GEM cons ann                                    | 45.05%                     | 48.78%                  | 0.46%                                  | 0.52%                                      | 0.40%                                   | 95.20%                  | 94.74%             |
| GSNAP                                           | 83.12%                     | 11.16%                  | 0.11%                                  | 0.56%                                      | 0.17%                                   | 95.12%                  | 94.75%             |
| GSNAP ann                                       | 83.11%                     | 11.18%                  | 0.11%                                  | 0.57%                                      | 0.17%                                   | 95.13%                  | 94.76%             |

|                                             | Both mates uniquely mapped | Both mates multi-mapped | One mate uniquely and one multi-mapped | One mate uniquely mapped and one unaligned | One mate multi-mapped and one unaligned | Total mapped read pairs | Total mapped reads |
|---------------------------------------------|----------------------------|-------------------------|----------------------------------------|--------------------------------------------|-----------------------------------------|-------------------------|--------------------|
| GSTRUCT                                     | 79.62%                     | 14.68%                  | 0.11%                                  | 0.66%                                      | 0.17%                                   | 95.25%                  | 94.83%             |
| GSTRUCT ann                                 | 81.25%                     | 13.06%                  | 0.10%                                  | 0.67%                                      | 0.16%                                   | 95.25%                  | 94.83%             |
| MapSplice                                   | 90.66%                     | 0.01%                   | 0.08%                                  | 3.31%                                      | 0.34%                                   | 94.40%                  | 92.58%             |
| MapSplice ann                               | 90.60%                     | 0.01%                   | 0.08%                                  | 3.36%                                      | 0.34%                                   | 94.40%                  | 92.55%             |
| PASS                                        | 88.31%                     | 0.20%                   | 0.18%                                  | 5.90%                                      | 0.03%                                   | 94.63%                  | 91.66%             |
| PASS cons                                   | 87.05%                     | 0.20%                   | 0.00%                                  | 5.63%                                      | 0.00%                                   | 92.87%                  | 90.05%             |
| SMALT                                       | 87.24%                     | 0.00%                   | 0.55%                                  | 5.99%                                      | 0.17%                                   | 93.94%                  | 90.86%             |
| STAR 1-pass                                 | 86.92%                     | 5.63%                   | 0.00%                                  | 0.00%                                      | 0.00%                                   | 92.55%                  | 92.55%             |
| STAR 1-pass ann                             | 86.65%                     | 6.02%                   | 0.00%                                  | 0.00%                                      | 0.00%                                   | 92.67%                  | 92.67%             |
| STAR 2-pass                                 | 82.97%                     | 9.67%                   | 0.00%                                  | 0.00%                                      | 0.00%                                   | 92.64%                  | 92.64%             |
| STAR 2-pass ann                             | 82.83%                     | 9.79%                   | 0.00%                                  | 0.00%                                      | 0.00%                                   | 92.63%                  | 92.63%             |
| TopHat1                                     | 75.71%                     | 4.51%                   | 0.00%                                  | 9.96%                                      | 1.11%                                   | 91.29%                  | 85.75%             |
| TopHat1 ann                                 | 75.79%                     | 4.52%                   | 0.00%                                  | 9.88%                                      | 1.11%                                   | 91.30%                  | 85.80%             |
| TopHat2                                     | 73.38%                     | 5.91%                   | 0.00%                                  | 10.80%                                     | 1.20%                                   | 91.30%                  | 85.29%             |
| TopHat2 ann                                 | 75.16%                     | 6.32%                   | 0.00%                                  | 10.00%                                     | 1.07%                                   | 92.55%                  | 87.02%             |
| <b>E. K562 nuclear fraction replicate 1</b> |                            |                         |                                        |                                            |                                         |                         |                    |
| BAGET ann                                   | 92.05%                     | 0.25%                   | 1.02%                                  | 2.65%                                      | 0.40%                                   | 96.36%                  | 94.84%             |
| GEM ann                                     | 64.76%                     | 29.89%                  | 0.40%                                  | 0.72%                                      | 0.45%                                   | 96.22%                  | 95.63%             |
| GEM cons                                    | 65.17%                     | 29.45%                  | 0.40%                                  | 0.74%                                      | 0.45%                                   | 96.22%                  | 95.62%             |
| GEM cons ann                                | 65.11%                     | 29.52%                  | 0.40%                                  | 0.73%                                      | 0.45%                                   | 96.22%                  | 95.62%             |
| GSNAP                                       | 87.22%                     | 7.68%                   | 0.06%                                  | 0.65%                                      | 0.26%                                   | 95.87%                  | 95.42%             |
| GSNAP ann                                   | 87.25%                     | 7.66%                   | 0.06%                                  | 0.65%                                      | 0.26%                                   | 95.88%                  | 95.43%             |
| GSTRUCT                                     | 88.12%                     | 6.84%                   | 0.06%                                  | 0.71%                                      | 0.21%                                   | 95.93%                  | 95.47%             |
| GSTRUCT ann                                 | 88.70%                     | 6.25%                   | 0.06%                                  | 0.71%                                      | 0.21%                                   | 95.93%                  | 95.47%             |
| MapSplice                                   | 90.43%                     | 0.01%                   | 0.08%                                  | 4.10%                                      | 0.55%                                   | 95.16%                  | 92.84%             |
| MapSplice ann                               | 90.43%                     | 0.01%                   | 0.08%                                  | 4.09%                                      | 0.55%                                   | 95.16%                  | 92.84%             |
| PALMapper                                   | 46.25%                     | 24.11%                  | 21.33%                                 | 1.87%                                      | 2.00%                                   | 95.57%                  | 93.64%             |
| PALMapper cons                              | 37.19%                     | 2.26%                   | 3.25%                                  | 33.81%                                     | 3.40%                                   | 79.90%                  | 61.29%             |
| PASS                                        | 89.41%                     | 0.39%                   | 0.26%                                  | 5.43%                                      | 0.04%                                   | 95.53%                  | 92.79%             |
| PASS cons                                   | 88.22%                     | 0.38%                   | 0.00%                                  | 5.23%                                      | 0.00%                                   | 93.83%                  | 91.22%             |
| ReadsMap                                    | 62.17%                     | 2.93%                   | 4.98%                                  | 12.99%                                     | 1.13%                                   | 84.20%                  | 77.14%             |
| SMALT                                       | 90.82%                     | 0.01%                   | 0.54%                                  | 3.88%                                      | 0.17%                                   | 95.42%                  | 93.40%             |
| STAR 1-pass                                 | 88.94%                     | 4.06%                   | 0.00%                                  | 0.00%                                      | 0.00%                                   | 93.00%                  | 93.00%             |
| STAR 1-pass ann                             | 88.77%                     | 4.31%                   | 0.00%                                  | 0.00%                                      | 0.00%                                   | 93.08%                  | 93.08%             |
| STAR 2-pass                                 | 87.00%                     | 6.08%                   | 0.00%                                  | 0.00%                                      | 0.00%                                   | 93.08%                  | 93.08%             |
| STAR 2-pass ann                             | 86.95%                     | 6.13%                   | 0.00%                                  | 0.00%                                      | 0.00%                                   | 93.07%                  | 93.07%             |
| TopHat1                                     | 78.26%                     | 3.74%                   | 0.00%                                  | 9.99%                                      | 1.19%                                   | 93.19%                  | 87.59%             |
| TopHat1 ann                                 | 78.29%                     | 3.75%                   | 0.00%                                  | 9.96%                                      | 1.19%                                   | 93.19%                  | 87.62%             |
| TopHat2                                     | 77.30%                     | 4.10%                   | 0.00%                                  | 10.23%                                     | 1.26%                                   | 92.88%                  | 87.14%             |
| TopHat2 ann                                 | 78.12%                     | 3.71%                   | 0.00%                                  | 9.97%                                      | 1.07%                                   | 92.87%                  | 87.35%             |
| <b>F. K562 nuclear fraction replicate 2</b> |                            |                         |                                        |                                            |                                         |                         |                    |
| BAGET ann                                   | 90.76%                     | 0.19%                   | 0.80%                                  | 2.47%                                      | 0.34%                                   | 94.55%                  | 93.15%             |
| GEM ann                                     | 64.61%                     | 28.22%                  | 0.32%                                  | 0.66%                                      | 0.36%                                   | 94.17%                  | 93.66%             |
| GEM cons                                    | 64.95%                     | 27.85%                  | 0.32%                                  | 0.68%                                      | 0.37%                                   | 94.17%                  | 93.64%             |
| GEM cons ann                                | 64.89%                     | 27.92%                  | 0.32%                                  | 0.67%                                      | 0.36%                                   | 94.17%                  | 93.65%             |
| GSNAP                                       | 86.38%                     | 6.72%                   | 0.05%                                  | 0.55%                                      | 0.18%                                   | 93.88%                  | 93.52%             |
| GSNAP ann                                   | 86.39%                     | 6.71%                   | 0.05%                                  | 0.55%                                      | 0.18%                                   | 93.89%                  | 93.52%             |
| GSTRUCT                                     | 86.95%                     | 6.19%                   | 0.04%                                  | 0.62%                                      | 0.15%                                   | 93.96%                  | 93.57%             |
| GSTRUCT ann                                 | 87.68%                     | 5.46%                   | 0.04%                                  | 0.62%                                      | 0.15%                                   | 93.96%                  | 93.57%             |
| MapSplice                                   | 89.59%                     | 0.01%                   | 0.07%                                  | 3.22%                                      | 0.35%                                   | 93.24%                  | 91.46%             |
| MapSplice ann                               | 89.59%                     | 0.01%                   | 0.07%                                  | 3.22%                                      | 0.35%                                   | 93.24%                  | 91.46%             |
| PALMapper                                   | 45.82%                     | 22.50%                  | 21.39%                                 | 1.80%                                      | 1.92%                                   | 93.43%                  | 91.57%             |
| PALMapper cons                              | 42.29%                     | 2.43%                   | 3.46%                                  | 31.26%                                     | 2.97%                                   | 82.42%                  | 65.30%             |
| PASS                                        | 88.47%                     | 0.43%                   | 0.26%                                  | 4.24%                                      | 0.04%                                   | 93.44%                  | 91.30%             |
| PASS cons                                   | 87.31%                     | 0.42%                   | 0.00%                                  | 4.37%                                      | 0.00%                                   | 92.09%                  | 89.91%             |
| SMALT                                       | 89.36%                     | 0.01%                   | 0.55%                                  | 4.46%                                      | 0.23%                                   | 94.61%                  | 92.26%             |
| STAR 1-pass                                 | 87.62%                     | 3.89%                   | 0.00%                                  | 0.00%                                      | 0.00%                                   | 91.50%                  | 91.50%             |
| STAR 1-pass ann                             | 87.34%                     | 4.23%                   | 0.00%                                  | 0.00%                                      | 0.00%                                   | 91.57%                  | 91.57%             |
| STAR 2-pass                                 | 85.67%                     | 5.91%                   | 0.00%                                  | 0.00%                                      | 0.00%                                   | 91.57%                  | 91.57%             |
| STAR 2-pass ann                             | 85.61%                     | 5.96%                   | 0.00%                                  | 0.00%                                      | 0.00%                                   | 91.57%                  | 91.57%             |
| TopHat1                                     | 78.17%                     | 3.07%                   | 0.00%                                  | 8.95%                                      | 0.91%                                   | 91.10%                  | 86.17%             |
| TopHat1 ann                                 | 78.20%                     | 3.08%                   | 0.00%                                  | 8.92%                                      | 0.91%                                   | 91.10%                  | 86.19%             |
| TopHat2                                     | 78.66%                     | 3.68%                   | 0.00%                                  | 7.91%                                      | 0.87%                                   | 91.12%                  | 86.73%             |
| TopHat2 ann                                 | 79.32%                     | 3.34%                   | 0.00%                                  | 7.64%                                      | 0.72%                                   | 91.03%                  | 86.85%             |
| <b>G. Mouse brain</b>                       |                            |                         |                                        |                                            |                                         |                         |                    |
| BAGET ann                                   | 90.34%                     | 0.28%                   | 1.81%                                  | 5.87%                                      | 0.67%                                   | 98.98%                  | 95.71%             |
| GEM ann                                     | 62.53%                     | 31.64%                  | 2.89%                                  | 0.42%                                      | 2.12%                                   | 99.60%                  | 98.33%             |
| GEM cons                                    | 62.80%                     | 31.33%                  | 2.89%                                  | 0.45%                                      | 2.12%                                   | 99.60%                  | 98.31%             |
| GEM cons ann                                | 62.72%                     | 31.44%                  | 2.89%                                  | 0.43%                                      | 2.11%                                   | 99.60%                  | 98.33%             |
| GSNAP                                       | 83.92%                     | 9.54%                   | 1.51%                                  | 1.46%                                      | 2.01%                                   | 98.45%                  | 96.71%             |
| GSNAP ann                                   | 83.88%                     | 9.59%                   | 1.51%                                  | 1.46%                                      | 2.01%                                   | 98.45%                  | 96.72%             |
| GSTRUCT                                     | 81.63%                     | 13.29%                  | 1.23%                                  | 1.00%                                      | 1.56%                                   | 98.71%                  | 97.44%             |
| GSTRUCT ann                                 | 81.94%                     | 13.00%                  | 1.20%                                  | 1.01%                                      | 1.56%                                   | 98.71%                  | 97.43%             |
| MapSplice                                   | 88.42%                     | 0.24%                   | 1.63%                                  | 5.89%                                      | 1.42%                                   | 97.60%                  | 93.95%             |
| MapSplice ann                               | 88.49%                     | 0.24%                   | 1.63%                                  | 5.81%                                      | 1.43%                                   | 97.60%                  | 93.98%             |
| PASS                                        | 87.38%                     | 0.31%                   | 0.33%                                  | 9.48%                                      | 0.04%                                   | 97.54%                  | 92.78%             |
| PASS cons                                   | 84.99%                     | 0.27%                   | 0.00%                                  | 10.07%                                     | 0.00%                                   | 95.33%                  | 90.29%             |
| ReadsMap                                    | 57.26%                     | 3.68%                   | 3.20%                                  | 16.36%                                     | 0.99%                                   | 81.50%                  | 72.82%             |
| SMALT                                       | 88.66%                     | 0.01%                   | 0.86%                                  | 5.27%                                      | 0.18%                                   | 94.97%                  | 92.25%             |
| STAR 1-pass                                 | 84.28%                     | 4.95%                   | 0.00%                                  | 0.00%                                      | 0.00%                                   | 89.23%                  | 89.23%             |
| STAR 1-pass ann                             | 83.98%                     | 5.28%                   | 0.00%                                  | 0.00%                                      | 0.00%                                   | 89.26%                  | 89.26%             |
| STAR 2-pass                                 | 83.23%                     | 6.08%                   | 0.00%                                  | 0.00%                                      | 0.00%                                   | 89.31%                  | 89.31%             |



|                        | Both mates uniquely mapped | Both mates multi-mapped | One mate uniquely and one multi-mapped | One mate uniquely mapped and one unaligned | One mate multi-mapped and one unaligned | Total mapped read pairs | Total mapped reads |
|------------------------|----------------------------|-------------------------|----------------------------------------|--------------------------------------------|-----------------------------------------|-------------------------|--------------------|
| STAR 2-pass ann        | 83.26%                     | 6.07%                   | 0.00%                                  | 0.00%                                      | 0.00%                                   | 89.34%                  | 89.34%             |
| TopHat1                | 75.09%                     | 2.68%                   | 0.00%                                  | 11.08%                                     | 3.21%                                   | 92.06%                  | 84.92%             |
| TopHat1 ann            | 75.16%                     | 2.70%                   | 0.00%                                  | 11.00%                                     | 3.21%                                   | 92.07%                  | 84.96%             |
| TopHat2                | 74.51%                     | 4.14%                   | 0.00%                                  | 10.51%                                     | 2.38%                                   | 91.54%                  | 85.10%             |
| TopHat2 ann            | 76.35%                     | 2.71%                   | 0.00%                                  | 10.52%                                     | 2.18%                                   | 91.75%                  | 85.41%             |
| <b>H. Simulation 1</b> |                            |                         |                                        |                                            |                                         |                         |                    |
| BAGET ann              | 96.37%                     | 0.12%                   | 0.95%                                  | 2.08%                                      | 0.18%                                   | 99.71%                  | 98.58%             |
| GEM ann                | 67.92%                     | 31.68%                  | 0.20%                                  | 0.11%                                      | 0.08%                                   | 100.00%                 | 99.90%             |
| GEM cons               | 68.18%                     | 31.38%                  | 0.20%                                  | 0.15%                                      | 0.10%                                   | 100.00%                 | 99.88%             |
| GEM cons ann           | 68.04%                     | 31.55%                  | 0.20%                                  | 0.12%                                      | 0.08%                                   | 100.00%                 | 99.90%             |
| GSNAP                  | 94.59%                     | 4.54%                   | 0.00%                                  | 0.18%                                      | 0.05%                                   | 99.35%                  | 99.24%             |
| GSNAP ann              | 94.65%                     | 4.49%                   | 0.00%                                  | 0.19%                                      | 0.05%                                   | 99.37%                  | 99.25%             |
| GSTRUCT                | 94.54%                     | 4.60%                   | 0.00%                                  | 0.20%                                      | 0.04%                                   | 99.38%                  | 99.26%             |
| GSTRUCT ann            | 95.37%                     | 3.77%                   | 0.00%                                  | 0.20%                                      | 0.04%                                   | 99.38%                  | 99.26%             |
| MapSplice              | 95.80%                     | 2.06%                   | 0.01%                                  | 1.38%                                      | 0.08%                                   | 99.34%                  | 98.61%             |
| MapSplice ann          | 95.95%                     | 2.06%                   | 0.01%                                  | 1.24%                                      | 0.08%                                   | 99.34%                  | 98.68%             |
| PALMapper              | 51.06%                     | 22.92%                  | 23.26%                                 | 1.30%                                      | 0.91%                                   | 99.46%                  | 98.35%             |
| PALMapper ann          | 49.88%                     | 23.48%                  | 24.02%                                 | 1.21%                                      | 0.88%                                   | 99.46%                  | 98.42%             |
| PALMapper cons         | 57.35%                     | 3.89%                   | 7.10%                                  | 22.26%                                     | 2.67%                                   | 93.27%                  | 80.81%             |
| PALMapper cons ann     | 62.61%                     | 16.14%                  | 17.49%                                 | 2.22%                                      | 0.78%                                   | 99.25%                  | 97.74%             |
| PASS                   | 94.53%                     | 0.44%                   | 0.23%                                  | 3.52%                                      | 0.02%                                   | 98.73%                  | 96.97%             |
| PASS cons              | 93.82%                     | 0.44%                   | 0.00%                                  | 3.46%                                      | 0.00%                                   | 97.72%                  | 95.99%             |
| ReadsMap               | 75.90%                     | 2.17%                   | 4.29%                                  | 10.83%                                     | 0.45%                                   | 93.64%                  | 88.00%             |
| SMALT                  | 95.79%                     | 0.01%                   | 0.25%                                  | 1.30%                                      | 0.04%                                   | 97.39%                  | 96.73%             |
| STAR 1-pass            | 95.97%                     | 2.80%                   | 0.00%                                  | 0.00%                                      | 0.00%                                   | 98.77%                  | 98.77%             |
| STAR 1-pass ann        | 95.44%                     | 3.41%                   | 0.00%                                  | 0.00%                                      | 0.00%                                   | 98.85%                  | 98.85%             |
| STAR 2-pass            | 95.36%                     | 3.50%                   | 0.00%                                  | 0.00%                                      | 0.00%                                   | 98.86%                  | 98.86%             |
| STAR 2-pass ann        | 95.18%                     | 3.67%                   | 0.00%                                  | 0.00%                                      | 0.00%                                   | 98.85%                  | 98.85%             |
| TopHat1                | 90.80%                     | 1.98%                   | 0.00%                                  | 5.04%                                      | 0.27%                                   | 98.10%                  | 95.44%             |
| TopHat1 ann            | 91.05%                     | 2.00%                   | 0.00%                                  | 4.78%                                      | 0.27%                                   | 98.10%                  | 95.58%             |
| TopHat2                | 88.00%                     | 2.46%                   | 0.00%                                  | 6.64%                                      | 0.36%                                   | 97.46%                  | 93.96%             |
| TopHat2 ann            | 88.38%                     | 2.45%                   | 0.00%                                  | 5.77%                                      | 0.26%                                   | 96.85%                  | 93.84%             |
| <b>I. Simulation 2</b> |                            |                         |                                        |                                            |                                         |                         |                    |
| BAGET ann              | 91.36%                     | 0.35%                   | 2.47%                                  | 4.66%                                      | 0.51%                                   | 99.36%                  | 96.77%             |
| GEM ann                | 71.15%                     | 27.08%                  | 0.58%                                  | 0.74%                                      | 0.44%                                   | 99.99%                  | 99.40%             |
| GEM cons               | 71.76%                     | 26.38%                  | 0.59%                                  | 0.81%                                      | 0.45%                                   | 99.99%                  | 99.36%             |
| GEM cons ann           | 71.50%                     | 26.72%                  | 0.59%                                  | 0.75%                                      | 0.44%                                   | 99.99%                  | 99.39%             |
| GSNAP                  | 93.95%                     | 3.60%                   | 0.01%                                  | 0.65%                                      | 0.14%                                   | 98.35%                  | 97.95%             |
| GSNAP ann              | 93.97%                     | 3.58%                   | 0.01%                                  | 0.68%                                      | 0.14%                                   | 98.39%                  | 97.97%             |
| GSTRUCT                | 94.11%                     | 3.57%                   | 0.01%                                  | 0.71%                                      | 0.12%                                   | 98.52%                  | 98.11%             |
| GSTRUCT ann            | 94.82%                     | 2.87%                   | 0.01%                                  | 0.72%                                      | 0.11%                                   | 98.52%                  | 98.11%             |
| MapSplice              | 89.26%                     | 1.75%                   | 0.02%                                  | 6.88%                                      | 0.26%                                   | 98.19%                  | 94.61%             |
| MapSplice ann          | 89.59%                     | 1.74%                   | 0.03%                                  | 6.61%                                      | 0.25%                                   | 98.21%                  | 94.79%             |
| PALMapper              | 47.73%                     | 19.09%                  | 27.68%                                 | 2.70%                                      | 1.87%                                   | 99.06%                  | 96.78%             |
| PALMapper ann          | 44.90%                     | 20.84%                  | 29.17%                                 | 2.37%                                      | 1.80%                                   | 99.08%                  | 96.99%             |
| PALMapper cons         | 56.73%                     | 5.78%                   | 12.15%                                 | 16.52%                                     | 3.70%                                   | 94.88%                  | 84.77%             |
| PALMapper cons ann     | 58.91%                     | 10.22%                  | 21.30%                                 | 5.85%                                      | 1.92%                                   | 98.21%                  | 94.32%             |
| PASS                   | 83.60%                     | 0.39%                   | 0.29%                                  | 11.70%                                     | 0.05%                                   | 96.03%                  | 90.15%             |
| PASS cons              | 82.52%                     | 0.38%                   | 0.00%                                  | 9.15%                                      | 0.00%                                   | 92.06%                  | 87.48%             |
| ReadsMap               | 73.71%                     | 2.06%                   | 2.99%                                  | 14.63%                                     | 0.81%                                   | 94.21%                  | 86.49%             |
| SMALT                  | 94.92%                     | 0.01%                   | 0.48%                                  | 1.82%                                      | 0.04%                                   | 97.27%                  | 96.34%             |
| STAR 1-pass            | 93.36%                     | 2.87%                   | 0.00%                                  | 0.00%                                      | 0.00%                                   | 96.23%                  | 96.23%             |
| STAR 1-pass ann        | 93.33%                     | 3.38%                   | 0.00%                                  | 0.00%                                      | 0.00%                                   | 96.71%                  | 96.71%             |
| STAR 2-pass            | 93.24%                     | 3.53%                   | 0.00%                                  | 0.00%                                      | 0.00%                                   | 96.77%                  | 96.77%             |
| STAR 2-pass ann        | 93.09%                     | 3.69%                   | 0.00%                                  | 0.00%                                      | 0.00%                                   | 96.77%                  | 96.77%             |
| TopHat1                | 75.36%                     | 1.71%                   | 0.00%                                  | 17.25%                                     | 0.80%                                   | 95.11%                  | 86.09%             |
| TopHat1 ann            | 76.09%                     | 1.74%                   | 0.00%                                  | 16.62%                                     | 0.79%                                   | 95.24%                  | 86.53%             |
| TopHat2                | 63.27%                     | 1.88%                   | 0.00%                                  | 24.52%                                     | 1.03%                                   | 90.70%                  | 77.93%             |
| TopHat2 ann            | 65.70%                     | 2.11%                   | 0.00%                                  | 22.70%                                     | 0.98%                                   | 91.48%                  | 79.64%             |

Percentage of sequenced or simulated read pairs mapped by each protocol, for the data sets used in this study. Read pairs are classified by the number of alignments reported per mate. These results are also shown graphically in Figure 1.

**Supplementary Table 4.** Accuracy among unique and ambiguous mappings of simulated reads.

|                        | Uniquely mapped reads | Multi-mapped reads | Proportion of unique mappings that are perfect | Proportion of multi-mapped reads for which the primary alignment is perfect | Proportion correctly aligned bases for unique mappings | Proportion correctly aligned bases for primary alignments of multi-mapped reads |
|------------------------|-----------------------|--------------------|------------------------------------------------|-----------------------------------------------------------------------------|--------------------------------------------------------|---------------------------------------------------------------------------------|
| <b>A. Simulation 1</b> |                       |                    |                                                |                                                                             |                                                        |                                                                                 |
| BAGET ann              | 97.75%                | 0.74%              | 86.99%                                         | 0.00%                                                                       | 94.58%                                                 | 81.61%                                                                          |
| GEM ann                | 70.79%                | 29.11%             | 96.99%                                         | 84.92%                                                                      | 99.56%                                                 | 89.76%                                                                          |
| GEM cons               | 71.08%                | 28.79%             | 96.84%                                         | 84.91%                                                                      | 99.53%                                                 | 89.68%                                                                          |
| GEM cons ann           | 70.93%                | 28.97%             | 96.95%                                         | 84.87%                                                                      | 99.56%                                                 | 89.71%                                                                          |
| GSNAP                  | 95.65%                | 3.57%              | 86.76%                                         | 53.56%                                                                      | 99.61%                                                 | 61.17%                                                                          |
| GSNAP ann              | 95.72%                | 3.52%              | 90.94%                                         | 57.60%                                                                      | 99.92%                                                 | 63.45%                                                                          |
| GSTRUCT                | 95.70%                | 3.55%              | 91.36%                                         | 45.81%                                                                      | 99.80%                                                 | 50.15%                                                                          |
| GSTRUCT ann            | 96.59%                | 2.66%              | 91.39%                                         | 51.99%                                                                      | 99.81%                                                 | 57.11%                                                                          |
| MapSplice              | 96.70%                | 1.85%              | 97.56%                                         | 47.55%                                                                      | 99.59%                                                 | 48.24%                                                                          |
| MapSplice ann          | 96.79%                | 1.84%              | 97.41%                                         | 47.35%                                                                      | 99.60%                                                 | 48.09%                                                                          |
| PALMapper              | 68.50%                | 29.75%             | 99.03%                                         | 78.85%                                                                      | 99.86%                                                 | 90.06%                                                                          |
| PALMapper ann          | 67.57%                | 30.75%             | 99.42%                                         | 78.30%                                                                      | 99.91%                                                 | 89.23%                                                                          |
| PALMapper cons         | 73.43%                | 6.81%              | 98.59%                                         | 72.65%                                                                      | 99.80%                                                 | 77.15%                                                                          |
| PALMapper cons ann     | 77.83%                | 19.80%             | 98.01%                                         | 69.56%                                                                      | 99.86%                                                 | 86.54%                                                                          |
| PASS                   | 96.24%                | 0.61%              | 49.99%                                         | 17.00%                                                                      | 96.71%                                                 | 35.62%                                                                          |
| PASS cons              | 95.35%                | 0.48%              | 50.42%                                         | 21.36%                                                                      | 97.04%                                                 | 43.92%                                                                          |
| ReadsMap               | 83.60%                | 3.42%              | 89.98%                                         | 34.43%                                                                      | 90.85%                                                 | 35.26%                                                                          |
| SMALT                  | 96.72%                | 0.17%              | 75.65%                                         | 0.00%                                                                       | 97.98%                                                 | 68.26%                                                                          |
| STAR 1-pass            | 96.14%                | 2.58%              | 88.01%                                         | 46.40%                                                                      | 99.51%                                                 | 52.08%                                                                          |
| STAR 1-pass ann        | 95.56%                | 3.25%              | 92.96%                                         | 55.74%                                                                      | 99.83%                                                 | 65.83%                                                                          |
| STAR 2-pass            | 95.48%                | 3.34%              | 93.32%                                         | 58.30%                                                                      | 99.83%                                                 | 67.75%                                                                          |
| STAR 2-pass ann        | 95.29%                | 3.53%              | 93.41%                                         | 58.83%                                                                      | 99.84%                                                 | 68.81%                                                                          |
| TopHat1                | 93.37%                | 1.86%              | 96.52%                                         | 40.24%                                                                      | 98.53%                                                 | 42.38%                                                                          |
| TopHat1 ann            | 93.51%                | 1.88%              | 96.47%                                         | 40.64%                                                                      | 98.53%                                                 | 43.01%                                                                          |
| TopHat2                | 91.38%                | 2.43%              | 98.93%                                         | 43.04%                                                                      | 99.41%                                                 | 46.14%                                                                          |
| TopHat2 ann            | 92.00%                | 2.62%              | 99.29%                                         | 49.48%                                                                      | 99.67%                                                 | 55.92%                                                                          |
| <b>B. Simulation 2</b> |                       |                    |                                                |                                                                             |                                                        |                                                                                 |
| BAGET ann              | 94.93%                | 1.84%              | 84.65%                                         | 0.00%                                                                       | 94.84%                                                 | 83.16%                                                                          |
| GEM ann                | 71.85%                | 27.55%             | 92.36%                                         | 75.75%                                                                      | 98.83%                                                 | 85.69%                                                                          |
| GEM cons               | 72.50%                | 26.85%             | 92.09%                                         | 75.59%                                                                      | 98.79%                                                 | 85.33%                                                                          |
| GEM cons ann           | 72.21%                | 27.18%             | 92.29%                                         | 75.64%                                                                      | 98.82%                                                 | 85.51%                                                                          |
| GSNAP                  | 94.28%                | 3.67%              | 75.25%                                         | 43.56%                                                                      | 99.49%                                                 | 57.32%                                                                          |
| GSNAP ann              | 94.31%                | 3.66%              | 79.16%                                         | 46.14%                                                                      | 99.80%                                                 | 58.16%                                                                          |
| GSTRUCT                | 94.47%                | 3.64%              | 80.51%                                         | 37.28%                                                                      | 99.55%                                                 | 46.34%                                                                          |
| GSTRUCT ann            | 95.18%                | 2.93%              | 80.64%                                         | 41.23%                                                                      | 99.62%                                                 | 51.29%                                                                          |
| MapSplice              | 92.72%                | 1.90%              | 92.82%                                         | 46.45%                                                                      | 99.26%                                                 | 49.13%                                                                          |
| MapSplice ann          | 92.90%                | 1.88%              | 92.70%                                         | 46.31%                                                                      | 99.24%                                                 | 48.97%                                                                          |
| PALMapper              | 62.96%                | 33.82%             | 97.57%                                         | 70.30%                                                                      | 99.59%                                                 | 89.69%                                                                          |
| PALMapper ann          | 60.71%                | 36.28%             | 98.61%                                         | 71.06%                                                                      | 99.74%                                                 | 89.41%                                                                          |
| PALMapper cons         | 71.11%                | 13.66%             | 96.29%                                         | 59.52%                                                                      | 99.52%                                                 | 81.57%                                                                          |
| PALMapper cons ann     | 72.53%                | 21.79%             | 97.15%                                         | 55.24%                                                                      | 99.74%                                                 | 85.28%                                                                          |
| PASS                   | 89.59%                | 0.56%              | 28.98%                                         | 8.66%                                                                       | 96.35%                                                 | 33.04%                                                                          |
| PASS cons              | 87.10%                | 0.38%              | 29.79%                                         | 12.13%                                                                      | 96.81%                                                 | 43.88%                                                                          |
| ReadsMap               | 82.51%                | 3.97%              | 84.58%                                         | 27.13%                                                                      | 86.71%                                                 | 27.99%                                                                          |
| SMALT                  | 96.07%                | 0.26%              | 67.19%                                         | 0.00%                                                                       | 97.76%                                                 | 73.00%                                                                          |
| STAR 1-pass            | 93.36%                | 2.87%              | 77.71%                                         | 40.46%                                                                      | 99.32%                                                 | 52.22%                                                                          |
| STAR 1-pass ann        | 93.33%                | 3.38%              | 82.00%                                         | 46.36%                                                                      | 99.61%                                                 | 62.46%                                                                          |
| STAR 2-pass            | 93.24%                | 3.53%              | 82.37%                                         | 49.17%                                                                      | 99.57%                                                 | 65.70%                                                                          |
| STAR 2-pass ann        | 93.08%                | 3.69%              | 82.56%                                         | 49.36%                                                                      | 99.61%                                                 | 65.88%                                                                          |
| TopHat1                | 83.98%                | 2.11%              | 96.38%                                         | 39.08%                                                                      | 98.72%                                                 | 43.37%                                                                          |
| TopHat1 ann            | 84.40%                | 2.13%              | 96.36%                                         | 39.47%                                                                      | 98.73%                                                 | 44.02%                                                                          |
| TopHat2                | 75.53%                | 2.39%              | 98.39%                                         | 40.69%                                                                      | 99.47%                                                 | 43.87%                                                                          |
| TopHat2 ann            | 77.05%                | 2.60%              | 98.56%                                         | 45.98%                                                                      | 99.58%                                                 | 52.60%                                                                          |

Results are shown for simulated reads from the nuclear genome. The percentages in the first two columns are relative to the total number of such reads, whereas the values in subsequent columns are relative to the number of unique or ambiguous mappings (or mapped bases) from each protocol.

**Supplementary Table 5.** Mapping accuracy for simulated data (all reads).

|                        | Uniquely mapped reads |                        |                             |                                    |                        |                          | All reads (primary alignment counted) |                        |                             |                                    |                        |                          |
|------------------------|-----------------------|------------------------|-----------------------------|------------------------------------|------------------------|--------------------------|---------------------------------------|------------------------|-----------------------------|------------------------------------|------------------------|--------------------------|
|                        | Mapped reads          | Perfectly mapped reads | Part correctly mapped reads | Reads mapped near correct location | Correctly mapped bases | Incorrectly mapped bases | Mapped reads                          | Perfectly mapped reads | Part correctly mapped reads | Reads mapped near correct location | Correctly mapped bases | Incorrectly mapped bases |
| <b>A. Simulation 1</b> |                       |                        |                             |                                    |                        |                          |                                       |                        |                             |                                    |                        |                          |
| BAGET ann              | 97.75%                | 85.04%                 | 7.63%                       | 0.02%                              | 90.41%                 | 5.18%                    | 98.49%                                | 85.04%                 | 8.24%                       | 0.02%                              | 90.61%                 | 5.23%                    |
| GEM ann                | 70.79%                | 68.66%                 | 1.98%                       | 0.00%                              | 70.45%                 | 0.31%                    | 99.90%                                | 93.38%                 | 3.53%                       | 0.01%                              | 96.54%                 | 3.29%                    |
| GEM cons               | 71.08%                | 68.84%                 | 2.09%                       | 0.00%                              | 70.71%                 | 0.33%                    | 99.87%                                | 93.28%                 | 3.61%                       | 0.01%                              | 96.49%                 | 3.30%                    |
| GEM cons ann           | 70.93%                | 68.76%                 | 2.01%                       | 0.00%                              | 70.57%                 | 0.31%                    | 99.89%                                | 93.35%                 | 3.56%                       | 0.01%                              | 96.53%                 | 3.29%                    |
| GSNAP                  | 95.65%                | 82.99%                 | 12.39%                      | 0.01%                              | 94.68%                 | 0.37%                    | 99.23%                                | 84.90%                 | 12.66%                      | 0.01%                              | 96.84%                 | 1.75%                    |
| GSNAP ann              | 95.72%                | 87.04%                 | 8.62%                       | 0.01%                              | 95.30%                 | 0.07%                    | 99.24%                                | 89.07%                 | 8.82%                       | 0.01%                              | 97.52%                 | 1.35%                    |
| GSTRUCT                | 95.70%                | 87.43%                 | 8.08%                       | 0.01%                              | 95.18%                 | 0.19%                    | 99.24%                                | 89.05%                 | 8.24%                       | 0.01%                              | 96.95%                 | 1.95%                    |
| GSTRUCT ann            | 96.59%                | 88.27%                 | 8.14%                       | 0.01%                              | 96.08%                 | 0.18%                    | 99.24%                                | 89.65%                 | 8.28%                       | 0.01%                              | 97.59%                 | 1.31%                    |
| MapSplice              | 96.70%                | 94.34%                 | 1.98%                       | 0.01%                              | 95.94%                 | 0.40%                    | 98.55%                                | 95.22%                 | 1.99%                       | 0.02%                              | 96.83%                 | 1.35%                    |
| MapSplice ann          | 96.79%                | 94.28%                 | 2.15%                       | 0.01%                              | 96.07%                 | 0.39%                    | 98.63%                                | 95.16%                 | 2.16%                       | 0.02%                              | 96.95%                 | 1.34%                    |
| PALMapper              | 68.50%                | 67.84%                 | 0.63%                       | 0.00%                              | 68.41%                 | 0.09%                    | 98.25%                                | 91.30%                 | 4.20%                       | 0.02%                              | 95.20%                 | 3.05%                    |
| PALMapper ann          | 67.57%                | 67.18%                 | 0.37%                       | 0.00%                              | 67.51%                 | 0.06%                    | 98.33%                                | 91.26%                 | 3.94%                       | 0.02%                              | 94.96%                 | 3.37%                    |
| PALMapper cons         | 73.43%                | 72.39%                 | 0.92%                       | 0.00%                              | 73.28%                 | 0.15%                    | 80.24%                                | 77.34%                 | 1.24%                       | 0.01%                              | 78.54%                 | 1.70%                    |
| PALMapper cons ann     | 77.83%                | 76.28%                 | 1.51%                       | 0.00%                              | 77.72%                 | 0.11%                    | 97.62%                                | 90.05%                 | 5.10%                       | 0.01%                              | 94.85%                 | 2.78%                    |
| PASS                   | 96.24%                | 48.11%                 | 45.10%                      | 0.02%                              | 90.62%                 | 3.08%                    | 96.85%                                | 48.21%                 | 45.21%                      | 0.02%                              | 90.83%                 | 3.46%                    |
| PASS cons              | 95.35%                | 48.08%                 | 44.60%                      | 0.02%                              | 90.27%                 | 2.75%                    | 95.83%                                | 48.18%                 | 44.71%                      | 0.02%                              | 90.47%                 | 3.01%                    |
| ReadsMap               | 83.60%                | 75.22%                 | 0.82%                       | 3.90%                              | 75.95%                 | 7.65%                    | 87.02%                                | 76.40%                 | 0.86%                       | 3.95%                              | 77.15%                 | 9.87%                    |
| SMALT                  | 96.72%                | 73.17%                 | 21.80%                      | 0.00%                              | 91.56%                 | 1.89%                    | 96.89%                                | 73.17%                 | 21.90%                      | 0.00%                              | 91.62%                 | 1.92%                    |
| STAR 1-pass            | 96.14%                | 84.61%                 | 11.20%                      | 0.00%                              | 94.87%                 | 0.47%                    | 98.72%                                | 85.81%                 | 11.35%                      | 0.01%                              | 96.20%                 | 1.70%                    |
| STAR 1-pass ann        | 95.56%                | 88.83%                 | 6.60%                       | 0.00%                              | 95.06%                 | 0.16%                    | 98.81%                                | 90.64%                 | 6.94%                       | 0.01%                              | 97.19%                 | 1.27%                    |
| STAR 2-pass            | 95.48%                | 89.11%                 | 6.24%                       | 0.00%                              | 95.01%                 | 0.16%                    | 98.82%                                | 91.05%                 | 6.57%                       | 0.01%                              | 97.26%                 | 1.23%                    |
| STAR 2-pass ann        | 95.29%                | 89.00%                 | 6.16%                       | 0.00%                              | 94.84%                 | 0.15%                    | 98.81%                                | 91.08%                 | 6.52%                       | 0.01%                              | 97.26%                 | 1.25%                    |
| TopHat1                | 93.37%                | 90.12%                 | 1.96%                       | 0.02%                              | 92.00%                 | 1.37%                    | 95.23%                                | 90.87%                 | 2.00%                       | 0.02%                              | 92.79%                 | 2.44%                    |
| TopHat1 ann            | 93.51%                | 90.21%                 | 2.00%                       | 0.02%                              | 92.13%                 | 1.37%                    | 95.39%                                | 90.97%                 | 2.05%                       | 0.02%                              | 92.94%                 | 2.45%                    |
| TopHat2                | 91.38%                | 90.41%                 | 0.46%                       | 0.01%                              | 90.84%                 | 0.54%                    | 93.81%                                | 91.45%                 | 0.56%                       | 0.02%                              | 91.96%                 | 1.85%                    |
| TopHat2 ann            | 92.00%                | 91.35%                 | 0.36%                       | 0.01%                              | 91.69%                 | 0.31%                    | 94.62%                                | 92.64%                 | 0.54%                       | 0.02%                              | 93.16%                 | 1.46%                    |
| <b>B. Simulation 2</b> |                       |                        |                             |                                    |                        |                          |                                       |                        |                             |                                    |                        |                          |
| BAGET ann              | 94.93%                | 80.35%                 | 9.77%                       | 0.01%                              | 86.98%                 | 4.73%                    | 96.77%                                | 80.35%                 | 11.31%                      | 0.01%                              | 87.49%                 | 4.83%                    |
| GEM ann                | 71.85%                | 66.36%                 | 5.21%                       | 0.01%                              | 70.84%                 | 0.84%                    | 99.40%                                | 87.23%                 | 8.29%                       | 0.02%                              | 94.33%                 | 4.76%                    |
| GEM cons               | 72.50%                | 66.77%                 | 5.45%                       | 0.01%                              | 71.44%                 | 0.88%                    | 99.36%                                | 87.06%                 | 8.40%                       | 0.02%                              | 94.25%                 | 4.80%                    |
| GEM cons ann           | 72.21%                | 66.64%                 | 5.28%                       | 0.01%                              | 71.19%                 | 0.85%                    | 99.39%                                | 87.21%                 | 8.30%                       | 0.02%                              | 94.32%                 | 4.77%                    |
| GSNAP                  | 94.28%                | 70.94%                 | 22.95%                      | 0.01%                              | 92.48%                 | 0.47%                    | 97.95%                                | 72.54%                 | 23.45%                      | 0.01%                              | 94.55%                 | 2.01%                    |
| GSNAP ann              | 94.31%                | 74.66%                 | 19.48%                      | 0.01%                              | 93.18%                 | 0.19%                    | 97.97%                                | 76.35%                 | 19.91%                      | 0.01%                              | 95.27%                 | 1.70%                    |
| GSTRUCT                | 94.47%                | 76.06%                 | 18.01%                      | 0.01%                              | 93.18%                 | 0.42%                    | 98.11%                                | 77.42%                 | 18.33%                      | 0.01%                              | 94.85%                 | 2.34%                    |
| GSTRUCT ann            | 95.18%                | 76.75%                 | 18.08%                      | 0.01%                              | 93.95%                 | 0.36%                    | 98.11%                                | 77.96%                 | 18.37%                      | 0.01%                              | 95.43%                 | 1.76%                    |
| MapSplice              | 92.72%                | 86.05%                 | 6.00%                       | 0.01%                              | 90.55%                 | 0.68%                    | 94.61%                                | 86.94%                 | 6.05%                       | 0.02%                              | 91.46%                 | 1.62%                    |
| MapSplice ann          | 92.90%                | 86.13%                 | 6.11%                       | 0.01%                              | 90.77%                 | 0.70%                    | 94.78%                                | 87.00%                 | 6.16%                       | 0.01%                              | 91.67%                 | 1.64%                    |
| PALMapper              | 62.96%                | 61.43%                 | 1.43%                       | 0.00%                              | 62.70%                 | 0.26%                    | 96.78%                                | 85.21%                 | 8.47%                       | 0.02%                              | 93.03%                 | 3.74%                    |
| PALMapper ann          | 60.71%                | 59.87%                 | 0.77%                       | 0.00%                              | 60.55%                 | 0.16%                    | 96.99%                                | 85.65%                 | 7.83%                       | 0.02%                              | 92.99%                 | 4.00%                    |
| PALMapper cons         | 71.11%                | 68.47%                 | 2.41%                       | 0.00%                              | 70.77%                 | 0.34%                    | 84.76%                                | 76.60%                 | 5.55%                       | 0.02%                              | 81.91%                 | 2.86%                    |
| PALMapper cons ann     | 72.53%                | 70.46%                 | 1.96%                       | 0.00%                              | 72.34%                 | 0.19%                    | 94.32%                                | 82.50%                 | 8.88%                       | 0.02%                              | 90.92%                 | 3.40%                    |
| PASS                   | 89.59%                | 25.96%                 | 60.51%                      | 0.02%                              | 80.35%                 | 3.04%                    | 90.15%                                | 26.01%                 | 60.64%                      | 0.02%                              | 80.52%                 | 3.38%                    |
| PASS cons              | 87.10%                | 25.94%                 | 58.58%                      | 0.02%                              | 79.12%                 | 2.60%                    | 87.48%                                | 25.99%                 | 58.71%                      | 0.02%                              | 79.28%                 | 2.80%                    |
| ReadsMap               | 82.51%                | 69.79%                 | 2.02%                       | 7.49%                              | 71.54%                 | 10.97%                   | 86.48%                                | 70.87%                 | 2.06%                       | 7.59%                              | 72.65%                 | 13.83%                   |
| SMALT                  | 96.07%                | 64.55%                 | 29.38%                      | 0.00%                              | 90.04%                 | 2.07%                    | 96.34%                                | 64.55%                 | 29.55%                      | 0.00%                              | 90.13%                 | 2.10%                    |
| STAR 1-pass            | 93.36%                | 72.55%                 | 20.39%                      | 0.00%                              | 90.75%                 | 0.62%                    | 96.23%                                | 73.72%                 | 20.74%                      | 0.01%                              | 92.21%                 | 1.96%                    |
| STAR 1-pass ann        | 93.33%                | 76.53%                 | 16.55%                      | 0.00%                              | 91.66%                 | 0.36%                    | 96.71%                                | 78.10%                 | 17.11%                      | 0.01%                              | 93.73%                 | 1.60%                    |
| STAR 2-pass            | 93.24%                | 76.80%                 | 16.14%                      | 0.00%                              | 91.58%                 | 0.39%                    | 96.77%                                | 78.54%                 | 16.74%                      | 0.01%                              | 93.85%                 | 1.58%                    |
| STAR 2-pass ann        | 93.08%                | 76.85%                 | 15.98%                      | 0.00%                              | 91.51%                 | 0.35%                    | 96.77%                                | 78.67%                 | 16.61%                      | 0.01%                              | 93.90%                 | 1.59%                    |
| TopHat1                | 83.98%                | 80.94%                 | 2.04%                       | 0.01%                              | 82.90%                 | 1.08%                    | 86.09%                                | 81.76%                 | 2.14%                       | 0.01%                              | 83.82%                 | 2.27%                    |
| TopHat1 ann            | 84.40%                | 81.32%                 | 2.08%                       | 0.01%                              | 83.32%                 | 1.07%                    | 86.53%                                | 82.16%                 | 2.19%                       | 0.01%                              | 84.26%                 | 2.27%                    |
| TopHat2                | 75.53%                | 74.31%                 | 0.87%                       | 0.01%                              | 75.13%                 | 0.40%                    | 77.92%                                | 75.29%                 | 0.97%                       | 0.01%                              | 76.18%                 | 1.74%                    |
| TopHat2 ann            | 77.05%                | 75.94%                 | 0.83%                       | 0.01%                              | 76.73%                 | 0.32%                    | 79.65%                                | 77.14%                 | 1.02%                       | 0.01%                              | 78.10%                 | 1.55%                    |

Results are shown for simulated reads from the nuclear genome, and percentages are relative to the total number of such reads. Perfectly mapped reads have all 76 bases correctly placed (accounting for ambiguity in indel placement as described in Methods). Part correctly mapped reads have at least one base correctly placed, but not all 76. Reads mapped near the correct location are those for which no base is correctly placed, but the mapping overlaps with the correct mapping (this may occur in repetitive regions or indicate a bug in the aligner, as for ReadsMap).

**Supplementary Table 6.** Mapping accuracy for simulated data (spliced reads).

|                        | Uniquely mapped reads |                        |                             |                                    |                        |                          | All reads (primary alignment counted) |                        |                             |                                    |                        |                          |
|------------------------|-----------------------|------------------------|-----------------------------|------------------------------------|------------------------|--------------------------|---------------------------------------|------------------------|-----------------------------|------------------------------------|------------------------|--------------------------|
|                        | Mapped reads          | Perfectly mapped reads | Part correctly mapped reads | Reads mapped near correct location | Correctly mapped bases | Incorrectly mapped bases | Mapped reads                          | Perfectly mapped reads | Part correctly mapped reads | Reads mapped near correct location | Correctly mapped bases | Incorrectly mapped bases |
| <b>A. Simulation 1</b> |                       |                        |                             |                                    |                        |                          |                                       |                        |                             |                                    |                        |                          |
| BAGET ann              | 91.73%                | 39.23%                 | 35.43%                      | 0.01%                              | 64.14%                 | 17.83%                   | 94.59%                                | 39.23%                 | 37.95%                      | 0.01%                              | 64.96%                 | 17.96%                   |
| GEM ann                | 21.58%                | 13.33%                 | 7.71%                       | 0.01%                              | 20.19%                 | 1.25%                    | 99.52%                                | 80.46%                 | 14.78%                      | 0.01%                              | 93.57%                 | 5.64%                    |
| GEM cons               | 22.39%                | 13.58%                 | 8.23%                       | 0.01%                              | 20.84%                 | 1.37%                    | 99.38%                                | 79.94%                 | 15.16%                      | 0.01%                              | 93.31%                 | 5.72%                    |
| GEM cons ann           | 21.93%                | 13.54%                 | 7.84%                       | 0.01%                              | 20.50%                 | 1.27%                    | 99.49%                                | 80.30%                 | 14.91%                      | 0.01%                              | 93.50%                 | 5.67%                    |
| GSNAP                  | 96.44%                | 64.51%                 | 31.00%                      | 0.00%                              | 93.21%                 | 1.44%                    | 99.31%                                | 65.51%                 | 31.61%                      | 0.00%                              | 94.78%                 | 2.68%                    |
| GSNAP ann              | 96.82%                | 85.14%                 | 11.58%                      | 0.00%                              | 96.20%                 | 0.18%                    | 99.36%                                | 86.57%                 | 11.81%                      | 0.00%                              | 97.84%                 | 1.07%                    |
| GSTRUCT                | 95.09%                | 84.77%                 | 10.13%                      | 0.00%                              | 94.45%                 | 0.26%                    | 99.38%                                | 86.57%                 | 10.35%                      | 0.00%                              | 96.46%                 | 2.52%                    |
| GSTRUCT ann            | 97.33%                | 86.94%                 | 10.23%                      | 0.00%                              | 96.73%                 | 0.23%                    | 99.37%                                | 87.93%                 | 10.39%                      | 0.00%                              | 97.88%                 | 1.11%                    |
| MapSplice              | 97.09%                | 89.22%                 | 7.01%                       | 0.00%                              | 95.09%                 | 0.96%                    | 97.46%                                | 89.27%                 | 7.04%                       | 0.00%                              | 95.17%                 | 1.24%                    |
| MapSplice ann          | 97.51%                | 88.89%                 | 7.82%                       | 0.00%                              | 95.69%                 | 0.93%                    | 97.86%                                | 88.91%                 | 7.86%                       | 0.00%                              | 95.75%                 | 1.21%                    |
| PALMapper              | 35.11%                | 32.21%                 | 2.85%                       | 0.00%                              | 34.77%                 | 0.33%                    | 98.58%                                | 81.36%                 | 14.58%                      | 0.00%                              | 94.77%                 | 3.81%                    |
| PALMapper ann          | 33.21%                | 31.60%                 | 1.59%                       | 0.00%                              | 33.05%                 | 0.16%                    | 98.95%                                | 83.57%                 | 12.49%                      | 0.00%                              | 95.22%                 | 3.74%                    |
| PALMapper cons         | 41.10%                | 35.99%                 | 4.56%                       | 0.00%                              | 40.42%                 | 0.68%                    | 52.14%                                | 44.62%                 | 5.54%                       | 0.00%                              | 49.96%                 | 2.18%                    |
| PALMapper cons ann     | 63.26%                | 55.90%                 | 7.30%                       | 0.00%                              | 62.88%                 | 0.39%                    | 97.29%                                | 75.16%                 | 19.30%                      | 0.00%                              | 93.27%                 | 4.02%                    |
| PASS                   | 92.26%                | 56.31%                 | 29.43%                      | 0.01%                              | 82.78%                 | 7.01%                    | 92.44%                                | 56.35%                 | 29.50%                      | 0.01%                              | 82.86%                 | 7.09%                    |
| PASS cons              | 91.61%                | 56.31%                 | 29.01%                      | 0.01%                              | 82.52%                 | 6.81%                    | 91.75%                                | 56.34%                 | 29.07%                      | 0.01%                              | 82.59%                 | 6.87%                    |
| ReadsMap               | 94.52%                | 87.94%                 | 2.26%                       | 4.19%                              | 89.99%                 | 4.53%                    | 97.44%                                | 89.05%                 | 2.32%                       | 4.24%                              | 91.14%                 | 6.29%                    |
| SMALT                  | 96.10%                | 5.52%                  | 83.88%                      | 0.00%                              | 72.96%                 | 8.06%                    | 96.65%                                | 5.52%                  | 84.39%                      | 0.00%                              | 73.27%                 | 8.09%                    |
| STAR 1-pass            | 96.68%                | 59.73%                 | 35.86%                      | 0.00%                              | 91.57%                 | 1.79%                    | 98.81%                                | 60.31%                 | 36.32%                      | 0.00%                              | 92.53%                 | 2.88%                    |
| STAR 1-pass ann        | 94.73%                | 82.28%                 | 12.26%                      | 0.00%                              | 93.43%                 | 0.35%                    | 99.14%                                | 84.77%                 | 13.53%                      | 0.00%                              | 97.11%                 | 1.03%                    |
| STAR 2-pass            | 94.46%                | 83.70%                 | 10.47%                      | 0.00%                              | 93.22%                 | 0.41%                    | 99.18%                                | 86.72%                 | 11.66%                      | 0.00%                              | 97.34%                 | 0.95%                    |
| STAR 2-pass ann        | 93.82%                | 83.73%                 | 9.90%                       | 0.00%                              | 92.80%                 | 0.29%                    | 99.16%                                | 87.13%                 | 11.23%                      | 0.00%                              | 97.46%                 | 0.93%                    |
| TopHat1                | 91.77%                | 78.88%                 | 9.43%                       | 0.00%                              | 87.93%                 | 3.84%                    | 93.03%                                | 79.29%                 | 9.64%                       | 0.00%                              | 88.53%                 | 4.50%                    |
| TopHat1 ann            | 92.48%                | 79.36%                 | 9.66%                       | 0.00%                              | 88.63%                 | 3.85%                    | 93.81%                                | 79.82%                 | 9.89%                       | 0.00%                              | 89.30%                 | 4.51%                    |
| TopHat2                | 88.01%                | 84.78%                 | 1.78%                       | 0.00%                              | 86.42%                 | 1.59%                    | 90.02%                                | 85.57%                 | 2.23%                       | 0.00%                              | 87.56%                 | 2.46%                    |
| TopHat2 ann            | 91.24%                | 90.04%                 | 1.08%                       | 0.00%                              | 91.06%                 | 0.18%                    | 94.51%                                | 91.82%                 | 1.75%                       | 0.00%                              | 93.47%                 | 1.04%                    |
| <b>B. Simulation 2</b> |                       |                        |                             |                                    |                        |                          |                                       |                        |                             |                                    |                        |                          |
| BAGET ann              | 85.25%                | 36.99%                 | 33.78%                      | 0.01%                              | 59.31%                 | 14.73%                   | 90.25%                                | 36.99%                 | 38.15%                      | 0.01%                              | 60.74%                 | 14.96%                   |
| GEM ann                | 27.43%                | 12.78%                 | 13.67%                      | 0.03%                              | 23.77%                 | 2.95%                    | 97.25%                                | 66.53%                 | 25.21%                      | 0.05%                              | 87.09%                 | 8.79%                    |
| GEM cons               | 28.68%                | 13.04%                 | 14.63%                      | 0.04%                              | 24.78%                 | 3.14%                    | 97.02%                                | 65.67%                 | 25.79%                      | 0.05%                              | 86.66%                 | 8.98%                    |
| GEM cons ann           | 27.85%                | 13.00%                 | 13.87%                      | 0.03%                              | 24.14%                 | 2.99%                    | 97.20%                                | 66.39%                 | 25.29%                      | 0.05%                              | 87.02%                 | 8.82%                    |
| GSNAP                  | 94.22%                | 51.61%                 | 41.43%                      | 0.00%                              | 89.48%                 | 1.66%                    | 97.36%                                | 52.53%                 | 42.26%                      | 0.00%                              | 91.15%                 | 3.02%                    |
| GSNAP ann              | 94.43%                | 70.60%                 | 23.51%                      | 0.00%                              | 92.82%                 | 0.44%                    | 97.45%                                | 71.93%                 | 23.97%                      | 0.00%                              | 94.59%                 | 1.65%                    |
| GSTRUCT                | 93.53%                | 72.18%                 | 20.61%                      | 0.00%                              | 91.67%                 | 0.85%                    | 97.73%                                | 73.62%                 | 21.03%                      | 0.00%                              | 93.50%                 | 3.16%                    |
| GSTRUCT ann            | 95.04%                | 73.83%                 | 20.68%                      | 0.00%                              | 93.40%                 | 0.63%                    | 97.72%                                | 74.86%                 | 21.01%                      | 0.00%                              | 94.74%                 | 1.93%                    |
| MapSplice              | 88.03%                | 71.09%                 | 15.41%                      | 0.00%                              | 82.84%                 | 1.63%                    | 88.44%                                | 71.12%                 | 15.51%                      | 0.00%                              | 82.95%                 | 1.88%                    |
| MapSplice ann          | 88.97%                | 71.60%                 | 15.83%                      | 0.00%                              | 84.03%                 | 1.69%                    | 89.35%                                | 71.61%                 | 15.93%                      | 0.00%                              | 84.12%                 | 1.93%                    |
| PALMapper              | 30.30%                | 24.79%                 | 5.36%                       | 0.00%                              | 29.51%                 | 0.79%                    | 95.42%                                | 69.75%                 | 22.73%                      | 0.00%                              | 90.24%                 | 5.18%                    |
| PALMapper ann          | 26.37%                | 23.94%                 | 2.37%                       | 0.00%                              | 26.05%                 | 0.32%                    | 96.47%                                | 75.00%                 | 18.43%                      | 0.00%                              | 92.08%                 | 4.39%                    |
| PALMapper cons         | 41.40%                | 30.85%                 | 9.70%                       | 0.00%                              | 40.07%                 | 1.34%                    | 59.63%                                | 40.60%                 | 15.50%                      | 0.00%                              | 55.29%                 | 4.34%                    |
| PALMapper cons ann     | 58.04%                | 50.08%                 | 7.82%                       | 0.00%                              | 57.55%                 | 0.49%                    | 91.45%                                | 65.20%                 | 23.19%                      | 0.00%                              | 86.99%                 | 4.47%                    |
| PASS                   | 78.31%                | 31.92%                 | 40.48%                      | 0.02%                              | 66.53%                 | 6.17%                    | 78.50%                                | 31.94%                 | 40.57%                      | 0.02%                              | 66.61%                 | 6.25%                    |
| PASS cons              | 75.77%                | 31.92%                 | 38.45%                      | 0.02%                              | 65.27%                 | 5.76%                    | 75.90%                                | 31.94%                 | 38.52%                      | 0.02%                              | 65.34%                 | 5.81%                    |
| ReadsMap               | 87.63%                | 72.81%                 | 4.81%                       | 9.70%                              | 77.02%                 | 10.61%                   | 90.82%                                | 73.88%                 | 4.93%                       | 9.82%                              | 78.17%                 | 12.65%                   |
| SMALT                  | 94.88%                | 4.13%                  | 83.91%                      | 0.00%                              | 70.66%                 | 7.84%                    | 95.85%                                | 4.13%                  | 84.75%                      | 0.00%                              | 71.16%                 | 7.91%                    |
| STAR 1-pass            | 91.80%                | 42.50%                 | 48.05%                      | 0.00%                              | 82.96%                 | 2.14%                    | 94.50%                                | 43.11%                 | 48.93%                      | 0.00%                              | 84.26%                 | 3.30%                    |
| STAR 1-pass ann        | 91.98%                | 63.42%                 | 28.13%                      | 0.00%                              | 87.96%                 | 0.80%                    | 96.47%                                | 65.30%                 | 29.87%                      | 0.00%                              | 91.37%                 | 1.69%                    |
| STAR 2-pass            | 91.89%                | 65.27%                 | 25.99%                      | 0.00%                              | 87.96%                 | 0.95%                    | 96.70%                                | 67.61%                 | 27.80%                      | 0.00%                              | 91.90%                 | 1.62%                    |
| STAR 2-pass ann        | 91.34%                | 65.81%                 | 25.10%                      | 0.00%                              | 87.89%                 | 0.73%                    | 96.71%                                | 68.46%                 | 26.98%                      | 0.00%                              | 92.22%                 | 1.59%                    |
| TopHat1                | 77.46%                | 66.62%                 | 8.04%                       | 0.00%                              | 74.35%                 | 3.11%                    | 79.17%                                | 67.23%                 | 8.38%                       | 0.00%                              | 75.26%                 | 3.91%                    |
| TopHat1 ann            | 79.59%                | 68.59%                 | 8.23%                       | 0.00%                              | 76.49%                 | 3.10%                    | 81.39%                                | 69.26%                 | 8.60%                       | 0.00%                              | 77.50%                 | 3.90%                    |
| TopHat2                | 65.76%                | 62.38%                 | 2.35%                       | 0.00%                              | 64.57%                 | 1.19%                    | 67.56%                                | 63.07%                 | 2.73%                       | 0.00%                              | 65.54%                 | 2.02%                    |
| TopHat2 ann            | 73.10%                | 70.93%                 | 1.99%                       | 0.00%                              | 72.81%                 | 0.29%                    | 76.50%                                | 72.68%                 | 2.67%                       | 0.00%                              | 75.18%                 | 1.32%                    |

Results are shown for simulated spliced reads from the nuclear genome, and percentages are relative to the total number of such reads. Perfectly mapped reads have all 76 bases correctly placed (accounting for ambiguity in indel placement as described in Methods). Part correctly mapped reads have at least one base correctly placed, but not all 76. Reads mapped near the correct location are those for which no base is correctly placed, but the mapping overlaps with the correct mapping (this may occur in repetitive regions or indicate a bug in the aligner, as for ReadsMap).

**Supplementary Table 7.** Mapping accuracy for simulated data (unspliced reads).

|                        | Uniquely mapped reads |                        |                             |                                    |                        |                          | All reads (primary alignment counted) |                        |                             |                                    |                        |                          |
|------------------------|-----------------------|------------------------|-----------------------------|------------------------------------|------------------------|--------------------------|---------------------------------------|------------------------|-----------------------------|------------------------------------|------------------------|--------------------------|
|                        | Mapped reads          | Perfectly mapped reads | Part correctly mapped reads | Reads mapped near correct location | Correctly mapped bases | Incorrectly mapped bases | Mapped reads                          | Perfectly mapped reads | Part correctly mapped reads | Reads mapped near correct location | Correctly mapped bases | Incorrectly mapped bases |
| <b>A. Simulation 1</b> |                       |                        |                             |                                    |                        |                          |                                       |                        |                             |                                    |                        |                          |
| BAGET ann              | 99.22%                | 96.23%                 | 0.84%                       | 0.02%                              | 96.83%                 | 2.09%                    | 99.45%                                | 96.23%                 | 0.98%                       | 0.02%                              | 96.88%                 | 2.11%                    |
| GEM ann                | 82.81%                | 82.18%                 | 0.58%                       | 0.00%                              | 82.73%                 | 0.08%                    | 99.99%                                | 96.53%                 | 0.79%                       | 0.02%                              | 97.27%                 | 2.71%                    |
| GEM cons               | 82.98%                | 82.34%                 | 0.59%                       | 0.00%                              | 82.89%                 | 0.08%                    | 99.99%                                | 96.53%                 | 0.78%                       | 0.02%                              | 97.27%                 | 2.71%                    |
| GEM cons ann           | 82.90%                | 82.26%                 | 0.59%                       | 0.00%                              | 82.81%                 | 0.08%                    | 99.99%                                | 96.53%                 | 0.78%                       | 0.02%                              | 97.27%                 | 2.71%                    |
| GSNAP                  | 95.46%                | 87.50%                 | 7.85%                       | 0.01%                              | 95.03%                 | 0.11%                    | 99.21%                                | 89.64%                 | 8.03%                       | 0.02%                              | 97.35%                 | 1.52%                    |
| GSNAP ann              | 95.45%                | 87.51%                 | 7.89%                       | 0.01%                              | 95.08%                 | 0.05%                    | 99.21%                                | 89.68%                 | 8.09%                       | 0.02%                              | 97.44%                 | 1.42%                    |
| GSTRUCT                | 95.84%                | 88.08%                 | 7.59%                       | 0.01%                              | 95.36%                 | 0.17%                    | 99.21%                                | 89.66%                 | 7.72%                       | 0.02%                              | 97.07%                 | 1.81%                    |
| GSTRUCT ann            | 96.40%                | 88.60%                 | 7.63%                       | 0.01%                              | 95.92%                 | 0.17%                    | 99.21%                                | 90.07%                 | 7.76%                       | 0.02%                              | 97.52%                 | 1.36%                    |
| MapSplice              | 96.61%                | 95.60%                 | 0.75%                       | 0.01%                              | 96.15%                 | 0.26%                    | 98.82%                                | 96.68%                 | 0.75%                       | 0.02%                              | 97.24%                 | 1.38%                    |
| MapSplice ann          | 96.61%                | 95.60%                 | 0.76%                       | 0.01%                              | 96.16%                 | 0.25%                    | 98.82%                                | 96.68%                 | 0.77%                       | 0.02%                              | 97.25%                 | 1.37%                    |
| PALMapper              | 76.66%                | 76.55%                 | 0.09%                       | 0.00%                              | 76.62%                 | 0.04%                    | 98.17%                                | 93.73%                 | 1.66%                       | 0.03%                              | 95.31%                 | 2.87%                    |
| PALMapper ann          | 75.97%                | 75.87%                 | 0.07%                       | 0.00%                              | 75.93%                 | 0.04%                    | 98.17%                                | 93.14%                 | 1.85%                       | 0.03%                              | 94.89%                 | 3.28%                    |
| PALMapper cons         | 81.33%                | 81.28%                 | 0.03%                       | 0.00%                              | 81.31%                 | 0.02%                    | 87.11%                                | 85.34%                 | 0.19%                       | 0.01%                              | 85.52%                 | 1.59%                    |
| PALMapper cons ann     | 81.39%                | 81.26%                 | 0.09%                       | 0.00%                              | 81.35%                 | 0.04%                    | 97.71%                                | 93.69%                 | 1.62%                       | 0.02%                              | 95.23%                 | 2.47%                    |
| PASS                   | 97.21%                | 46.10%                 | 48.92%                      | 0.02%                              | 92.53%                 | 2.12%                    | 97.93%                                | 46.23%                 | 49.05%                      | 0.02%                              | 92.78%                 | 2.57%                    |
| PASS cons              | 96.26%                | 46.06%                 | 48.41%                      | 0.02%                              | 92.16%                 | 1.76%                    | 96.82%                                | 46.18%                 | 48.54%                      | 0.02%                              | 92.40%                 | 2.07%                    |
| ReadsMap               | 80.93%                | 72.11%                 | 0.47%                       | 3.83%                              | 72.52%                 | 8.41%                    | 84.47%                                | 73.31%                 | 0.50%                       | 3.88%                              | 73.73%                 | 10.74%                   |
| SMALT                  | 96.87%                | 89.70%                 | 6.63%                       | 0.00%                              | 96.11%                 | 0.38%                    | 96.95%                                | 89.70%                 | 6.63%                       | 0.00%                              | 96.11%                 | 0.41%                    |
| STAR 1-pass            | 96.01%                | 90.69%                 | 5.17%                       | 0.00%                              | 95.68%                 | 0.15%                    | 98.70%                                | 92.04%                 | 5.25%                       | 0.01%                              | 97.10%                 | 1.41%                    |
| STAR 1-pass ann        | 95.76%                | 90.43%                 | 5.22%                       | 0.00%                              | 95.46%                 | 0.12%                    | 98.73%                                | 92.08%                 | 5.33%                       | 0.01%                              | 97.21%                 | 1.32%                    |
| STAR 2-pass            | 95.73%                | 90.42%                 | 5.21%                       | 0.00%                              | 95.45%                 | 0.10%                    | 98.73%                                | 92.11%                 | 5.33%                       | 0.01%                              | 97.24%                 | 1.30%                    |
| STAR 2-pass ann        | 95.65%                | 90.29%                 | 5.24%                       | 0.00%                              | 95.34%                 | 0.12%                    | 98.73%                                | 92.04%                 | 5.37%                       | 0.01%                              | 97.21%                 | 1.33%                    |
| TopHat1                | 93.76%                | 92.87%                 | 0.13%                       | 0.02%                              | 93.00%                 | 0.77%                    | 95.77%                                | 93.70%                 | 0.14%                       | 0.02%                              | 93.83%                 | 1.94%                    |
| TopHat1 ann            | 93.76%                | 92.86%                 | 0.13%                       | 0.02%                              | 92.99%                 | 0.77%                    | 95.77%                                | 93.70%                 | 0.14%                       | 0.02%                              | 93.83%                 | 1.94%                    |
| TopHat2                | 92.20%                | 91.78%                 | 0.14%                       | 0.01%                              | 91.92%                 | 0.29%                    | 94.73%                                | 92.89%                 | 0.15%                       | 0.02%                              | 93.03%                 | 1.70%                    |
| TopHat2 ann            | 92.19%                | 91.67%                 | 0.19%                       | 0.01%                              | 91.85%                 | 0.34%                    | 94.65%                                | 92.85%                 | 0.25%                       | 0.02%                              | 93.08%                 | 1.57%                    |
| <b>B. Simulation 2</b> |                       |                        |                             |                                    |                        |                          |                                       |                        |                             |                                    |                        |                          |
| BAGET ann              | 97.27%                | 90.86%                 | 3.94%                       | 0.01%                              | 93.68%                 | 2.31%                    | 98.35%                                | 90.86%                 | 4.81%                       | 0.01%                              | 93.97%                 | 2.38%                    |
| GEM ann                | 82.62%                | 79.35%                 | 3.16%                       | 0.00%                              | 82.25%                 | 0.33%                    | 99.92%                                | 92.25%                 | 4.19%                       | 0.02%                              | 96.09%                 | 3.78%                    |
| GEM cons               | 83.12%                | 79.79%                 | 3.22%                       | 0.00%                              | 82.75%                 | 0.33%                    | 99.92%                                | 92.25%                 | 4.18%                       | 0.02%                              | 96.08%                 | 3.79%                    |
| GEM cons ann           | 82.96%                | 79.65%                 | 3.20%                       | 0.00%                              | 82.59%                 | 0.33%                    | 99.92%                                | 92.25%                 | 4.18%                       | 0.02%                              | 96.09%                 | 3.78%                    |
| GSNAP                  | 94.29%                | 75.62%                 | 18.47%                      | 0.01%                              | 93.21%                 | 0.18%                    | 98.10%                                | 77.39%                 | 18.89%                      | 0.02%                              | 95.38%                 | 1.77%                    |
| GSNAP ann              | 94.29%                | 75.64%                 | 18.51%                      | 0.01%                              | 93.26%                 | 0.13%                    | 98.10%                                | 77.42%                 | 18.93%                      | 0.02%                              | 95.44%                 | 1.71%                    |
| GSTRUCT                | 94.70%                | 77.00%                 | 17.38%                      | 0.01%                              | 93.55%                 | 0.31%                    | 98.20%                                | 78.34%                 | 17.68%                      | 0.02%                              | 95.17%                 | 2.14%                    |
| GSTRUCT ann            | 95.21%                | 77.46%                 | 17.46%                      | 0.01%                              | 94.08%                 | 0.29%                    | 98.20%                                | 78.71%                 | 17.74%                      | 0.02%                              | 95.60%                 | 1.72%                    |
| MapSplice              | 93.85%                | 89.68%                 | 3.72%                       | 0.01%                              | 92.41%                 | 0.44%                    | 96.11%                                | 90.77%                 | 3.76%                       | 0.02%                              | 93.53%                 | 1.56%                    |
| MapSplice ann          | 93.86%                | 89.65%                 | 3.76%                       | 0.01%                              | 92.40%                 | 0.46%                    | 96.10%                                | 90.73%                 | 3.79%                       | 0.02%                              | 93.51%                 | 1.57%                    |
| PALMapper              | 70.87%                | 70.31%                 | 0.48%                       | 0.00%                              | 70.75%                 | 0.13%                    | 97.11%                                | 88.95%                 | 5.02%                       | 0.02%                              | 93.71%                 | 3.40%                    |
| PALMapper ann          | 69.03%                | 68.58%                 | 0.38%                       | 0.00%                              | 68.91%                 | 0.12%                    | 97.12%                                | 88.23%                 | 5.27%                       | 0.03%                              | 93.21%                 | 3.91%                    |
| PALMapper cons         | 78.31%                | 77.59%                 | 0.64%                       | 0.00%                              | 78.21%                 | 0.10%                    | 90.86%                                | 85.32%                 | 3.13%                       | 0.02%                              | 88.36%                 | 2.50%                    |
| PALMapper cons ann     | 76.04%                | 75.40%                 | 0.55%                       | 0.00%                              | 75.92%                 | 0.12%                    | 95.01%                                | 86.69%                 | 5.41%                       | 0.02%                              | 91.87%                 | 3.14%                    |
| PASS                   | 92.32%                | 24.52%                 | 65.36%                      | 0.02%                              | 83.71%                 | 2.29%                    | 92.97%                                | 24.58%                 | 65.51%                      | 0.02%                              | 83.89%                 | 2.69%                    |
| PASS cons              | 89.84%                | 24.50%                 | 63.46%                      | 0.02%                              | 82.47%                 | 1.84%                    | 90.29%                                | 24.55%                 | 63.60%                      | 0.02%                              | 82.65%                 | 2.08%                    |
| ReadsMap               | 81.27%                | 69.06%                 | 1.35%                       | 6.95%                              | 70.22%                 | 11.06%                   | 85.43%                                | 70.14%                 | 1.37%                       | 7.05%                              | 71.32%                 | 14.11%                   |
| SMALT                  | 96.36%                | 79.19%                 | 16.17%                      | 0.00%                              | 94.73%                 | 0.67%                    | 96.45%                                | 79.19%                 | 16.17%                      | 0.00%                              | 94.73%                 | 0.69%                    |
| STAR 1-pass            | 93.74%                | 79.84%                 | 13.68%                      | 0.00%                              | 92.64%                 | 0.26%                    | 96.65%                                | 81.13%                 | 13.90%                      | 0.01%                              | 94.14%                 | 1.64%                    |
| STAR 1-pass ann        | 93.66%                | 79.71%                 | 13.74%                      | 0.00%                              | 92.55%                 | 0.25%                    | 96.77%                                | 81.20%                 | 14.02%                      | 0.01%                              | 94.30%                 | 1.58%                    |
| STAR 2-pass            | 93.56%                | 79.59%                 | 13.76%                      | 0.00%                              | 92.45%                 | 0.26%                    | 96.79%                                | 81.18%                 | 14.07%                      | 0.01%                              | 94.33%                 | 1.57%                    |
| STAR 2-pass ann        | 93.51%                | 79.52%                 | 13.77%                      | 0.00%                              | 92.39%                 | 0.26%                    | 96.79%                                | 81.14%                 | 14.09%                      | 0.01%                              | 94.31%                 | 1.59%                    |
| TopHat1                | 85.55%                | 84.41%                 | 0.59%                       | 0.02%                              | 84.97%                 | 0.58%                    | 87.77%                                | 85.29%                 | 0.63%                       | 0.02%                              | 85.89%                 | 1.88%                    |
| TopHat1 ann            | 85.56%                | 84.41%                 | 0.59%                       | 0.02%                              | 84.98%                 | 0.58%                    | 87.78%                                | 85.29%                 | 0.63%                       | 0.02%                              | 85.90%                 | 1.87%                    |
| TopHat2                | 77.90%                | 77.20%                 | 0.51%                       | 0.01%                              | 77.69%                 | 0.21%                    | 80.44%                                | 78.25%                 | 0.54%                       | 0.02%                              | 78.76%                 | 1.68%                    |
| TopHat2 ann            | 78.01%                | 77.15%                 | 0.55%                       | 0.01%                              | 77.68%                 | 0.33%                    | 80.41%                                | 78.22%                 | 0.62%                       | 0.02%                              | 78.80%                 | 1.61%                    |

Results are shown for simulated unspliced reads from the nuclear genome, and percentages are relative to the total number of such reads. Perfectly mapped reads have all 76 bases correctly placed (accounting for ambiguity in indel placement as described in Methods). Part correctly mapped reads have at least one base correctly placed, but not all 76. Reads mapped near the correct location are those for which no base is correctly placed, but the mapping overlaps with the correct mapping (this may occur in repetitive regions or indicate a bug in the aligner, as for ReadsMap).

**Supplementary Table 8.** Consistency of novel junction calls among protocols.

|                                                      | BAGET ann  | GEM ann      | GEM cons    | GEM cons ann | GSNAP        | GSNAP ann    | GSTRUCT      | GSTRUCT ann  | MapSplice   | MapSplice ann | PALMapper    | PALMapper cons | PASS         | PASS cons    | ReadsMap     | SMALT        | STAR 1-pass  | STAR 1-pass ann | STAR 2-pass  | STAR 2-pass ann | TopHat1     | TopHat1 ann | TopHat2     | TopHat2 ann | Union excluding protocol | Union excluding team |
|------------------------------------------------------|------------|--------------|-------------|--------------|--------------|--------------|--------------|--------------|-------------|---------------|--------------|----------------|--------------|--------------|--------------|--------------|--------------|-----------------|--------------|-----------------|-------------|-------------|-------------|-------------|--------------------------|----------------------|
| <b>A. All novel junctions</b>                        |            |              |             |              |              |              |              |              |             |               |              |                |              |              |              |              |              |                 |              |                 |             |             |             |             |                          |                      |
| BAGET ann                                            | <b>0.7</b> | 0.1          | 0.0         | 0.0          | 0.1          | 0.0          | 0.1          | 0.1          | 0.0         | 0.3           | 0.8          | 0.0            | 0.0          | 0.0          | 0.0          | 11.6         | 0.0          | 0.0             | 0.0          | 0.0             | 0.3         | 0.1         | 0.0         | 0.0         | 12.8                     | 12.8                 |
| GEM ann                                              | 0.0        | <b>139.3</b> | 30.7        | 30.8         | 78.8         | 78.1         | 77.8         | 77.7         | 39.0        | 39.0          | 69.5         | 24.8           | 69.9         | 68.4         | 55.6         | 13.7         | 79.2         | 78.6            | 79.8         | 79.7            | 53.6        | 53.5        | 54.3        | 53.2        | 90.7                     | 86.6                 |
| GEM cons                                             | 0.0        | 98.1         | <b>43.6</b> | 99.8         | 78.1         | 77.3         | 77.4         | 77.1         | 63.0        | 63.0          | 74.4         | 50.1           | 74.7         | 73.9         | 61.7         | 22.1         | 78.2         | 77.2            | 77.9         | 77.8            | 69.7        | 69.6        | 70.5        | 67.8        | 99.9                     | 85.6                 |
| GEM cons ann                                         | 0.0        | 98.3         | 99.9        | <b>43.6</b>  | 78.1         | 77.3         | 77.4         | 77.1         | 63.0        | 63.0          | 74.4         | 50.2           | 74.7         | 73.9         | 61.8         | 22.1         | 78.2         | 77.2            | 77.9         | 77.8            | 69.7        | 69.6        | 70.5        | 67.9        | 100.0                    | 85.7                 |
| GSNAP                                                | 0.0        | 34.4         | 10.7        | 10.7         | <b>319.1</b> | 86.9         | 82.0         | 81.8         | 19.3        | 19.3          | 38.5         | 11.4           | 39.1         | 38.1         | 26.9         | 8.3          | 45.2         | 45.2            | 47.3         | 47.2            | 24.6        | 24.6        | 24.4        | 24.1        | 90.0                     | 54.4                 |
| GSNAP ann                                            | 0.0        | 33.3         | 10.3        | 10.3         | 84.8         | <b>327.1</b> | 88.1         | 88.8         | 18.8        | 19.0          | 38.1         | 11.1           | 37.8         | 36.8         | 25.9         | 7.6          | 43.5         | 43.7            | 46.2         | 46.2            | 23.8        | 23.7        | 23.7        | 23.6        | 94.9                     | 52.6                 |
| GSTRUCT                                              | 0.0        | 32.9         | 10.2        | 10.2         | 79.4         | 87.4         | <b>329.5</b> | 97.0         | 18.6        | 19.0          | 38.1         | 11.0           | 37.5         | 36.6         | 25.7         | 7.5          | 42.9         | 43.1            | 45.7         | 45.7            | 23.7        | 23.6        | 23.6        | 23.3        | 98.3                     | 52.5                 |
| GSTRUCT ann                                          | 0.0        | 32.8         | 10.2        | 10.2         | 78.9         | 87.9         | 96.7         | <b>330.7</b> | 18.5        | 19.0          | 38.0         | 11.0           | 37.4         | 36.4         | 25.6         | 7.5          | 42.8         | 42.9            | 45.6         | 45.6            | 23.5        | 23.5        | 23.4        | 23.3        | 98.3                     | 52.3                 |
| MapSplice                                            | 0.0        | 83.5         | 42.2        | 42.2         | 94.5         | 94.4         | 94.2         | 94.2         | <b>65.1</b> | 98.0          | 86.9         | 42.7           | 88.0         | 86.7         | 67.7         | 20.4         | 93.5         | 93.1            | 94.8         | 94.7            | 66.1        | 66.0        | 67.1        | 66.4        | 99.6                     | 98.5                 |
| MapSplice ann                                        | 0.0        | 81.5         | 40.6        | 40.6         | 92.6         | 92.9         | 92.6         | 92.7         | 93.6        | <b>68.0</b>   | 85.2         | 41.0           | 86.1         | 84.8         | 66.5         | 20.1         | 91.6         | 91.2            | 93.1         | 93.0            | 64.2        | 64.2        | 65.2        | 64.6        | 98.7                     | 97.6                 |
| PALMapper                                            | 0.0        | 5.0          | 1.7         | 1.7          | 6.3          | 6.4          | 6.5          | 6.5          | 2.9         | 3.0           | <b>194.2</b> | 1.9            | 5.7          | 5.6          | 4.0          | 1.0          | 6.0          | 6.0             | 6.8          | 6.8             | 3.8         | 3.8         | 3.8         | 3.7         | 7.8                      | 7.8                  |
| PALMapper cons                                       | 0.0        | 94.8         | 60.1        | 60.1         | 99.5         | 99.6         | 99.6         | 99.6         | 76.3        | 76.0          | 100.0        | <b>36.4</b>    | 97.7         | 96.9         | 73.6         | 28.0         | 99.3         | 99.3            | 99.6         | 99.6            | 83.2        | 83.2        | 83.1        | 83.3        | 100.0                    | 100.0                |
| PASS                                                 | 0.0        | 27.8         | 9.3         | 9.3          | 35.6         | 35.3         | 35.3         | 35.3         | 16.4        | 16.0          | 31.8         | 10.2           | <b>349.8</b> | 72.3         | 22.8         | 5.6          | 34.2         | 34.1            | 35.7         | 35.7            | 20.3        | 20.3        | 20.5        | 20.2        | 74.0                     | 40.0                 |
| PASS cons                                            | 0.0        | 37.0         | 12.5        | 12.5         | 47.1         | 46.7         | 46.8         | 46.7         | 21.9        | 22.0          | 41.9         | 13.7           | 98.2         | <b>257.7</b> | 30.2         | 7.5          | 45.3         | 45.1            | 47.2         | 47.2            | 27.1        | 27.1        | 27.4        | 27.0        | 98.5                     | 52.4                 |
| ReadsMap                                             | 0.0        | 4.3          | 1.5         | 1.5          | 4.7          | 4.7          | 4.7          | 4.6          | 2.4         | 2.5           | 4.2          | 1.5            | 4.4          | 4.3          | <b>181.7</b> | 3.4          | 4.7          | 4.7             | 4.7          | 4.7             | 3.2         | 3.2         | 3.3         | 3.3         | 7.9                      | 7.9                  |
| SMALT                                                | 0.0        | 6.6          | 3.3         | 3.3          | 9.1          | 8.6          | 8.5          | 8.5          | 4.6         | 4.7           | 7.0          | 3.5            | 6.7          | 6.7          | 21.5         | <b>289.8</b> | 7.1          | 7.0             | 7.1          | 7.1             | 5.8         | 5.8         | 5.7         | 5.7         | 26.6                     | 26.6                 |
| STAR 1-pass                                          | 0.0        | 55.4         | 17.1        | 17.1         | 72.3         | 71.5         | 71.0         | 71.0         | 30.5        | 31.0          | 58.5         | 18.1           | 60.0         | 58.6         | 42.8         | 10.3         | <b>199.2</b> | 95.1            | 95.1         | 94.9            | 38.6        | 38.5        | 38.6        | 38.3        | 97.3                     | 78.9                 |
| STAR 1-pass ann                                      | 0.0        | 53.7         | 16.5        | 16.5         | 70.8         | 70.2         | 69.7         | 69.7         | 29.7        | 30.0          | 57.3         | 17.7           | 58.5         | 57.1         | 41.7         | 10.0         | 93.0         | <b>203.7</b>    | 97.8         | 98.0            | 37.4        | 37.4        | 37.5        | 37.5        | 99.6                     | 77.2                 |
| STAR 2-pass                                          | 0.0        | 36.6         | 11.2        | 11.2         | 49.6         | 49.7         | 49.6         | 49.6         | 20.3        | 20.0          | 43.5         | 11.9           | 41.1         | 40.1         | 28.4         | 6.8          | 62.3         | 65.6            | <b>303.8</b> | 99.6            | 25.4        | 25.4        | 25.5        | 25.3        | 99.8                     | 59.1                 |
| STAR 2-pass ann                                      | 0.0        | 36.6         | 11.2        | 11.2         | 49.7         | 49.8         | 49.7         | 49.7         | 20.3        | 21.0          | 43.6         | 12.0           | 41.2         | 40.1         | 28.4         | 6.8          | 62.4         | 65.9            | 99.8         | <b>303.2</b>    | 25.5        | 25.4        | 25.6        | 25.4        | 100.0                    | 59.2                 |
| TopHat1                                              | 0.0        | 81.8         | 33.3        | 33.3         | 86.0         | 85.2         | 85.4         | 85.2         | 47.1        | 48.0          | 80.9         | 33.2           | 77.8         | 76.5         | 64.2         | 18.6         | 84.3         | 83.5            | 84.7         | 84.6            | <b>91.2</b> | 97.6        | 81.5        | 78.7        | 99.1                     | 93.6                 |
| TopHat1 ann                                          | 0.0        | 81.9         | 33.4        | 33.3         | 86.1         | 85.3         | 85.6         | 85.3         | 47.2        | 48.0          | 81.0         | 33.2           | 77.8         | 76.6         | 64.4         | 18.6         | 84.3         | 83.6            | 84.8         | 84.7            | 97.8        | <b>91.0</b> | 81.5        | 78.9        | 99.2                     | 93.7                 |
| TopHat2                                              | 0.0        | 83.2         | 33.9        | 33.8         | 85.9         | 85.4         | 85.5         | 85.3         | 48.1        | 49.0          | 81.2         | 33.3           | 79.0         | 77.8         | 66.7         | 18.3         | 84.7         | 84.2            | 85.4         | 85.3            | 81.8        | 81.7        | <b>90.8</b> | 90.6        | 97.4                     | 93.8                 |
| TopHat2 ann                                          | 0.0        | 86.6         | 34.6        | 34.6         | 90.0         | 90.0         | 89.9         | 90.0         | 50.5        | 51.0          | 84.8         | 35.4           | 82.7         | 81.3         | 69.3         | 19.3         | 89.2         | 89.3            | 90.0         | 90.0            | 83.9        | 83.9        | 96.2        | <b>85.6</b> | 99.3                     | 96.0                 |
| <b>B. Novel junctions with at least two mappings</b> |            |              |             |              |              |              |              |              |             |               |              |                |              |              |              |              |              |                 |              |                 |             |             |             |             |                          |                      |
| BAGET ann                                            | <b>0.1</b> | 0.0          | 0.0         | 0.0          | 0.0          | 0.0          | 0.0          | 0.0          | 0.0         | 0.0           | 0.0          | 0.0            | 0.0          | 0.0          | 0.0          | 7.5          | 0.0          | 0.0             | 0.0          | 0.0             | 0.0         | 0.0         | 0.0         | 0.0         | 7.5                      | 7.5                  |
| GEM ann                                              | 0.0        | <b>82.1</b>  | 46.8        | 46.8         | 84.1         | 83.5         | 83.3         | 83.1         | 54.6        | 55.0          | 77.1         | 37.7           | 78.1         | 76.9         | 62.5         | 18.0         | 84.8         | 84.1            | 85.0         | 84.9            | 63.7        | 63.6        | 64.9        | 63.6        | 94.0                     | 91.2                 |
| GEM cons                                             | 0.0        | 99.0         | <b>39.0</b> | 99.9         | 86.3         | 85.5         | 85.6         | 85.4         | 69.9        | 70.0          | 82.0         | 56.0           | 82.6         | 81.9         | 67.8         | 24.6         | 86.6         | 85.5            | 86.1         | 86.0            | 76.7        | 76.6        | 77.6        | 75.1        | 100.0                    | 93.1                 |
| GEM cons ann                                         | 0.0        | 99.1         | 99.9        | <b>39.0</b>  | 86.3         | 85.5         | 85.7         | 85.4         | 69.9        | 70.0          | 82.0         | 56.1           | 82.7         | 81.9         | 67.8         | 24.7         | 86.6         | 85.6            | 86.2         | 86.1            | 76.7        | 76.6        | 77.6        | 75.1        | 100.0                    | 93.1                 |
| GSNAP                                                | 0.0        | 56.8         | 29.8        | 29.8         | <b>112.3</b> | 92.2         | 88.6         | 87.9         | 41.8        | 42.0          | 61.3         | 28.1           | 62.8         | 61.8         | 45.2         | 14.9         | 67.9         | 67.7            | 69.3         | 69.3            | 45.0        | 45.0        | 45.4        | 44.8        | 95.1                     | 76.1                 |
| GSNAP ann                                            | 0.0        | 55.3         | 28.5        | 28.5         | 89.6         | <b>116.3</b> | 90.9         | 91.6         | 41.2        | 42.0          | 60.7         | 27.4           | 61.2         | 60.2         | 44.0         | 14.0         | 66.1         | 66.2            | 68.3         | 68.3            | 43.7        | 43.7        | 44.2        | 43.9        | 96.4                     | 74.2                 |
| GSTRUCT                                              | 0.0        | 53.3         | 27.5        | 27.5         | 83.3         | 87.7         | <b>121.0</b> | 97.1         | 39.8        | 40.0          | 59.2         | 26.3           | 59.3         | 58.3         | 42.5         | 13.4         | 63.6         | 63.6            | 66.0         | 66.0            | 42.3        | 42.3        | 42.8        | 42.3        | 98.5                     | 72.5                 |
| GSTRUCT ann                                          | 0.0        | 53.1         | 27.3        | 27.2         | 82.5         | 88.2         | 96.8         | <b>121.5</b> | 39.6        | 40.0          | 59.1         | 26.2           | 59.0         | 58.0         | 42.2         | 13.3         | 63.3         | 63.4            | 65.8         | 65.8            | 42.0        | 42.0        | 42.5        | 42.2        | 98.4                     | 72.2                 |
| MapSplice                                            | 0.0        | 85.8         | 54.7        | 54.7         | 94.4         | 94.1         | 94.0         | 93.9         | <b>49.7</b> | 98.0          | 87.9         | 51.2           | 89.4         | 88.3         | 68.2         | 23.7         | 93.7         | 93.3            | 94.5         | 94.4            | 71.0        | 71.0        | 71.7        | 71.0        | 99.6                     | 98.3                 |
| MapSplice ann                                        | 0.0        | 83.4         | 52.8        | 52.8         | 92.2         | 92.2         | 92.0         | 92.0         | 94.3        | <b>51.0</b>   | 85.9         | 49.4           | 87.1         | 86.0         | 66.8         | 23.4         | 91.4         | 91.1            | 92.4         | 92.4            | 68.8        | 68.8        | 69.5        | 68.9        | 98.4                     | 97.1                 |
| PALMapper                                            | 0.0        | 10.0         | 5.0         | 5.0          | 11.9         | 12.0         | 12.1         | 12.1         | 7.2         | 7.3           | <b>641.6</b> | 5.3            | 11.3         | 11.0         | 8.2          | 2.4          | 11.4         | 11.4            | 12.9         | 12.9            | 8.1         | 8.1         | 8.2         | 8.1         | 14.5                     | 14.5                 |
| PALMapper cons                                       | 0.0        | 95.9         | 80.0        | 80.0         | 99.7         | 99.7         | 99.7         | 99.7         | 83.8        | 84.0          | 100.0        | <b>22.9</b>    | 98.8         | 98.2         | 73.5         | 33.3         | 99.6         | 99.6            | 99.7         | 99.6            | 86.6        | 86.5        | 85.9        | 86.1        | 100.0                    | 100.0                |
| PASS                                                 | 0.0        | 49.4         | 28.2        | 28.2         | 57.6         | 57.0         | 57.1         | 57.0         | 37.5        | 38.0          | 54.0         | 27.0           | <b>111.7</b> | 89.8         | 40.2         | 12.3         | 56.1         | 55.8            | 57.3         | 57.3            | 40.0        | 40.0        | 40.6        | 39.9        | 90.9                     | 62.2                 |
| PASS cons                                            | 0.0        | 55.7         | 32.2        | 32.2         | 64.7         | 64.0         | 64.1         | 64.0         | 42.5        | 43.0          | 60.6         | 30.7           | 99.7         | <b>96.7</b>  | 45.2         | 14.0         | 63.1         | 62.7            | 64.3         | 64.2            | 45.2        | 45.2        | 45.9        | 45.1        | 99.8                     | 69.3                 |
| ReadsMap                                             | 0.0        | 6.7          | 2.9         | 2.9          | 7.2          | 7.1          | 7.1          | 7.1          | 4.2         | 4.3           | 6.5          | 2.7            | 6.8          | 6.6          | <b>902.4</b> | 5.1          | 7.2          | 7.2             | 7.3          | 7.3             | 5.2         | 5.2         | 5.4         | 5.3         | 11.9                     | 11.9                 |
| SMALT                                                | 0.0        | 5.3          | 4.0         | 4.0          | 6.5          | 6.2          | 6.2          | 6.2          | 4.3         | 4.5           | 5.7          | 3.7            | 5.3          | 5.3          | 28.9         | <b>160.8</b> | 5.5          | 5.5             | 5.5          | 5.5             | 4.9         | 4.8         | 4.8         | 4.8         | 32.4                     | 32.4                 |
| STAR 1-pass                                          | 0.0        | 72.7         | 39.6        | 39.6         | 84.9         | 84.0         | 83.6         | 83.4         | 53.0        | 53.0          | 74.6         | 36.5           | 77.0         | 75.8         | 56.9         | 17.2         | <b>84.8</b>  | 97.0            | 97.0         | 96.9            | 57.1        | 57.0        | 57.6        | 57.1        | 98.7                     | 90.0                 |
| STAR 1-pass ann                                      | 0.0        | 72.0         | 39.0        | 39.0         | 84.7         | 84.2         | 83.6         | 83.6         | 52.7        | 53.0          | 74.5         | 36.5           | 76.7         | 75.5         | 56.6         | 17.2         | 96.9         | <b>84.6</b>     | 98.6         | 98.8            | 56.5        | 56.4        | 57.1        | 57.2        | 99.9                     | 89.8                 |
| STAR 2-pass                                          | 0.0        | 44.5         | 19.1        | 19.1         | 56.1         | 56.1         | 56.0         | 56.0         | 30.0        | 30.0          | 52.5         | 19.1           | 49.4         | 48.3         | 35.4         | 9.3          | 63.5         | 64.0            | <b>175.8</b> | 99.7            | 33.2        | 33.1        | 33.6        | 33.3        | 99.8                     | 65.2                 |
| STAR 2-pass ann                                      | 0.0        | 44.5         | 19.2        | 19.2         | 56.2</       |              |              |              |             |               |              |                |              |              |              |              |              |                 |              |                 |             |             |             |             |                          |                      |

**Supplementary Table 9.** Accuracy of junction discovery on simulated data.

|                        | True junctions |        |        |        |        |        |        | False junctions |        |        |        |        |        |        |
|------------------------|----------------|--------|--------|--------|--------|--------|--------|-----------------|--------|--------|--------|--------|--------|--------|
|                        | 1              | 2      | 3      | 4      | 5      | 6      | 7      | 1               | 2      | 3      | 4      | 5      | 6      | 7      |
| <b>A. Simulation 1</b> |                |        |        |        |        |        |        |                 |        |        |        |        |        |        |
| BAGET ann              | 77524          | 73129  | 69942  | 67549  | 65546  | 63737  | 62130  | 5144            | 3397   | 2752   | 2372   | 2150   | 1972   | 1810   |
| GEM ann                | 116613         | 110636 | 105531 | 101265 | 97581  | 94269  | 91300  | 9193            | 5090   | 3887   | 3238   | 2774   | 2488   | 2266   |
| GEM cons               | 97700          | 97566  | 97408  | 96169  | 94150  | 91740  | 89266  | 4689            | 3479   | 2986   | 2638   | 2330   | 2125   | 1956   |
| GEM cons ann           | 108106         | 104597 | 101922 | 99273  | 96423  | 93548  | 90804  | 6251            | 4192   | 3456   | 2999   | 2593   | 2345   | 2142   |
| GSNAP                  | 118830         | 110947 | 104976 | 100267 | 96217  | 92799  | 89723  | 13287           | 5128   | 3814   | 3103   | 2613   | 2321   | 2097   |
| GSNAP ann              | 120817         | 113861 | 108589 | 104300 | 100616 | 97362  | 94503  | 18539           | 8208   | 5822   | 4546   | 3784   | 3276   | 2863   |
| GSTRUCT                | 119584         | 112315 | 106793 | 103804 | 100703 | 97788  | 95044  | 8890            | 3531   | 2832   | 2434   | 2184   | 2017   | 1869   |
| GSTRUCT ann            | 119779         | 112836 | 108494 | 104821 | 101315 | 98144  | 95322  | 8447            | 3207   | 2522   | 2172   | 1925   | 1743   | 1599   |
| MapSplice              | 115689         | 111331 | 106663 | 102584 | 99019  | 95922  | 93075  | 4071            | 1970   | 1595   | 1348   | 1190   | 1072   | 991    |
| MapSplice ann          | 119040         | 112564 | 107469 | 103222 | 99589  | 96460  | 93553  | 22445           | 6504   | 3917   | 2911   | 2369   | 2066   | 1862   |
| PALMapper              | 117210         | 110112 | 105936 | 102172 | 98686  | 95554  | 92752  | 283036          | 68956  | 41034  | 29074  | 22520  | 18426  | 15638  |
| PALMapper ann          | 118654         | 111714 | 107418 | 103686 | 100219 | 97046  | 94199  | 325933          | 78723  | 49658  | 37117  | 29991  | 25270  | 21978  |
| PALMapper cons         | 106353         | 102086 | 95731  | 90320  | 85874  | 81982  | 78553  | 7272            | 4538   | 3554   | 3032   | 2691   | 2421   | 2240   |
| PALMapper cons ann     | 108253         | 107507 | 105178 | 101959 | 98239  | 94967  | 91997  | 43234           | 28946  | 23061  | 19391  | 16956  | 15108  | 13703  |
| PASS                   | 114014         | 105797 | 99743  | 94885  | 90900  | 87485  | 84486  | 62605           | 16760  | 10401  | 7826   | 6305   | 5292   | 4683   |
| PASS cons              | 113828         | 105707 | 99696  | 94840  | 90868  | 87453  | 84450  | 37293           | 12528  | 8437   | 6607   | 5486   | 4722   | 4221   |
| ReadsMap               | 114148         | 109812 | 105452 | 101661 | 98320  | 95360  | 92693  | 898713          | 421115 | 272289 | 199817 | 156865 | 128492 | 108555 |
| SMALT                  | 50497          | 41008  | 35546  | 31504  | 28431  | 25900  | 23692  | 140685          | 92591  | 77404  | 67930  | 60578  | 54614  | 49584  |
| STAR 1-pass            | 116236         | 107929 | 101799 | 96986  | 92896  | 89402  | 86334  | 6528            | 2563   | 2082   | 1796   | 1604   | 1457   | 1357   |
| STAR 1-pass ann        | 119007         | 111394 | 105572 | 100953 | 97035  | 93664  | 90790  | 20226           | 10056  | 7323   | 5832   | 4871   | 4182   | 3678   |
| STAR 2-pass            | 117081         | 112014 | 107278 | 103202 | 99619  | 96518  | 93727  | 11579           | 5088   | 3789   | 3105   | 2640   | 2327   | 2092   |
| STAR 2-pass ann        | 119222         | 113383 | 108425 | 104253 | 100619 | 97497  | 94668  | 21203           | 10324  | 7305   | 5776   | 4765   | 4066   | 3570   |
| TopHat1                | 108779         | 105599 | 101942 | 98446  | 95189  | 92246  | 89518  | 7709            | 5594   | 4515   | 3859   | 3425   | 3090   | 2828   |
| TopHat1 ann            | 113180         | 108599 | 104170 | 100270 | 96754  | 93677  | 90817  | 8373            | 6179   | 5044   | 4306   | 3822   | 3431   | 3181   |
| TopHat2                | 109673         | 106504 | 102741 | 99093  | 95857  | 93022  | 90460  | 7891            | 5565   | 4471   | 3847   | 3405   | 3042   | 2789   |
| TopHat2 ann            | 115945         | 111117 | 106709 | 102838 | 99397  | 96425  | 93768  | 24336           | 14583  | 10354  | 8036   | 6571   | 5573   | 4817   |
| Truth                  | 122745         | 116040 | 110976 | 106744 | 103132 | 99965  | 97158  | 0               | 0      | 0      | 0      | 0      | 0      | 0      |
| <b>B. Simulation 2</b> |                |        |        |        |        |        |        |                 |        |        |        |        |        |        |
| BAGET ann              | 76953          | 72955  | 70245  | 68042  | 66147  | 64426  | 62806  | 6331            | 3900   | 3077   | 2651   | 2417   | 2238   | 2059   |
| GEM ann                | 112359         | 107048 | 102924 | 99412  | 96309  | 93360  | 90819  | 22293           | 12427  | 9024   | 7213   | 6154   | 5368   | 4820   |
| GEM cons               | 91373          | 91235  | 91121  | 90396  | 89195  | 87536  | 85811  | 12622           | 8403   | 6631   | 5539   | 4854   | 4320   | 3908   |
| GEM cons ann           | 105415         | 101642 | 99134  | 96816  | 94557  | 92150  | 89914  | 14782           | 9433   | 7314   | 6059   | 5271   | 4663   | 4214   |
| GSNAP                  | 119276         | 112394 | 107561 | 103605 | 100140 | 97025  | 94184  | 30694           | 7716   | 5394   | 4324   | 3651   | 3238   | 2904   |
| GSNAP ann              | 121420         | 115406 | 111206 | 107760 | 104783 | 102064 | 99575  | 36639           | 11359  | 7861   | 6122   | 5071   | 4369   | 3834   |
| GSTRUCT                | 119916         | 113667 | 109264 | 106977 | 104638 | 102230 | 99927  | 23071           | 5778   | 4306   | 3672   | 3243   | 2984   | 2747   |
| GSTRUCT ann            | 120215         | 114371 | 111153 | 108142 | 105364 | 102725 | 100330 | 22613           | 5374   | 3990   | 3378   | 2943   | 2675   | 2468   |
| MapSplice              | 109651         | 106509 | 102957 | 99736  | 96811  | 94145  | 91687  | 9306            | 4601   | 3771   | 3314   | 2914   | 2682   | 2473   |
| MapSplice ann          | 116470         | 110275 | 105742 | 101987 | 98721  | 95808  | 93193  | 33963           | 11203  | 7265   | 5771   | 5000   | 4495   | 4121   |
| PALMapper              | 115685         | 109797 | 106564 | 103574 | 100882 | 98237  | 95802  | 383917          | 77636  | 47553  | 34831  | 27834  | 23504  | 20514  |
| PALMapper ann          | 118141         | 112197 | 108627 | 105585 | 102755 | 100080 | 97660  | 528217          | 103303 | 63781  | 48099  | 39411  | 33881  | 29788  |
| PALMapper cons         | 103937         | 102080 | 98619  | 94685  | 90861  | 87281  | 84023  | 12261           | 9066   | 7610   | 6713   | 6090   | 5580   | 5172   |
| PALMapper cons ann     | 105888         | 105474 | 104422 | 102703 | 100485 | 97936  | 95344  | 59119           | 41790  | 34471  | 29873  | 26574  | 24057  | 21988  |
| PASS                   | 107833         | 100322 | 95225  | 91084  | 87380  | 84195  | 81312  | 125292          | 31174  | 19369  | 14724  | 12254  | 10596  | 9388   |
| PASS cons              | 107558         | 100128 | 95030  | 90853  | 87142  | 83988  | 81057  | 77363           | 24454  | 16074  | 12487  | 10536  | 9205   | 8258   |
| ReadsMap               | 109047         | 105544 | 102270 | 99308  | 96640  | 94122  | 91777  | 942684          | 415590 | 259006 | 184541 | 141596 | 113825 | 94466  |
| SMALT                  | 50726          | 41116  | 35239  | 30947  | 27516  | 24694  | 22277  | 181841          | 103528 | 82418  | 70436  | 61738  | 54887  | 49302  |
| STAR 1-pass            | 110301         | 102851 | 97694  | 93452  | 89795  | 86566  | 83641  | 14893           | 4526   | 3471   | 2883   | 2563   | 2322   | 2130   |
| STAR 1-pass ann        | 116771         | 109902 | 105140 | 101334 | 97941  | 94936  | 92329  | 31696           | 12485  | 9022   | 7239   | 6063   | 5289   | 4655   |
| STAR 2-pass            | 113032         | 108903 | 105346 | 102261 | 99503  | 96811  | 94492  | 22749           | 8721   | 6366   | 5282   | 4581   | 4082   | 3690   |
| STAR 2-pass ann        | 117144         | 112022 | 108147 | 104872 | 101968 | 99188  | 96774  | 32855           | 14117  | 9979   | 8051   | 6782   | 5913   | 5236   |
| TopHat1                | 101390         | 98839  | 96117  | 93382  | 90861  | 88449  | 86201  | 11384           | 8223   | 6557   | 5540   | 4875   | 4351   | 3951   |
| TopHat1 ann            | 108919         | 104901 | 101269 | 98035  | 95122  | 92459  | 89994  | 12275           | 8946   | 7196   | 6076   | 5320   | 4735   | 4303   |
| TopHat2                | 104273         | 101654 | 98660  | 95567  | 92706  | 90090  | 87728  | 9568            | 7242   | 6027   | 5280   | 4722   | 4266   | 3921   |
| TopHat2 ann            | 113564         | 109175 | 105494 | 102149 | 99129  | 96421  | 93937  | 26389           | 16514  | 12196  | 9786   | 8179   | 7059   | 6227   |
| Truth                  | 123581         | 117890 | 113826 | 110530 | 107667 | 105088 | 102713 | 0               | 0      | 0      | 0      | 0      | 0      | 0      |

Number of unique junctions reported for the two simulated data sets, at a range of thresholds (1-7) for the number of primary alignments supporting a junction. Higher thresholds correspond to a more conservative interpretation of alignment results. Junctions were classified as true and false by comparison to the true simulated alignments. The row labeled "Truth" shows the result expected for a perfect aligner.



**Supplementary Table 10.** Number of introns reported per alignment.

|                                                 | Primary alignments |          |           |           |           | All alignments |            |           |           |           |           |           |
|-------------------------------------------------|--------------------|----------|-----------|-----------|-----------|----------------|------------|-----------|-----------|-----------|-----------|-----------|
|                                                 | 0 introns          | 1 intron | 2 introns | 3 introns | 4 introns | 5 introns      | 0 introns  | 1 intron  | 2 introns | 3 introns | 4 introns | 5 introns |
| <b>A. K562 whole cell replicate 1</b>           |                    |          |           |           |           |                |            |           |           |           |           |           |
| BAGET ann                                       | 187077254          | 19044438 | 0         | 0         | 0         | 0              | 190657737  | 19044438  | 0         | 0         | 0         | 0         |
| GEM ann                                         | 171310851          | 34730775 | 1064776   | 1509      | 0         | 0              | 499923501  | 76562905  | 13247099  | 429798    | 3108      | 0         |
| GEM cons                                        | 171601899          | 34567687 | 898840    | 209       | 0         | 0              | 494153538  | 69729534  | 8070043   | 378798    | 2443      | 0         |
| GEM cons ann                                    | 171519716          | 34628760 | 938481    | 1012      | 0         | 0              | 495520648  | 72100675  | 8478289   | 385549    | 2445      | 0         |
| GSNAP                                           | 169869232          | 36780143 | 403327    | 2387      | 14        | 0              | 222746918  | 39531697  | 411451    | 2541      | 14        | 0         |
| GSNAP ann                                       | 155959666          | 49495787 | 1595726   | 11463     | 35        | 0              | 207664707  | 53698921  | 1707068   | 12197     | 36        | 0         |
| GSTRUCT                                         | 160220367          | 45290527 | 1586733   | 9674      | 38        | 0              | 222315512  | 54330580  | 1848701   | 10801     | 39        | 0         |
| GSTRUCT ann                                     | 157984101          | 47426882 | 1683304   | 10286     | 37        | 0              | 209374754  | 54242555  | 1855777   | 11163     | 39        | 0         |
| MapSplice                                       | 155715733          | 40229115 | 1062125   | 1353      | 0         | 0              | 158023362  | 40229125  | 1062125   | 1353      | 0         | 0         |
| MapSplice ann                                   | 156017042          | 39908235 | 1068363   | 1869      | 0         | 0              | 158330301  | 39908238  | 1068363   | 1869      | 0         | 0         |
| PALMapper                                       | 158313084          | 43659317 | 2733642   | 0         | 0         | 0              | 1615733787 | 98720318  | 9598992   | 0         | 0         | 0         |
| PALMapper cons                                  | 60036227           | 8633289  | 25053     | 0         | 0         | 0              | 145387747  | 19789755  | 82347     | 0         | 0         | 0         |
| PASS                                            | 171743999          | 25222924 | 115456    | 6         | 0         | 0              | 173860480  | 26029419  | 115739    | 6         | 0         | 0         |
| PASS cons                                       | 167272372          | 24802361 | 114869    | 6         | 0         | 0              | 168590407  | 25496149  | 115053    | 6         | 0         | 0         |
| ReadsMap                                        | 115308436          | 47132457 | 2282147   | 61828     | 135       | 1              | 142468047  | 54354636  | 2811288   | 104747    | 158       | 1         |
| SMALT                                           | 198636832          | 6370637  | 0         | 0         | 0         | 0              | 200297027  | 6370637   | 0         | 0         | 0         | 0         |
| STAR 1-pass                                     | 171619910          | 31320692 | 260829    | 357       | 0         | 0              | 189704784  | 33803026  | 272426    | 374       | 0         | 0         |
| STAR 1-pass ann                                 | 153632518          | 48484160 | 1426139   | 35255     | 16        | 0              | 168619810  | 52590167  | 1583953   | 37982     | 20        | 0         |
| STAR 2-pass                                     | 150202827          | 51651315 | 1653897   | 39505     | 68        | 0              | 168220716  | 62174408  | 2662407   | 52111     | 164       | 0         |
| STAR 2-pass ann                                 | 150004846          | 51809144 | 1671503   | 40203     | 70        | 0              | 168011972  | 62573092  | 2707290   | 53504     | 168       | 0         |
| TopHat1                                         | 155458487          | 31685988 | 1321699   | 4249      | 2         | 0              | 169288810  | 32281213  | 1508011   | 7658      | 6         | 0         |
| TopHat1 ann                                     | 155458440          | 31765329 | 1311500   | 7347      | 9         | 0              | 169300835  | 32399210  | 1499216   | 12984     | 14        | 0         |
| TopHat2                                         | 147253729          | 36710072 | 1204310   | 6029      | 3         | 0              | 163857967  | 38962028  | 1249600   | 6498      | 4         | 0         |
| TopHat2 ann                                     | 140335591          | 46878285 | 1637296   | 27952     | 23        | 0              | 154155848  | 51536690  | 1841780   | 55839     | 46        | 0         |
| <b>B. K562 whole cell replicate 2</b>           |                    |          |           |           |           |                |            |           |           |           |           |           |
| BAGET ann                                       | 197805101          | 17665445 | 0         | 0         | 0         | 0              | 204566639  | 17665445  | 0         | 0         | 0         | 0         |
| GEM ann                                         | 185275025          | 33132187 | 851569    | 15660     | 0         | 0              | 539610202  | 69130436  | 8433960   | 388289    | 215       | 0         |
| GEM cons                                        | 185615881          | 32821350 | 795067    | 209       | 0         | 0              | 533876729  | 61377573  | 4873485   | 204158    | 2170      | 0         |
| GEM cons ann                                    | 185536089          | 32882879 | 833009    | 861       | 0         | 0              | 535319029  | 63471618  | 5318079   | 228545    | 2170      | 0         |
| GSNAP                                           | 182769289          | 36179016 | 364673    | 2077      | 8         | 0              | 246051100  | 38691591  | 373129    | 2257      | 10        | 0         |
| GSNAP ann                                       | 167694005          | 50170089 | 1526399   | 11917     | 25        | 0              | 229895554  | 53925349  | 1628445   | 13450     | 27        | 0         |
| GSTRUCT                                         | 173861658          | 44234621 | 1412799   | 9059      | 22        | 0              | 262536766  | 54202009  | 1640658   | 10504     | 22        | 0         |
| GSTRUCT ann                                     | 172181493          | 45847374 | 1466966   | 10111     | 28        | 0              | 254420149  | 54043823  | 1657727   | 11527     | 28        | 0         |
| MapSplice                                       | 161505723          | 36819919 | 910651    | 1197      | 0         | 0              | 167168530  | 36819931  | 910651    | 1197      | 0         | 0         |
| MapSplice ann                                   | 161906407          | 36398227 | 886835    | 1465      | 0         | 0              | 167579746  | 36398233  | 886835    | 1465      | 0         | 0         |
| PALMapper                                       | 164821984          | 44270722 | 3460350   | 0         | 0         | 0              | 1692507126 | 102137645 | 11501769  | 0         | 0         | 0         |
| PALMapper cons                                  | 107664915          | 15415151 | 67570     | 0         | 0         | 0              | 107664915  | 15415151  | 67570     | 0         | 0         | 0         |
| PASS                                            | 176544216          | 22968986 | 102988    | 3         | 0         | 0              | 178806957  | 23480856  | 103265    | 6         | 0         | 0         |
| PASS cons                                       | 165095387          | 22162161 | 102235    | 4         | 0         | 0              | 166432987  | 22527135  | 102409    | 6         | 0         | 0         |
| SMALT                                           | 209130532          | 6127506  | 0         | 0         | 0         | 0              | 210307069  | 6127506   | 0         | 0         | 0         | 0         |
| STAR 1-pass                                     | 181284498          | 30131002 | 236178    | 252       | 0         | 0              | 201282547  | 32495226  | 246466    | 265       | 0         | 0         |
| STAR 1-pass ann                                 | 163348660          | 48075196 | 1316387   | 37029     | 6         | 0              | 180032268  | 52109009  | 1454382   | 40190     | 13        | 0         |
| STAR 2-pass                                     | 159706127          | 51458084 | 1556531   | 42043     | 41        | 0              | 179508185  | 62397070  | 2526198   | 55231     | 116       | 0         |
| STAR 2-pass ann                                 | 159514745          | 51624217 | 1571320   | 42549     | 43        | 0              | 179324495  | 62854431  | 2567410   | 56279     | 121       | 0         |
| TopHat1                                         | 149782758          | 29146862 | 1049421   | 4511      | 28        | 0              | 164950835  | 29832399  | 1242963   | 19291     | 56        | 1         |
| TopHat1 ann                                     | 149783322          | 29183515 | 1072472   | 6439      | 24        | 0              | 164962013  | 29912688  | 1282587   | 24737     | 42        | 0         |
| TopHat2                                         | 139741709          | 33321108 | 1028619   | 5325      | 0         | 0              | 156890641  | 35541225  | 1062079   | 5479      | 0         | 0         |
| TopHat2 ann                                     | 132677412          | 42947041 | 1435715   | 29132     | 6         | 0              | 146628377  | 46898096  | 1615166   | 56043     | 7         | 0         |
| <b>C. K562 cytoplasmic fraction replicate 1</b> |                    |          |           |           |           |                |            |           |           |           |           |           |
| BAGET ann                                       | 208521101          | 28241977 | 0         | 0         | 0         | 0              | 212070658  | 28241977  | 0         | 0         | 0         | 0         |
| GEM ann                                         | 197702900          | 40606845 | 1134440   | 1230      | 0         | 0              | 493631577  | 77253508  | 9906030   | 216131    | 1004      | 0         |
| GEM cons                                        | 197967587          | 40352093 | 1087093   | 190       | 0         | 0              | 488624837  | 69430179  | 7101212   | 101765    | 426       | 0         |
| GEM cons ann                                    | 197887670          | 40413389 | 1125713   | 1137      | 0         | 0              | 489553614  | 71590585  | 7396418   | 94242     | 162       | 0         |
| GSNAP                                           | 195321629          | 43621344 | 451596    | 2673      | 15        | 0              | 250621888  | 46533423  | 460979    | 2806      | 17        | 0         |
| GSNAP ann                                       | 179534877          | 58044452 | 1822973   | 9814      | 24        | 0              | 233740631  | 62778133  | 1962993   | 10388     | 24        | 0         |
| GSTRUCT                                         | 188613775          | 49280508 | 1717291   | 8100      | 26        | 0              | 257506322  | 64135677  | 2357715   | 9061      | 26        | 0         |
| GSTRUCT ann                                     | 185601418          | 52112656 | 1894798   | 9080      | 28        | 0              | 249941538  | 64060885  | 2380522   | 9518      | 28        | 0         |
| MapSplice                                       | 180858050          | 49673933 | 1318983   | 1094      | 0         | 0              | 182639049  | 49673956  | 1318983   | 1094      | 0         | 0         |
| MapSplice ann                                   | 181899665          | 48648848 | 1276719   | 2309      | 0         | 0              | 183671968  | 48648855  | 1276719   | 2309      | 0         | 0         |
| PASS                                            | 200240345          | 31338049 | 142379    | 7         | 0         | 0              | 201821496  | 31749762  | 142891    | 7         | 0         | 0         |
| PASS cons                                       | 196768072          | 30949027 | 141723    | 6         | 0         | 0              | 197592326  | 31222304  | 142046    | 6         | 0         | 0         |
| ReadsMap                                        | 140851097          | 60522677 | 2872481   | 107427    | 28        | 0              | 178414125  | 69875721  | 3461753   | 234391    | 39        | 0         |
| SMALT                                           | 220887722          | 7544213  | 0         | 0         | 0         | 0              | 221684991  | 7544213   | 0         | 0         | 0         | 0         |
| STAR 1-pass                                     | 195727486          | 37897252 | 324449    | 373       | 0         | 0              | 215758379  | 40394998  | 335875    | 386       | 0         | 0         |
| STAR 1-pass ann                                 | 173885738          | 58529123 | 1736876   | 127424    | 11        | 0              | 191298592  | 63538256  | 1915457   | 129617    | 12        | 0         |
| STAR 2-pass                                     | 166816809          | 65075051 | 2176309   | 136258    | 54        | 1              | 190222297  | 81106244  | 3686507   | 156631    | 159       | 2         |
| STAR 2-pass ann                                 | 166571761          | 65289207 | 2186183   | 137206    | 58        | 1              | 190002411  | 81790333  | 3749852   | 158565    | 163       | 2         |
| TopHat1                                         | 179661623          | 36831248 | 1344808   | 6148      | 3         | 0              | 195310467  | 37339628  | 1491492   | 13720     | 9         | 0         |
| TopHat1 ann                                     | 179660581          | 36913991 | 1351375   | 6896      | 4         | 0              | 195359319  | 37471945  | 1492452   | 12005     | 9         | 0         |
| TopHat2                                         | 170911303          | 44935030 | 1410915   | 5034      | 0         | 0              | 195605668  | 49344971  | 1519378   | 6374      | 0         | 0         |
| TopHat2 ann                                     | 161001926          | 57456987 | 2047066   | 116223    | 34        | 0              | 181974554  | 64861853  | 2429409   | 212221    | 51        | 0         |
| <b>D. K562 cytoplasmic fraction replicate 2</b> |                    |          |           |           |           |                |            |           |           |           |           |           |
| BAGET ann                                       | 146679343          | 18913128 | 0         | 0         | 0         | 0              | 149493992  | 18913128  | 0         | 0         | 0         | 0         |
| GEM ann                                         | 133664041          | 33050924 | 878073    | 1183      | 0         | 0              | 364341755  | 69827925  | 9762875   | 283774    | 227       | 0         |
| GEM cons                                        | 133880600          | 32852609 | 832767    | 227       | 0         | 0              | 360205170  | 63087139  | 7306424   | 116213    | 620       | 0         |
| GEM cons ann                                    | 133794150          | 32919330 | 871043    | 968       | 0         | 0              | 361093746  | 65076885  | 7579619   | 117473    | 75        | 0         |
| GSNAP                                           | 132905278          | 34363515 | 337927    | 1960      | 3         | 0              | 165065576  | 36381786  | 343986    | 2063      | 3         | 0         |
| GSNAP ann                                       | 121020777          | 45309882 | 1287171   | 6066      | 16        | 0              | 152256757  | 48498217  | 1357665   | 6492      | 16        | 0         |
| GSTRUCT                                         | 126275712          | 40116144 | 1346547   | 5748      | 18        | 0              | 163482441  | 49159012  | 1687419   | 6252      | 18        | 0         |





|                        | Primary alignments |          |           |           |           |           | All alignments |          |           |           |           |           |
|------------------------|--------------------|----------|-----------|-----------|-----------|-----------|----------------|----------|-----------|-----------|-----------|-----------|
|                        | 0 introns          | 1 intron | 2 introns | 3 introns | 4 introns | 5 introns | 0 introns      | 1 intron | 2 introns | 3 introns | 4 introns | 5 introns |
| TopHat1 ann            | 89822004           | 7109187  | 244436    | 2428      | 62        | 0         | 97520713       | 7159649  | 253887    | 2588      | 64        | 0         |
| TopHat2                | 89216210           | 7853672  | 258284    | 1668      | 0         | 0         | 101874048      | 8062729  | 262267    | 1711      | 0         | 0         |
| TopHat2 ann            | 88490497           | 8865297  | 321994    | 4119      | 88        | 0         | 98587259       | 9357618  | 341839    | 4300      | 88        | 0         |
| <b>H. Simulation 1</b> |                    |          |           |           |           |           |                |          |           |           |           |           |
| BAGET ann              | 71619289           | 7243380  | 0         | 0         | 0         | 0         | 72438310       | 7243380  | 0         | 0         | 0         | 0         |
| GEM ann                | 67895614           | 11620668 | 404930    | 2038      | 0         | 0         | 165877216      | 21162135 | 1610192   | 11556     | 22        | 0         |
| GEM cons               | 67993410           | 11540114 | 369445    | 285       | 0         | 0         | 165099634      | 19616501 | 1116746   | 2305      | 0         | 0         |
| GEM cons ann           | 67923682           | 11592880 | 400762    | 1902      | 0         | 0         | 165500190      | 20423970 | 1355142   | 7442      | 19        | 0         |
| GSNAP                  | 68655070           | 10552570 | 183396    | 2029      | 19        | 0         | 80840006       | 10999735 | 187525    | 2031      | 19        | 0         |
| GSNAP ann              | 65523836           | 13357541 | 511492    | 8496      | 193       | 0         | 77578022       | 13982407 | 536732    | 8498      | 193       | 0         |
| GSTRUCT                | 65645586           | 13235700 | 517317    | 8182      | 173       | 0         | 72687872       | 13849148 | 531732    | 8207      | 173       | 0         |
| GSTRUCT ann            | 65455071           | 13417975 | 524927    | 8385      | 173       | 0         | 71751504       | 13774977 | 531934    | 8388      | 173       | 0         |
| MapSplice              | 65759487           | 12673956 | 450754    | 2255      | 7         | 0         | 71522223       | 12682474 | 450844    | 2255      | 7         | 0         |
| MapSplice ann          | 65654189           | 12822124 | 466648    | 2542      | 8         | 0         | 71412112       | 12829010 | 466776    | 2542      | 8         | 0         |
| PALMapper              | 65223152           | 13245519 | 211792    | 74        | 8         | 0         | 650778760      | 34807250 | 296256    | 276       | 21        | 0         |
| PALMapper ann          | 64762109           | 13687402 | 285014    | 60        | 8         | 0         | 649459058      | 37952667 | 447335    | 276       | 21        | 0         |
| PALMapper cons         | 58013224           | 6615783  | 17596     | 0         | 0         | 0         | 86278432       | 8411815  | 19808     | 0         | 0         | 0         |
| PALMapper cons ann     | 66026622           | 11986230 | 182774    | 10        | 0         | 0         | 308967867      | 19314514 | 225714    | 32        | 2         | 0         |
| PASS                   | 67661818           | 9840645  | 71539     | 27        | 0         | 0         | 68505088       | 9924704  | 71705     | 27        | 0         | 0         |
| PASS cons              | 66930406           | 9789895  | 71387     | 27        | 0         | 0         | 67528822       | 9830463  | 71431     | 27        | 0         | 0         |
| ReadsMap               | 53769449           | 15043852 | 1461515   | 121373    | 4855      | 30        | 60544097       | 15956506 | 1583285   | 132148    | 5132      | 30        |
| SMALT                  | 74725141           | 2655012  | 0         | 0         | 0         | 0         | 74854021       | 2655012  | 0         | 0         | 0         | 0         |
| STAR 1-pass            | 69477331           | 9422613  | 116704    | 346       | 0         | 0         | 73248740       | 9807635  | 121345    | 346       | 0         | 0         |
| STAR 1-pass ann        | 65688823           | 12927586 | 452392    | 8511      | 228       | 0         | 69505024       | 13655950 | 495790    | 9510      | 233       | 1         |
| STAR 2-pass            | 65533283           | 13070836 | 472720    | 8758      | 209       | 0         | 69397907       | 13798019 | 530437    | 10221     | 226       | 0         |
| STAR 2-pass ann        | 65396794           | 13190256 | 486595    | 9129      | 220       | 0         | 69287811       | 14134611 | 559707    | 10894     | 238       | 1         |
| TopHat1                | 64563528           | 11337574 | 443740    | 6547      | 41        | 0         | 66733540       | 11483082 | 465724    | 6915      | 41        | 0         |
| TopHat1 ann            | 64560841           | 11429576 | 465337    | 7337      | 142       | 0         | 66734561       | 11583780 | 488154    | 7702      | 153       | 0         |
| TopHat2                | 62535958           | 12139147 | 483319    | 7601      | 45        | 0         | 66201271       | 12550205 | 500929    | 7705      | 45        | 0         |
| TopHat2 ann            | 61436183           | 13067748 | 555565    | 10513     | 292       | 0         | 64401859       | 13755211 | 606975    | 11567     | 295       | 0         |
| <b>I. Simulation 2</b> |                    |          |           |           |           |           |                |          |           |           |           |           |
| BAGET ann              | 70075321           | 7339683  | 0         | 0         | 0         | 0         | 72248546       | 7339683  | 0         | 0         | 0         | 0         |
| GEM ann                | 68175403           | 11000317 | 343047    | 2378      | 5         | 0         | 168057919      | 21101019 | 1893735   | 14365     | 32        | 0         |
| GEM cons               | 68381701           | 10800863 | 302917    | 436       | 0         | 0         | 167084140      | 19138153 | 1371492   | 5152      | 0         | 0         |
| GEM cons ann           | 68230123           | 10945100 | 337369    | 2119      | 5         | 0         | 167467722      | 19973685 | 1596525   | 9704      | 16        | 0         |
| GSNAP                  | 67502298           | 10688746 | 170716    | 1275      | 13        | 0         | 80649602       | 11221314 | 176598    | 1283      | 13        | 0         |
| GSNAP ann              | 63884518           | 13975304 | 512648    | 7390      | 102       | 2         | 76939310       | 14761371 | 554446    | 7409      | 102       | 2         |
| GSTRUCT                | 64091183           | 13880674 | 509423    | 6581      | 62        | 1         | 71586151       | 14577724 | 535411    | 6624      | 62        | 1         |
| GSTRUCT ann            | 63903567           | 14056596 | 518470    | 6965      | 95        | 1         | 70899214       | 14590806 | 538133    | 6975      | 95        | 1         |
| MapSplice              | 63972131           | 11366972 | 350883    | 1924      | 6         | 0         | 69298637       | 11373139 | 351091    | 1924      | 6         | 0         |
| MapSplice ann          | 63736012           | 11730852 | 358910    | 2314      | 14        | 0         | 69046142       | 11734861 | 359129    | 2318      | 14        | 0         |
| PALMapper              | 63372043           | 13871065 | 180109    | 48        | 2         | 0         | 615694813      | 43911626 | 306150    | 335       | 14        | 0         |
| PALMapper ann          | 62590372           | 14732160 | 272967    | 45        | 2         | 0         | 615958105      | 51083521 | 562036    | 335       | 14        | 0         |
| PALMapper cons         | 60732770           | 7062992  | 19571     | 0         | 0         | 0         | 168635025      | 9846617  | 22824     | 0         | 0         | 0         |
| PALMapper cons ann     | 62858130           | 12438785 | 157020    | 3         | 0         | 0         | 276166832      | 21541293 | 230330    | 5         | 0         | 0         |
| PASS                   | 63588965           | 8487179  | 45659     | 11        | 0         | 0         | 64555002       | 8590501  | 45820     | 11        | 0         | 0         |
| PASS cons              | 61639107           | 8302610  | 45296     | 11        | 0         | 0         | 62249886       | 8347417  | 45362     | 11        | 0         | 0         |
| ReadsMap               | 53673659           | 14854263 | 649065    | 12091     | 143       | 0         | 61876899       | 16658795 | 776727    | 13173     | 159       | 0         |
| SMALT                  | 74549890           | 2520940  | 0         | 0         | 0         | 0         | 74761393       | 2520940  | 0         | 0         | 0         | 0         |
| STAR 1-pass            | 68751704           | 8161114  | 74265     | 83        | 0         | 0         | 73570492       | 8673633  | 80486     | 85        | 0         | 0         |
| STAR 1-pass ann        | 64558922           | 12434337 | 369404    | 5882      | 83        | 0         | 69221948       | 13312964 | 417012    | 6571      | 85        | 0         |
| STAR 2-pass            | 64293445           | 12714005 | 401107    | 6073      | 70        | 0         | 69034173       | 13549823 | 460189    | 7024      | 79        | 0         |
| STAR 2-pass ann        | 64051280           | 12942089 | 419355    | 6527      | 79        | 0         | 68779769       | 14066697 | 497348    | 7696      | 88        | 0         |
| TopHat1                | 57899907           | 10586748 | 382874    | 4434      | 1         | 0         | 60653984       | 10893767 | 425260    | 5195      | 2         | 0         |
| TopHat1 ann            | 57893669           | 10914044 | 412454    | 5855      | 44        | 0         | 60648703       | 11232934 | 458045    | 6815      | 47        | 0         |
| TopHat2                | 52071715           | 9893020  | 370824    | 4710      | 8         | 0         | 56467249       | 10487685 | 397883    | 4826      | 8         | 0         |
| TopHat2 ann            | 51775131           | 11460488 | 470507    | 8668      | 155       | 0         | 55456172       | 12423060 | 552738    | 9462      | 180       | 0         |

There were no alignments with more than five introns.

**Supplementary Table 11.** Accuracy of multi-intron alignments.

|                           | Recall      |             |             |             |             | Precision   |             |             |             |             |
|---------------------------|-------------|-------------|-------------|-------------|-------------|-------------|-------------|-------------|-------------|-------------|
|                           | ≥ 1 introns | ≥ 2 introns | ≥ 3 introns | ≥ 4 introns | ≥ 5 introns | ≥ 1 introns | ≥ 2 introns | ≥ 3 introns | ≥ 4 introns | ≥ 5 introns |
| <b>A. Simulation 1</b>    |             |             |             |             |             |             |             |             |             |             |
| BAGET ann                 | 39.5%       | 0.0%        | 0.0%        | 0.0%        | 0.0%        | 78.7%       | n.a.        | n.a.        | n.a.        | n.a.        |
| GEM ann                   | 82.2%       | 65.2%       | 15.8%       | 0.0%        | 0.0%        | 98.6%       | 98.3%       | 97.6%       | n.a.        | n.a.        |
| GEM cons                  | 81.6%       | 59.7%       | 2.3%        | 0.0%        | 0.0%        | 98.9%       | 98.7%       | 97.5%       | n.a.        | n.a.        |
| GEM cons ann              | 82.0%       | 64.6%       | 14.8%       | 0.0%        | 0.0%        | 98.7%       | 98.5%       | 98.8%       | n.a.        | n.a.        |
| GSNAP                     | 73.6%       | 29.1%       | 11.4%       | 3.1%        | 0.0%        | 98.8%       | 95.7%       | 68.5%       | 89.5%       | n.a.        |
| GSNAP ann                 | 94.9%       | 82.2%       | 67.6%       | 34.2%       | 0.0%        | 98.7%       | 96.5%       | 95.9%       | 96.9%       | n.a.        |
| GSTRUCT                   | 94.1%       | 83.9%       | 65.8%       | 30.7%       | 0.0%        | 98.7%       | 97.5%       | 97.1%       | 97.1%       | n.a.        |
| GSTRUCT ann               | 95.6%       | 85.2%       | 66.2%       | 30.7%       | 0.0%        | 98.9%       | 97.5%       | 95.3%       | 97.1%       | n.a.        |
| MapSplice                 | 90.3%       | 72.5%       | 17.9%       | 1.3%        | 0.0%        | 99.3%       | 97.8%       | 97.7%       | 100.0%      | n.a.        |
| MapSplice ann             | 90.0%       | 74.1%       | 19.2%       | 1.3%        | 0.0%        | 97.7%       | 96.4%       | 93.0%       | 87.5%       | n.a.        |
| PALMapper                 | 85.4%       | 24.4%       | 0.1%        | 0.0%        | 0.0%        | 91.8%       | 70.4%       | 19.5%       | 0.0%        | n.a.        |
| PALMapper ann             | 87.2%       | 36.5%       | 0.1%        | 0.0%        | 0.0%        | 90.3%       | 78.3%       | 20.6%       | 0.0%        | n.a.        |
| PALMapper cons            | 45.0%       | 2.8%        | 0.0%        | 0.0%        | 0.0%        | 98.0%       | 98.2%       | n.a.        | n.a.        | n.a.        |
| PALMapper cons ann        | 78.6%       | 28.7%       | 0.1%        | 0.0%        | 0.0%        | 93.4%       | 95.7%       | 80.0%       | n.a.        | n.a.        |
| PASS                      | 66.7%       | 11.3%       | 0.2%        | 0.0%        | 0.0%        | 97.0%       | 96.7%       | 100.0%      | n.a.        | n.a.        |
| PASS cons                 | 66.6%       | 11.2%       | 0.2%        | 0.0%        | 0.0%        | 97.5%       | 96.8%       | 100.0%      | n.a.        | n.a.        |
| ReadsMap                  | 89.7%       | 82.7%       | 72.1%       | 40.8%       | 0.0%        | 77.8%       | 31.8%       | 7.0%        | 4.6%        | 0.0%        |
| SMALT                     | 6.2%        | 0.0%        | 0.0%        | 0.0%        | 0.0%        | 33.5%       | n.a.        | n.a.        | n.a.        | n.a.        |
| STAR 1-pass               | 65.4%       | 19.0%       | 2.8%        | 0.0%        | 0.0%        | 99.0%       | 99.0%       | 99.4%       | n.a.        | n.a.        |
| STAR 1-pass ann           | 90.7%       | 71.9%       | 64.7%       | 40.2%       | 0.0%        | 97.8%       | 95.4%       | 91.3%       | 96.5%       | n.a.        |
| STAR 2-pass               | 92.6%       | 76.8%       | 70.7%       | 38.2%       | 0.0%        | 98.6%       | 97.3%       | 97.2%       | 100.0%      | n.a.        |
| STAR 2-pass ann           | 93.0%       | 78.4%       | 72.4%       | 40.0%       | 0.0%        | 98.1%       | 96.7%       | 95.6%       | 99.5%       | n.a.        |
| TopHat1                   | 80.0%       | 67.4%       | 47.6%       | 7.5%        | 0.0%        | 98.0%       | 91.4%       | 89.2%       | 100.0%      | n.a.        |
| TopHat1 ann               | 80.6%       | 70.2%       | 54.3%       | 21.6%       | 0.0%        | 97.8%       | 90.7%       | 89.4%       | 83.1%       | n.a.        |
| TopHat2                   | 86.0%       | 78.3%       | 60.9%       | 8.2%        | 0.0%        | 98.2%       | 97.4%       | 98.2%       | 100.0%      | n.a.        |
| TopHat2 ann               | 92.3%       | 87.4%       | 79.3%       | 52.7%       | 0.0%        | 97.7%       | 94.5%       | 92.4%       | 98.6%       | n.a.        |
| Number of simulated reads | 13808336    | 598297      | 11781       | 493         | 54          |             |             |             |             |             |
| <b>B. Simulation 2</b>    |             |             |             |             |             |             |             |             |             |             |
| BAGET ann                 | 37.9%       | 0.0%        | 0.0%        | 0.0%        | 0.0%        | 80.5%       | n.a.        | n.a.        | n.a.        | n.a.        |
| GEM ann                   | 70.7%       | 50.8%       | 13.8%       | 0.0%        | 0.0%        | 97.4%       | 94.5%       | 86.4%       | 0.0%        | n.a.        |
| GEM cons                  | 69.4%       | 45.2%       | 2.9%        | 0.0%        | 0.0%        | 97.8%       | 95.4%       | 82.2%       | n.a.        | n.a.        |
| GEM cons ann              | 70.5%       | 50.2%       | 13.2%       | 0.0%        | 0.0%        | 97.7%       | 95.1%       | 94.3%       | 0.0%        | n.a.        |
| GSNAP                     | 68.3%       | 24.2%       | 9.1%        | 4.0%        | 0.0%        | 98.0%       | 89.1%       | 84.9%       | 84.6%       | n.a.        |
| GSNAP ann                 | 91.0%       | 76.4%       | 56.1%       | 33.0%       | 0.0%        | 98.0%       | 93.2%       | 89.5%       | 85.7%       | 0.0%        |
| GSTRUCT                   | 90.3%       | 78.4%       | 53.1%       | 18.3%       | 0.0%        | 97.8%       | 96.5%       | 95.7%       | 78.1%       | 0.0%        |
| GSTRUCT ann               | 91.8%       | 80.0%       | 56.6%       | 29.7%       | 0.0%        | 98.2%       | 96.6%       | 95.9%       | 83.5%       | 0.0%        |
| MapSplice                 | 73.8%       | 51.1%       | 15.2%       | 2.2%        | 0.0%        | 98.2%       | 92.0%       | 94.1%       | 100.0%      | n.a.        |
| MapSplice ann             | 74.3%       | 51.2%       | 17.6%       | 0.7%        | 0.0%        | 95.9%       | 90.0%       | 90.5%       | 14.3%       | n.a.        |
| PALMapper                 | 79.0%       | 17.1%       | 0.0%        | 0.0%        | 0.0%        | 87.7%       | 60.2%       | 10.0%       | 0.0%        | n.a.        |
| PALMapper ann             | 82.7%       | 28.3%       | 0.0%        | 0.0%        | 0.0%        | 85.9%       | 65.9%       | 10.6%       | 0.0%        | n.a.        |
| PALMapper cons            | 43.5%       | 3.0%        | 0.0%        | 0.0%        | 0.0%        | 95.7%       | 97.1%       | n.a.        | n.a.        | n.a.        |
| PALMapper cons ann        | 72.4%       | 22.0%       | 0.0%        | 0.0%        | 0.0%        | 89.6%       | 88.8%       | 66.7%       | n.a.        | n.a.        |
| PASS                      | 50.8%       | 6.6%        | 0.1%        | 0.0%        | 0.0%        | 93.3%       | 93.9%       | 100.0%      | n.a.        | n.a.        |
| PASS cons                 | 50.4%       | 6.6%        | 0.1%        | 0.0%        | 0.0%        | 94.5%       | 94.2%       | 100.0%      | n.a.        | n.a.        |
| ReadsMap                  | 76.2%       | 67.8%       | 56.3%       | 30.8%       | 0.0%        | 76.6%       | 65.1%       | 55.1%       | 58.7%       | n.a.        |
| SMALT                     | 5.2%        | 0.0%        | 0.0%        | 0.0%        | 0.0%        | 32.1%       | n.a.        | n.a.        | n.a.        | n.a.        |
| STAR 1-pass               | 51.8%       | 11.3%       | 0.7%        | 0.0%        | 0.0%        | 98.1%       | 96.3%       | 94.0%       | n.a.        | n.a.        |
| STAR 1-pass ann           | 79.3%       | 54.1%       | 44.3%       | 28.2%       | 0.0%        | 96.6%       | 91.8%       | 91.3%       | 92.8%       | n.a.        |
| STAR 2-pass               | 81.8%       | 59.9%       | 47.7%       | 25.6%       | 0.0%        | 97.3%       | 93.5%       | 93.0%       | 100.0%      | n.a.        |
| STAR 2-pass ann           | 83.1%       | 61.8%       | 48.5%       | 28.9%       | 0.0%        | 96.9%       | 92.4%       | 90.1%       | 100.0%      | n.a.        |
| TopHat1                   | 68.3%       | 54.9%       | 32.8%       | 0.0%        | 0.0%        | 97.0%       | 89.9%       | 88.6%       | 0.0%        | n.a.        |
| TopHat1 ann               | 70.5%       | 58.8%       | 44.0%       | 14.7%       | 0.0%        | 97.0%       | 89.3%       | 89.3%       | 90.9%       | n.a.        |
| TopHat2                   | 64.0%       | 56.6%       | 37.7%       | 0.0%        | 0.0%        | 97.2%       | 95.7%       | 95.7%       | 0.0%        | n.a.        |
| TopHat2 ann               | 73.8%       | 68.7%       | 64.0%       | 40.3%       | 0.0%        | 96.5%       | 91.4%       | 88.8%       | 71.0%       | n.a.        |
| Number of simulated reads | 14962090    | 622980      | 11701       | 270         | 3           |             |             |             |             |             |

For each intron count  $n$ , the tabulated percentages were computed as follows:

recall = number of primary alignments with at least  $n$  correctly identified introns / number of simulated reads with at least  $n$  introns;

precision = number of primary alignments with at least  $n$  correctly identified introns / number of primary alignments with at least  $n$  reported introns.

The number of simulated reads with  $n$  introns is given on the last row of each table. Precision is n.a. (not applicable) where no alignments were reported.

**Supplementary Table 12.** Transcript reconstruction accuracy.

|                        | Exon recall |       |       | Exon precision |       |       | Spliced transcript recall |       |       | Spliced transcript precision |       |       |
|------------------------|-------------|-------|-------|----------------|-------|-------|---------------------------|-------|-------|------------------------------|-------|-------|
|                        | All         | Known | Novel | All            | Known | Novel | All                       | Known | Novel | All                          | Known | Novel |
| <b>A. Simulation 1</b> |             |       |       |                |       |       |                           |       |       |                              |       |       |
| BAGET ann              | 76.5%       | 81.6% | 6.5%  | 59.6%          | 59.5% | 0.8%  | 12.0%                     | 38.6% | 3.8%  | 25.4%                        | 20.5% | 7.7%  |
| GEM ann                | 81.8%       | 84.1% | 50.5% | 77.4%          | 76.7% | 12.3% | 15.5%                     | 39.6% | 8.1%  | 29.2%                        | 19.8% | 14.2% |
| GEM cons               | 74.0%       | 76.2% | 44.1% | 74.6%          | 73.9% | 10.4% | 12.7%                     | 31.8% | 6.8%  | 24.9%                        | 16.4% | 12.0% |
| GEM cons ann           | 81.1%       | 83.8% | 44.5% | 77.1%          | 76.5% | 10.9% | 15.3%                     | 40.3% | 7.6%  | 29.3%                        | 20.4% | 13.6% |
| GSNAP                  | 82.0%       | 84.1% | 54.2% | 78.9%          | 78.2% | 14.1% | 16.1%                     | 40.0% | 8.7%  | 30.4%                        | 20.3% | 15.4% |
| GSNAP ann              | 83.1%       | 85.3% | 53.3% | 82.3%          | 81.7% | 16.6% | 18.0%                     | 45.6% | 9.5%  | 35.9%                        | 25.0% | 18.5% |
| GSTRUCT                | 83.0%       | 85.0% | 55.7% | 81.5%          | 80.8% | 16.4% | 17.7%                     | 43.7% | 9.7%  | 34.9%                        | 23.7% | 18.4% |
| GSTRUCT ann            | 83.2%       | 85.3% | 55.2% | 82.2%          | 81.5% | 16.9% | 18.0%                     | 44.8% | 9.8%  | 35.6%                        | 24.4% | 18.7% |
| MapSplice              | 81.3%       | 83.3% | 54.0% | 80.5%          | 79.8% | 15.4% | 16.1%                     | 40.0% | 8.8%  | 32.6%                        | 22.0% | 16.8% |
| MapSplice ann          | 82.0%       | 84.5% | 47.6% | 80.7%          | 80.1% | 13.9% | 16.3%                     | 42.5% | 8.3%  | 33.3%                        | 23.4% | 16.3% |
| PALMapper              | 82.5%       | 84.6% | 54.0% | 66.2%          | 65.2% | 7.8%  | 15.0%                     | 37.1% | 8.3%  | 28.0%                        | 18.4% | 14.1% |
| PALMapper ann          | 83.1%       | 85.3% | 53.7% | 66.3%          | 65.3% | 7.7%  | 14.3%                     | 35.5% | 7.8%  | 26.5%                        | 17.4% | 13.1% |
| PALMapper cons         | 78.2%       | 80.4% | 47.2% | 59.2%          | 58.2% | 5.5%  | 13.2%                     | 32.2% | 7.3%  | 25.2%                        | 16.2% | 12.6% |
| PALMapper cons ann     | 80.6%       | 82.7% | 50.7% | 64.0%          | 63.0% | 6.9%  | 15.5%                     | 38.3% | 8.5%  | 31.4%                        | 20.9% | 16.2% |
| PASS                   | 64.3%       | 66.3% | 36.5% | 41.6%          | 40.7% | 2.6%  | 9.3%                      | 23.5% | 4.9%  | 14.1%                        | 8.9%  | 6.3%  |
| PASS cons              | 64.6%       | 66.6% | 37.0% | 42.5%          | 41.6% | 2.8%  | 9.3%                      | 23.4% | 5.0%  | 14.3%                        | 9.0%  | 6.4%  |
| ReadsMap               | 72.6%       | 74.5% | 46.7% | 54.1%          | 53.0% | 4.8%  | 13.0%                     | 31.4% | 7.3%  | 21.7%                        | 13.6% | 10.7% |
| SMALT                  | 21.6%       | 22.2% | 14.3% | 21.9%          | 21.2% | 1.1%  | 1.0%                      | 2.0%  | 0.6%  | 1.7%                         | 0.9%  | 0.9%  |
| STAR 1-pass            | 80.3%       | 82.3% | 53.3% | 77.1%          | 76.3% | 12.9% | 14.4%                     | 36.2% | 7.8%  | 26.2%                        | 17.3% | 12.7% |
| STAR 1-pass ann        | 83.9%       | 86.2% | 52.8% | 79.9%          | 79.2% | 14.3% | 17.8%                     | 46.4% | 9.0%  | 34.6%                        | 24.4% | 17.0% |
| STAR 2-pass            | 82.4%       | 84.3% | 55.7% | 80.0%          | 79.2% | 15.3% | 16.8%                     | 41.5% | 9.2%  | 32.1%                        | 21.5% | 16.6% |
| STAR 2-pass ann        | 84.1%       | 86.2% | 55.1% | 80.0%          | 79.3% | 14.9% | 17.6%                     | 44.8% | 9.2%  | 33.5%                        | 23.2% | 16.9% |
| TopHat1                | 77.6%       | 79.8% | 46.9% | 78.0%          | 77.3% | 12.4% | 14.0%                     | 35.4% | 7.4%  | 27.0%                        | 18.0% | 13.0% |
| TopHat1 ann            | 81.4%       | 83.9% | 47.0% | 79.8%          | 79.2% | 13.2% | 16.2%                     | 42.4% | 8.2%  | 31.6%                        | 22.1% | 15.2% |
| TopHat2                | 78.7%       | 80.9% | 47.7% | 81.3%          | 80.7% | 14.9% | 15.0%                     | 38.0% | 8.0%  | 30.9%                        | 20.9% | 15.4% |
| TopHat2 ann            | 83.6%       | 86.3% | 46.5% | 83.4%          | 82.8% | 15.7% | 17.9%                     | 48.1% | 8.7%  | 37.4%                        | 27.3% | 18.1% |
| Truth                  | 86.0%       | 87.6% | 65.2% | 85.7%          | 85.1% | 23.1% | 19.9%                     | 48.4% | 11.2% | 40.0%                        | 27.5% | 22.3% |
| <b>B. Simulation 2</b> |             |       |       |                |       |       |                           |       |       |                              |       |       |
| BAGET ann              | 76.5%       | 81.7% | 7.3%  | 56.8%          | 56.7% | 0.7%  | 12.0%                     | 38.2% | 3.7%  | 24.7%                        | 20.0% | 7.2%  |
| GEM ann                | 74.0%       | 76.4% | 42.4% | 66.6%          | 65.8% | 7.0%  | 9.0%                      | 21.0% | 5.2%  | 14.6%                        | 8.8%  | 7.0%  |
| GEM cons               | 64.1%       | 66.2% | 36.4% | 62.4%          | 61.5% | 5.8%  | 6.7%                      | 14.3% | 4.3%  | 11.1%                        | 6.0%  | 5.8%  |
| GEM cons ann           | 73.5%       | 76.2% | 36.7% | 66.2%          | 65.5% | 6.1%  | 8.8%                      | 21.7% | 4.8%  | 14.5%                        | 9.0%  | 6.6%  |
| GSNAP                  | 80.4%       | 82.6% | 50.4% | 70.9%          | 70.0% | 9.2%  | 12.7%                     | 30.1% | 7.3%  | 21.0%                        | 13.0% | 10.4% |
| GSNAP ann              | 81.9%       | 84.3% | 49.7% | 76.2%          | 75.5% | 11.5% | 15.0%                     | 36.5% | 8.3%  | 26.1%                        | 16.9% | 12.9% |
| GSTRUCT                | 81.6%       | 83.8% | 52.2% | 75.6%          | 74.8% | 11.7% | 14.9%                     | 35.1% | 8.6%  | 25.6%                        | 16.1% | 13.1% |
| GSTRUCT ann            | 82.2%       | 84.5% | 52.1% | 76.1%          | 75.3% | 11.9% | 15.3%                     | 35.9% | 8.9%  | 26.2%                        | 16.5% | 13.5% |
| MapSplice              | 71.2%       | 73.3% | 43.5% | 70.0%          | 69.1% | 8.7%  | 10.5%                     | 24.1% | 6.3%  | 19.1%                        | 11.4% | 9.7%  |
| MapSplice ann          | 73.5%       | 76.1% | 37.8% | 71.4%          | 70.7% | 7.8%  | 11.2%                     | 27.1% | 6.2%  | 20.5%                        | 13.0% | 9.8%  |
| PALMapper              | 79.4%       | 81.7% | 49.2% | 61.0%          | 60.0% | 6.0%  | 12.0%                     | 28.3% | 6.9%  | 20.2%                        | 12.5% | 10.0% |
| PALMapper ann          | 80.6%       | 82.9% | 49.1% | 62.3%          | 61.4% | 6.2%  | 11.4%                     | 27.8% | 6.2%  | 19.6%                        | 12.4% | 9.2%  |
| PALMapper cons         | 75.2%       | 77.7% | 43.0% | 55.0%          | 54.0% | 4.4%  | 10.9%                     | 25.0% | 6.5%  | 19.9%                        | 12.0% | 10.1% |
| PALMapper cons ann     | 77.4%       | 79.9% | 45.1% | 59.4%          | 58.5% | 5.4%  | 12.9%                     | 30.9% | 7.3%  | 25.1%                        | 16.1% | 12.6% |
| PASS                   | 45.6%       | 47.1% | 25.8% | 34.4%          | 33.5% | 2.0%  | 4.3%                      | 9.7%  | 2.6%  | 6.5%                         | 3.6%  | 3.1%  |
| PASS cons              | 46.0%       | 47.5% | 26.3% | 35.1%          | 34.2% | 2.1%  | 4.3%                      | 9.7%  | 2.6%  | 6.5%                         | 3.6%  | 3.1%  |
| ReadsMap               | 67.4%       | 69.3% | 42.7% | 39.5%          | 38.4% | 2.7%  | 9.3%                      | 21.1% | 5.7%  | 11.0%                        | 6.2%  | 5.4%  |
| SMALT                  | 20.7%       | 21.2% | 14.0% | 20.8%          | 20.2% | 1.0%  | 0.9%                      | 1.6%  | 0.7%  | 1.7%                         | 0.7%  | 1.0%  |
| STAR 1-pass            | 71.7%       | 73.8% | 44.5% | 67.2%          | 66.3% | 7.7%  | 9.5%                      | 21.1% | 5.8%  | 15.0%                        | 8.6%  | 7.7%  |
| STAR 1-pass ann        | 80.8%       | 83.4% | 45.3% | 73.1%          | 72.4% | 9.1%  | 14.4%                     | 37.1% | 7.3%  | 24.6%                        | 16.7% | 11.2% |
| STAR 2-pass            | 76.9%       | 79.1% | 48.1% | 71.9%          | 71.0% | 9.6%  | 12.2%                     | 28.3% | 7.1%  | 20.5%                        | 12.5% | 10.3% |
| STAR 2-pass ann        | 80.5%       | 82.9% | 48.4% | 73.3%          | 72.5% | 9.9%  | 13.7%                     | 33.4% | 7.6%  | 23.2%                        | 14.9% | 11.2% |
| TopHat1                | 69.6%       | 71.7% | 41.4% | 70.1%          | 69.3% | 8.5%  | 9.7%                      | 21.5% | 6.1%  | 16.2%                        | 9.2%  | 8.4%  |
| TopHat1 ann            | 76.9%       | 79.5% | 42.1% | 74.8%          | 74.1% | 9.8%  | 12.8%                     | 31.5% | 7.0%  | 22.1%                        | 14.2% | 10.5% |
| TopHat2                | 72.6%       | 74.9% | 42.3% | 74.1%          | 73.4% | 10.0% | 11.1%                     | 25.2% | 6.7%  | 19.6%                        | 11.6% | 10.1% |
| TopHat2 ann            | 82.1%       | 85.1% | 41.9% | 79.9%          | 79.4% | 12.0% | 16.0%                     | 41.7% | 8.0%  | 30.1%                        | 21.1% | 14.1% |
| Truth                  | 85.9%       | 87.5% | 63.6% | 84.2%          | 83.6% | 20.8% | 18.2%                     | 41.4% | 11.0% | 31.9%                        | 20.2% | 17.7% |

The exons and transcripts constituting the simulated transcriptomes were classified as known or novel, depending whether they were included in the annotation provided to aligners. Note that lower accuracy for novel transcripts is expected even for protocols not using annotation, as the expression levels are lower for novel transcripts on average.

The precision estimates for known and novel features serve to assess the effect on precision when excluding a defined subset of matches. Precision for known features was computed as  $TP_{\text{known}} / (TP_{\text{known}} + FP)$ , i.e. by excluding predictions matching novel transcripts. Similarly, precision for novel features was computed as  $TP_{\text{novel}} / (TP_{\text{novel}} + FP)$ . These values should not be interpreted as absolute precision estimates, but in a relative manner, for comparison among methods.



|                    | Junction type | Incorporated | Discarded | Percent incorporated | Percent incorporated, stratified by number of mappings supporting junction |       |       |       |       |       |       |       |       |       |
|--------------------|---------------|--------------|-----------|----------------------|----------------------------------------------------------------------------|-------|-------|-------|-------|-------|-------|-------|-------|-------|
|                    |               |              |           |                      | 1                                                                          | 2     | 3     | 4     | 5     | 6     | 7     | 8     | 9     | 10+   |
| PALMapper cons     | True          | 79183        | 24754     | 76.2%                | 31.1%                                                                      | 44.0% | 53.6% | 57.8% | 59.7% | 63.1% | 63.8% | 66.6% | 66.8% | 83.3% |
|                    | False         | 3811         | 8450      | 31.1%                | 9.9%                                                                       | 17.0% | 23.3% | 27.1% | 29.6% | 36.3% | 39.1% | 39.8% | 37.5% | 52.0% |
| PALMapper cons ann | True          | 79606        | 26282     | 75.2%                | 21.3%                                                                      | 25.8% | 35.8% | 47.3% | 55.0% | 59.6% | 60.7% | 61.1% | 64.8% | 79.5% |
|                    | False         | 5166         | 53953     | 8.7%                 | 3.0%                                                                       | 4.8%  | 6.5%  | 7.5%  | 9.3%  | 9.7%  | 9.7%  | 9.9%  | 11.1% | 16.3% |
| PASS               | True          | 55961        | 51872     | 51.9%                | 9.6%                                                                       | 19.0% | 26.6% | 30.9% | 34.9% | 36.4% | 39.0% | 40.3% | 43.0% | 63.4% |
|                    | False         | 2383         | 122909    | 1.9%                 | 0.4%                                                                       | 1.2%  | 2.5%  | 3.6%  | 4.9%  | 5.6%  | 6.9%  | 8.2%  | 7.7%  | 18.1% |
| PASS cons          | True          | 56849        | 50709     | 52.9%                | 9.9%                                                                       | 19.3% | 26.2% | 31.4% | 35.7% | 38.0% | 39.8% | 41.7% | 43.7% | 64.6% |
|                    | False         | 2186         | 75177     | 2.8%                 | 0.5%                                                                       | 1.6%  | 2.9%  | 4.9%  | 6.0%  | 6.0%  | 8.5%  | 8.8%  | 9.3%  | 20.0% |
| ReadsMap           | True          | 72489        | 36558     | 66.5%                | 16.1%                                                                      | 31.2% | 42.3% | 44.5% | 48.9% | 48.5% | 50.5% | 51.6% | 53.4% | 73.5% |
|                    | False         | 16565        | 926119    | 1.8%                 | 0.1%                                                                       | 0.4%  | 0.7%  | 1.1%  | 1.7%  | 2.5%  | 3.3%  | 4.3%  | 5.9%  | 19.6% |
| SMALT              | True          | 23924        | 26802     | 47.2%                | 27.9%                                                                      | 37.7% | 41.7% | 45.9% | 47.6% | 48.0% | 50.6% | 51.6% | 50.4% | 61.6% |
|                    | False         | 53865        | 127976    | 29.6%                | 10.9%                                                                      | 25.0% | 34.5% | 39.1% | 43.3% | 45.8% | 47.5% | 49.2% | 49.6% | 56.8% |
| STAR 1-pass        | True          | 75728        | 34573     | 68.7%                | 23.4%                                                                      | 39.2% | 48.4% | 51.6% | 55.1% | 59.1% | 60.0% | 63.2% | 62.0% | 78.6% |
|                    | False         | 1880         | 13013     | 12.6%                | 3.0%                                                                       | 10.6% | 15.3% | 24.7% | 22.8% | 29.7% | 37.1% | 32.1% | 44.2% | 59.1% |
| STAR 1-pass ann    | True          | 81935        | 34836     | 70.2%                | 17.3%                                                                      | 30.0% | 39.3% | 44.9% | 49.7% | 51.0% | 54.7% | 55.7% | 57.0% | 81.5% |
|                    | False         | 2504         | 29192     | 7.9%                 | 2.4%                                                                       | 6.1%  | 8.7%  | 11.3% | 9.4%  | 12.5% | 11.5% | 16.8% | 13.5% | 35.1% |
| STAR 2-pass        | True          | 81369        | 31663     | 72.0%                | 17.2%                                                                      | 31.9% | 41.8% | 49.3% | 54.6% | 55.2% | 59.2% | 58.9% | 61.1% | 79.8% |
|                    | False         | 1687         | 21062     | 7.4%                 | 1.8%                                                                       | 5.6%  | 8.1%  | 11.1% | 13.0% | 13.5% | 14.7% | 16.9% | 11.5% | 31.1% |
| STAR 2-pass ann    | True          | 84855        | 32289     | 72.4%                | 19.4%                                                                      | 34.0% | 45.0% | 51.5% | 56.0% | 56.5% | 59.2% | 59.6% | 63.1% | 80.5% |
|                    | False         | 2254         | 30601     | 6.9%                 | 1.8%                                                                       | 4.7%  | 7.0%  | 9.7%  | 8.6%  | 10.2% | 10.7% | 16.7% | 12.3% | 28.9% |
| TopHat1            | True          | 74198        | 27192     | 73.2%                | 19.1%                                                                      | 36.7% | 46.1% | 53.2% | 57.3% | 61.4% | 61.3% | 62.0% | 63.4% | 79.3% |
|                    | False         | 1647         | 9737      | 14.5%                | 3.0%                                                                       | 5.9%  | 8.8%  | 11.6% | 13.7% | 16.0% | 17.3% | 15.9% | 17.7% | 32.1% |
| TopHat1 ann        | True          | 81143        | 27776     | 74.5%                | 25.6%                                                                      | 45.2% | 53.6% | 59.0% | 60.9% | 63.0% | 64.2% | 64.7% | 65.2% | 81.0% |
|                    | False         | 1723         | 10552     | 14.0%                | 3.5%                                                                       | 6.5%  | 7.6%  | 11.2% | 14.0% | 12.7% | 18.4% | 15.8% | 17.5% | 30.2% |
| TopHat2            | True          | 76693        | 27580     | 73.6%                | 21.2%                                                                      | 35.8% | 48.9% | 53.7% | 57.1% | 59.4% | 60.7% | 61.3% | 62.3% | 80.2% |
|                    | False         | 552          | 9016      | 5.8%                 | 2.1%                                                                       | 2.9%  | 4.8%  | 4.8%  | 4.8%  | 5.2%  | 10.1% | 6.6%  | 9.5%  | 9.5%  |
| TopHat2 ann        | True          | 84919        | 28645     | 74.8%                | 25.6%                                                                      | 43.0% | 52.2% | 57.4% | 59.9% | 59.5% | 61.9% | 61.0% | 65.2% | 81.9% |
|                    | False         | 1494         | 24895     | 5.7%                 | 4.1%                                                                       | 4.3%  | 5.8%  | 6.5%  | 4.9%  | 5.6%  | 7.5%  | 6.9%  | 5.3%  | 9.6%  |
| Truth              | True          | 92247        | 31334     | 74.6%                | 21.1%                                                                      | 39.2% | 52.1% | 55.1% | 59.4% | 61.2% | 62.0% | 64.4% | 64.0% | 82.1% |
|                    | False         | 0            | 0         | n.a.                 | n.a.                                                                       | n.a.  | n.a.  | n.a.  | n.a.  | n.a.  | n.a.  | n.a.  | n.a.  | n.a.  |

Number and percentage of exon junctions incorporated into transcript isoforms by Cufflinks. The junctions counted are those present in primary alignments, which were used as input to Cufflinks. Junctions are further classified as true and false by comparison to the simulated gene models. n.a., not applicable.

## Supplementary Note

This part of the supplement describes the evaluated alignment protocols, the evaluation metrics, and additional results from analysis of read placement in relation to annotated genes.

### Alignment protocols

Each of the sections 1–11 below describes an alignment program or pipeline. For parameter variations based on a common aligner, subheadings designate the individual protocols.

Each protocol made use of genome sequences for human assembly GRCh37 and mouse assembly MGSCv37, as provided at the UCSC Genome Browser website (<http://genome.ucsc.edu>) in FASTA format (hg19.fa and mm9.fa). The aligners require indices built from the genome FASTA files, as detailed below or in the documentation for the individual programs. These indices are specific to each aligner, but only need to be created once and can be reused for all alignment jobs to the same genome.

Some protocols also made use of gene annotation for the human and mouse genomes. The annotation was obtained in GTF format from Ensembl version 62 (<http://www.ensembl.org>) and adapted so that reference sequence coordinates corresponded to the genome sequence files from UCSC, using clone fragment and contig information to match the Ensembl and UCSC representations of the genome assemblies.

#### 1. BAGET

An unreleased version of the BAGET pipeline was used. The earlier version 1.0 is available at <http://icb.med.cornell.edu/wiki/index.php/BAGET> along with a tutorial. BAGET has now been integrated into the r-make tool set (<http://physiology.med.cornell.edu/faculty/mason/lab/r-make>).

Briefly, BAGET first runs the short read aligner BWA<sup>1</sup> to align the input reads to the genome. Reads that were not aligned in this step are then searched against an index of known exon junctions, also using BWA. Any reads that remain unaligned are scanned for poly(A) tails. After trimming such tails, BAGET attempts to align the reads to the genome again, as above. BWA does not perform spliced alignment, and BAGET therefore relies on the index of known exon junctions to find spliced alignments.

#### 2. GEM

The GEM suite comprises several alignment tools, including the GEM contiguous mapper<sup>2</sup> and the GEM splice mapper, that can be combined for RNA-seq analysis. The development snapshot 1.358 was used for this evaluation. Several versions of GEM are available from <http://gemlibrary.sourceforge.net>.

The workflow applied here implements a progressive alignment scheme where reads are mapped in stages. In the first stage, the GEM contiguous mapper is used to map the entire read. Reads for which a high-quality contiguous alignment are not found are passed to the GEM splice mapper. If a match is not found, a second iteration of contiguous/spliced alignment is attempted after trimming five nucleotides from the 5' end of the read and 20 from the 3' end. GEM was applied in three different pipeline configurations that differ in the set of junctions considered for spliced alignment, as outlined below.

##### 2.1. GEM ann

In this protocol, GEM first carries out a *de novo* splice junction discovery step by aligning reads against the genome. This is followed by a second step, where spliced alignments are determined using the set of *de novo* junctions from the first step together with known junctions from the supplied annotation.

##### 2.2. GEM cons

Alignment is carried out as above, but with a conservative subset of *de novo* junctions and without making use of annotation.

##### 2.3. GEM cons ann

As above, but using the conservative subset of *de novo* junctions together with annotated junctions.

### 3. GSNAP

GSNAP version 2011-08-15 was used<sup>3</sup>. This version can be obtained from <http://research-pub.gene.com/gmap>.

#### 3.1 GSNAP

In this basic protocol, GSNAP was used without annotation. The following option string was specified for each data set:

```
-B 5 -a paired -N 1 -m 4 -M 1 -i 2 -w 200000 -E 4 -n 100 --pairmax-rna=200000  
--gmap-mode=pairsearch,terminal,improve -A sam -O
```

In addition, options `-d`, `--quality-protocol`, `-q` and `-t` and were set as appropriate for each alignment job to specify genome database, quality scale of input data and settings for parallel computing.

#### 3.2 GSNAP ann

GSNAP was executed as above, with the additional option `-s` to supply an index of known splice sites.

### 4. GSTRUCT

GSTRUCT is a pipeline that makes use of GSNAP as its alignment component. Version 2011-08-15 was used here. The pipeline is not yet available, but a public release is expected soon. Briefly, GSTRUCT considers read alignments from GSNAP with a mapping quality score of 20 or greater, and creates three types of auxiliary information to be used for a re-alignment:

1. Splice sites: Splices found in the first iteration of GSNAP are filtered for consistency against the positive and negative gene extents in that region. These extents are the coverages over the paired-end lengths for paired-end reads that contain a predicted splice site.
2. SNPs: Variant genotypes are called from the first iteration of GSNAP and used with the SNP-tolerance feature of GSNAP in the second iteration.
3. Run lengths: The presence or absence of good alignments from the first iteration of GSNAP is recorded at each genomic position. When the second iteration of GSNAP cannot resolve a multi-mapping read, it prefers the one that overlaps a good alignment from the first iteration.

#### 4.1 GSTRUCT

GSTRUCT was applied on the results from running GSNAP without annotation (see 3.1).

#### 4.2 GSTRUCT ann

GSTRUCT was applied on the results from running GSNAP with splice site annotation (see 3.2).

### 5. MapSplice

An unreleased version of MapSplice<sup>4</sup> was used, internally called 8\_8. This version was based on the most recent MapSplice 1 release 1.15.2, available from <http://www.netlab.uky.edu/p/bioinfo>.

#### 5.1 MapSplice

This protocol corresponds to the standard method of running MapSplice and does not make use of gene annotation. MapSplice is designed to operate without annotation by default.

#### 5.2 MapSplice ann

This protocol made use of gene annotation by running MapSplice with increased sensitivity (which would also cause it to detect more spurious junctions), followed by post-processing to filter out splice junctions with low read support that were not present in the annotation.



## 6. PALMapper

PALMapper has been described<sup>5</sup> and its source code, tutorials and further information are available from <http://raetschlab.org/suppl/palmapper>. The program was used in a variant-aware alignment pipeline, where the RNA-seq data is first aligned to the genome in order to detect possible variations in the genome sequence. These genome variants are used in a final alignment run and serve to improve read placement. Additionally, information on splice junctions collected during the initial run or from gene annotation can be used to improve the final alignment run.

PALMapper was run in two stages. The initial stage, for the detection of variants and junctions, allowed up to six edit operations and imposed restrictions on anchor length of split reads (`-min-spliced-segment-len`) and edit operations in the vicinity of splice sites (`-QMM`). Variant calls and junction information were recorded for later use. At this initial stage PALMapper was run with the following parameters:

```
palmapper -M 6 -G 5 -E 6 -l 25 -L 30 -K 12 -C 35 -I 200000 -NI 1 -SA 100 -CT 50 -a -S -report-splice-sites 0.95 -filter-max-mismatches 0 -filter-max-gaps 0 -filter-splice-region 5 -polytrim 40 -min-spliced-segment-len 10 -QMM 7 -acc <ACCSPLICEPATH> -don <DONSPLICEPATH> -report-junctions <JUNCTIONSFILE> -qpalma-indel-penalty 5 -discover-variants -report-variants <VARIANTSFILE> -no-gap-end 10 -non-consensus-search -report-splice-sites-top-perc 0.01
```

A sensitive alignment regime was applied for the final alignments, allowing for up to 10 edit operations and a maximum of two splice junctions per read. As variant and junction information collected in the first run were used for this alignment, read truncation was not enabled; instead a higher number of edit operations was allowed, leading to a possible accumulation of mismatches and indels at the ends of reads. At this subsequent stage PALMapper was run with the following parameters:

```
palmapper -M 10 -G 2 -E 10 -l 20 -L 20 -K 12 -C 30 -I 20000 -NI 2 -SA 5 -CT 50 -a -S -filter-max-mismatches 0 -filter-max-gaps 0 -filter-splice-region 5 -junction-remapping <JUNCTIONSFILE> -score-annotated-splice-sites <JUNCTIONSFILE> -acc <ACCSPLICEPATH> -don <DONSPLICEPATH> -report-splice-sites-top-perc 0.005 -QMM 7 -use-variants <VARIANTSFILE> -max-dp-deletions 1 -use-variants-editop-filter
```

Three strategies were used to post-process the alignments:

1. Alignment filtering by the Simple Alignment Filter Tool (SAFT; <http://raetschlab.org/suppl/saft>), which filters all alignments based on the number of edit operations, and spliced alignments based on the number of reads supporting splice junctions and minimal segment length. These criteria were set as detailed in the table below.

| Protocol           | Data set     | Allowed edit operations | Junction-supporting reads required | Minimal segment length for spliced alignments |
|--------------------|--------------|-------------------------|------------------------------------|-----------------------------------------------|
| PALMapper cons     | K562         | 0                       | 3                                  | 18                                            |
| PALMapper cons     | Simulation 1 | 1                       | 3                                  | 18                                            |
| PALMapper cons     | Simulation 2 | 4                       | 5                                  | 18                                            |
| PALMapper cons ann | Simulation 1 | 6                       | 4                                  | 6                                             |
| PALMapper cons ann | Simulation 2 | 6                       | 6                                  | 6                                             |

2. Analysis and treatment of ambiguous read placement by the Multi-Mapper Resolution (MMR) Tool (<http://raetschlab.org/suppl/MMR>) to determine the best alignments for read pairs. This tool implements a strategy to select alignments by iteratively minimizing the variation of coverage in a window around the possible mapping locations. MMR options were set to “`-I 3 -F 1 -p -i 400000`” for K562 data and “`-I 2 -F 1 -p -i 400000`” for simulated data.

3. Alignment pair optimization to determine the best pairs of single-end alignments. This algorithm considers all proper pairs of alignments and iteratively selects pairs with maximal summed single-end alignment scores. The alignment score considers matches, mismatches, indels and base-call quality scores<sup>6</sup>. Multiple pairs were reported such that no single-end alignment was included in more than one pair.

There were four protocols evaluated based on PALMapper. Software versions were: PALMapper 0.4rc3, SAFT 0.1 and MMR 0.1.

### 6.1 PALMapper

Variant-aware alignment without annotation was followed by MMR.

### 6.2 PALMapper ann

Variant-aware alignment with annotation, followed by MMR.

### 6.3 PALMapper cons

This more conservative protocol comprises variant-aware alignment without annotation, followed by SAFT filtering and alignment pair optimization.

### 6.4 PALMapper cons ann

Variant-aware alignment with annotation followed by SAFT filtering and alignment pair optimization.

## 7. PASS

The PASS spliced alignment pipeline<sup>7</sup> version 1.64 was run in two different ways. Annotation was not used. PASS can be downloaded from <http://pass.cribi.unipd.it>.

### 7.1 PASS

Default parameters for Illumina data were used. With these settings, truncation of low-quality bases is enabled and the maximum number of allowed mismatches per mapping is fixed. Read truncation is based on a learning step that correlates the number of mapped reads with the base call quality scores of excluded bases.

### 7.2 PASS cons

Default parameters for Illumina data were used as above, except for the variable `SAM_REDUNDANCY_PAR`, which was set to add the options: `-unpaired_coverage 1 -unpaired_score 60`. These options serve to increase specificity by filtering out alignments at genomic regions of low coverage.

## 8. ReadsMap

The ReadsMap program is part of the Transomics pipeline from Softberry (<http://www.softberry.com>). ReadsMap production release 1.0 (internal version number 6.0.0) was applied with default parameters, without providing gene annotation or mate pair information. The default parameters are suitable for mapping reads with mismatches, but mapping reads with indels requires other options. Poor-quality tails were not truncated from reads and partial mappings were not reported.

Regions marked as repeats in the reference genome sequence were ignored, except for the first and last 30 bp of such regions. For this purpose, the masking information in the genome sequence from UCSC was used, where repeats correspond to elements identified by RepeatMasker or Tandem Repeats Finder (with a period of 12 or less). Most reads originating from such repeats were therefore not mapped.

## 9. SMALT

SMALT version 0.5.1 was used, and is available at <http://www.sanger.ac.uk/resources/software/smalt>.

The indices of the reference genomes were built with the following options:

```
smalt index -k 13 -s 7 hg19k13s7 hg19.fa
smalt index -k 13 -s 7 mm9k13s7 mm9.fa
```

All human reads were aligned with the following options:

```
smalt map -x -p -f samsoft -o mapped.sam hg19k13s7 mate1.fq mate2.fq
```

All mouse reads were aligned with the following options:

```
smalt map -x -p -f samsoft -o mapped.sam mm9k13s7 mate1.fq mate2.fq
```

Although SMALT does not perform spliced alignments, it can report up to two complementary alignments per read. This feature is activated with the `-p` option, which was used here. When two complementary alignments are reported, one will be labeled as secondary (see the SMALT manual). The SAM format output from SMALT was post-processed to merge compatible primary and secondary alignments of the same read into spliced alignments. Briefly, gaps between primary and secondary alignments were filled with intron (N) operations, and priority given to the primary alignment when the same part of the read was included in both alignments.

## 10. STAR

STAR version 1.9 was used<sup>8</sup>. Although this version has not been released, the more recent version 2.1.1 available from <http://code.google.com/p/rna-star/> only differs with regard to input/output formatting and minor bug fixes.

### 10.1 STAR 1-pass

In this most basic protocol, STAR was used in single-pass mode and without annotation. STAR uses genome index files that must be saved in unique directories. The human genome index was built from the FASTA file `hg19.fa` as follows:

```
genomeDir=/path/to/hg19
mkdir $genomeDir
STAR --runMode genomeGenerate --genomeDir $genomeDir --genomeFastaFiles hg19.fa \
--runThreadN <n>
```

The option `--runThreadN` should be set to specify the number of processor threads to use. The mouse genome index was built from `mm9.fa` using the same options. Alignment jobs were executed as follows:

```
runDir=/path/to/1pass
mkdir $runDir
cd $runDir
STAR --genomeDir $genomeDir --readFilesIn mate1.fq mate2.fq --runThreadN <n>
```

### 10.2 STAR 1-pass ann

In this protocol, STAR uses a splice junction database to improve accuracy. Splice junction coordinates are supplied at the index generation step in a tab-delimited file, as detailed in the STAR manual. The genome index was created as described under 10.1 above, with two additional options:

```
--sjdbFileChrStartEnd /path/to/junctions.txt --sjdbOverhang 75
```

Alignment jobs were then executed as follows:

```
runDir=/path/to/1pass_ann
mkdir $runDir
cd $runDir
STAR --genomeDir $genomeDir --readFilesIn mate1.fq mate2.fq --runThreadN <n>
```

### 10.3 STAR 2-pass

In the STAR 2-pass approach, splice junctions found in a first alignment run are used to guide the final alignment. The first pass is performed as described under 10.1 above. A new index is then created using splice junction information contained in the file `SJ.out.tab` from the first pass:

```
genomeDir=/path/to/hg19_2pass
mkdir $genomeDir
STAR --runMode genomeGenerate --genomeDir $genomeDir --genomeFastaFiles hg19.fa \
--sjdbFileChrStartEnd /path/to/1pass/SJ.out.tab --sjdbOverhang 75 --runThreadN <n>
```

The resulting index is then used to produce the final alignments as follows:

```
runDir=/path/to/2pass
mkdir $runDir
cd $runDir
STAR --genomeDir $genomeDir --readFilesIn mate1.fq mate2.fq --runThreadN <n>
```

#### 10.4 STAR 2-pass ann

In this version of the 2-pass protocol, annotated splice junctions are provided in the first alignment step. The first pass is therefore executed as described under 10.2 above. New index files are then created using splice junction information contained in the file SJ.out.tab from the first pass:

```
genomeDir=/path/to/hg19_2pass_ann
mkdir $genomeDir
STAR --runMode genomeGenerate --genomeDir $genomeDir --genomeFastaFiles hg19.fa \
--sjdbFileChrStartEnd /path/to/1pass_ann/SJ.out.tab --sjdbOverhang 75 --runThreadN <n>
```

The resulting index is then used to produce the final alignments as follows:

```
runDir=/path/to/2pass_ann
mkdir $runDir
cd $runDir
STAR --genomeDir $genomeDir --readFilesIn mate1.fq mate2.fq --runThreadN <n>
```

## 11. TopHat

The spliced alignment program TopHat<sup>9,10</sup> uses the short read aligner Bowtie<sup>11,12</sup> as its alignment engine. Two versions of TopHat and Bowtie were evaluated, both available from <http://tophat.cbcb.umd.edu>.

### 11.1 TopHat1

This protocol followed the recommendations in a recent publication by the TopHat developers<sup>13</sup>, using TopHat version 1.3.2 with default options, except for options specifying quality scale of input data, library type and number of processor threads. The options were as follows.

For mouse data:

```
-o tophat.out -p 8 mm9 mate_1.fq mate_2.fq
```

For K562 data:

```
-o tophat.out -p 8 --solexa1.3-quals --library-type=fr-firststrand hg19 mate_1.fq mate_2.fq
```

For simulated data:

```
-o tophat.out -p 8 --solexa1.3-quals hg19 mate_1.fq mate_2.fq
```

Bowtie version 0.12.7.0 was used for read alignment.

### 11.2 TopHat1 ann

TopHat was used as specified under 11.1 above, with the added option -G to supply a gene annotation file in GTF format.

### 11.3 TopHat2

The most recent TopHat and Bowtie versions available at the time of this study were used (2.0.3 and 2.0.0.6, respectively) with the options specified under 11.1 above.

### 11.4 TopHat2 ann

TopHat 2.0.3 and Bowite 2.0.06 were used with the options specified under 11.2 above.

## Evaluation metrics

This section discusses the metrics used to evaluate aligners in this study. Some of these metrics, or highly similar ones, have also been employed in earlier comparisons of spliced aligners<sup>4,8,9,14,15</sup>, as noted in several instances below.

### General definitions

Unless otherwise mentioned, metrics were computed on the set of primary alignments in the output from each protocol, so as not to bias the evaluation due to differences among protocols in the number of alignments reported per read.

In assessing accuracy on simulated data, we have applied the concepts of precision and recall to a range of features, including insertions, deletions, splices and transcript isoforms, as detailed below. In general terms, precision is defined as the proportion of predicted features that are correct, and recall as the proportion of actual features that are correctly predicted. Note that precision is also known as positive predictive value (PPV) and equivalent to  $1 - \text{false discovery rate (FDR)}$ . Sensitivity is an alternative term for recall. For an extensive discussion of precision and recall in the context of short read alignment, see Lindner and Friedel<sup>16</sup>.

In assessing spliced alignment performance, we distinguish between detection of *splices* in individual reads and detection of unique *splice junctions* on the genomic sequence. The latter are often supported by multiple splices depending on expression level and sequencing depth.

### Alignment yield

We measured the proportion of sequenced (or simulated) reads that were mapped and the frequency of ambiguous mappings (i.e. reads with more than one reported alignment). While a high frequency of mapped reads is desirable, this must be balanced against the risk of reporting erroneous alignments. It should also be noted that high-throughput sequencing data often contains a proportion of reads that originate from adapter or primer sequences used during library construction, and reads with error rates that preclude mapping. A good aligner would therefore be expected to report alignments for most but not all reads, when applied to high-quality output from current sequencing instruments.

Yield metrics were summarized both at the level of individual reads and read pairs (**Figs. 1** and **2a** and **Supplementary Table 3**). Alignment programs are expected to report consistently mapped pairs: if one read can be uniquely mapped, it should generally be possible to place its corresponding paired read uniquely as well (**Fig. 1**, dark blue bars).

When a read pair matches well to multiple genomic locations and a single placement cannot be selected with high confidence, an aligner may output multiple alignments for the read. In those cases, the rules of this evaluation still require that a single alignment per read be labeled as most likely (primary). This is also the practice recommended in the SAM alignment file format specification<sup>17</sup>.

It should be noted that several aligners apply strategies to place multi-mapping reads uniquely by using information from other reads (**Supplementary Note 1**), so that even if a read matches multiple locations equally well at the sequence level, it may still be possible to prioritize the correct location. An advanced alignment program would therefore be expected to produce unique mappings for most reads.

Some of the tools evaluated here reported a very high frequency of ambiguous mappings (**Fig. 1** and **Supplementary Fig. 1**). Such levels of uncertainty in the alignment output can result in suboptimal results in downstream analyses (**Supplementary Fig. 19**), where tools have difficulty choosing among the many alternative read placements. Reporting of many alignments per read can also result in very large output files, which are difficult to store and process.

### Mismatch and truncation frequencies

An aligner should be able map reads with multiple mismatches, which may represent true differences between the sequenced transcriptome and the reference genome, or constitute errors introduced during

sample preparation and sequencing. We computed the number of mismatches (substitutions) per primary read alignment and visualized the resulting distributions (**Fig. 2a** and **Supplementary Fig. 4**). Some of the alignment protocols evaluated here showed a low tolerance for mismatches. In this context, it should be noted that many programs have an option to increase the tolerance for mismatches at the expense of longer running time. However, the programs assessed here were executed with settings chosen by the developers, and the evaluated protocols should therefore correspond to best-practice workflows. All programs were run by the respective developer teams, except for TopHat, which was executed by the evaluation team according to the protocol published by the authors<sup>13</sup>.

The distribution of mismatches in alignments would be expected to follow to the base caller quality score distribution, such that a read with low mean quality score contains more mismatches relative to the genomic sequence. We observed that protocols with a low tolerance for mismatches also failed to align a large proportion of reads with low mean base call quality score (**Supplementary Fig. 2**).

A very high frequency of mismatches in the output may also be an indication of poor performance. One would typically expect few mismatches if the data is of high-quality. If a particular alignment program outputs a significantly lower number of mismatch-free mappings than others, this may indicate that suboptimal alignments are being reported.

### Truncation frequency

The frequency of mismatches in alignments should be interpreted in the context of truncation behavior (**Fig. 2**). Some aligners can truncate the ends of reads, and thus output a partial alignment when unable to map an entire sequence. This is a particularly important feature for spliced alignment programs, as a proportion of reads in any RNA-seq data set will contain splices near the read termini, such that one exon is covered only by a few bases. It is often impossible to align such read ends confidently. A good spliced aligner would therefore be expected to output a moderate proportion of truncated alignments.

### Basewise accuracy

The use of simulated data facilitates exact computation of accuracy metrics, of which basewise accuracy is the most fundamental. Here, we measured the proportion of all simulated bases that were correctly mapped, and the proportion incorrectly mapped (**Supplementary Tables 2** and **5**). Related metrics were used in the study by Grant *et al.*<sup>14</sup>. We additionally computed accuracy separately for unspliced reads and those containing splice junctions (**Supplementary Tables 6–7**). The performance on the latter group is of particular interest to this evaluation, and these reads tend to be more difficult to align. Note that when computing basewise accuracy, ambiguity in indel placement must be accounted for, as discussed in earlier work<sup>14</sup> and described in Methods.

### Read placement accuracy

In addition to basewise accuracy, it is important to measure performance at the read level. Read frequencies may be more relevant than base frequencies for several downstream applications. For example, to quantify gene expression levels it may be sufficient to assign reads to correct loci, even if some bases are incorrectly placed or alignments are truncated.

Here, we computed the proportion of simulated reads that were perfectly mapped, the proportion with a subset of bases correctly placed, and the proportion of reads that were mapped with no base correctly placed. The last category will typically consist of reads that were assigned to the wrong locus, but we noted that one program placed a substantial proportion of reads at approximately the correct location due to a programmatic error. Hence, we separately tallied reads for which the alignment overlapped the correct location, but had no base correctly placed (**Fig. 3** and **Supplementary Tables 5–7**).

### Accuracy among unique and ambiguous mappings

By comparing accuracy between unique and ambiguous mappings, a level of confidence can be established for each category (**Supplementary Table 4**). For example, if the accuracy is very low among ambiguous mappings, it may be advantageous to exclude those from downstream analyses. A good aligner should map the great majority of reads uniquely, and achieve high accuracy for the set of uniquely mapped reads.

## Indel frequency and accuracy

It is difficult to implement sensitive detection of insertions and deletions (indels) within the context of the fast search algorithms used by short read aligners<sup>3,12</sup>, and the capability to detect indels therefore differs markedly among mappers. Here, we captured these trends by counting the number of insertions and deletions in the primary alignments from each protocol. The results were expressed as indel frequencies, defined as the number of indels per thousand sequenced reads. Indel frequencies are tabulated in **Figure 4a** and **Supplementary Figure 5**, which also use bar charts to depict the size distribution of indels from each program. These distributions reveal that some protocols lack the ability to detect longer indels.

We additionally computed the accuracy of indel detection on simulated data. Precision and recall (defined above) were computed for indels of different length, thus extending the approach of Grant *et al.*<sup>14</sup>. The resulting matrices were visualized using heatmaps (**Fig. 4b**). These figures illustrate the differences in accuracy among protocols, and how this is affected by indel size.

## Spatial distribution of mismatches, indels and splices over read sequences

Depending on the search algorithms used by aligners, biases may result in the distribution of alignment features (mismatches, indels and splices) over the read sequences. We plotted these distributions, averaged over all primary alignments, for each protocol (**Supplementary Fig. 7**). The frequency of mismatches would typically be expected to increase towards the ends of reads, reflecting a concomitant decrease in sequence quality (**Supplementary Fig. 8**). This trend was not apparent for all protocols, indicating a problem with the placement of substitutions.

In contrast, gaps (indels and splices) should primarily reflect differences between the genome and transcriptome, as opposed to sequencing artifacts (for current Illumina sequencing data). The distribution of these features should therefore be roughly even over the read length. A reduction in gap frequency towards the ends of reads may reasonably be expected, as confident gap placement, particularly intron placement, can be difficult or even impossible near read termini (see the section on *Truncation frequency* above).

## Coverage of annotated genes

We explored a range of metrics reflecting how reads were placed in relation to annotated genes: number of exon hits (alignments covering only exonic features), spliced exon hits (as the previous category, but aligning with a splice operation), partial exon hits (alignments covering exonic and non-exonic features), intron hits, intergenic hits, number of genes with proper exon hits, proportion of exon hits and the number of alignments associated with specific types of features (protein-coding, pseudogene, etc.). Scatter plots were used to uncover trends in the coverage statistics. A selection of these are shown in **Supplementary Figures 9–11**. In order to aid the interpretation of the data in various plots, a trend line was plotted alongside the data points based on linear regression.

This analysis served in part to confirm that aligners behave similarly on simulated data compared to real data when high-level metrics are considered (representative behavior on simulated data was also confirmed using the more fundamental metrics described above). Additionally, we searched for cases where particular protocols constituted outliers, indicating exceptional or aberrant performance. We reasoned that trends in different coverage statistics, if consistent across many datasets, can give indirect indications about the relative performance of the methods.

For example, if a method reports more spliced alignments than others, and the remainder of the statistics show no anomalies, this is indicative of better relative performance. Of course, this interpretation is inherently subjective, as it is only valid if the reported spliced mappings are actually correct, something which cannot be established in the case of real datasets. In spite of this caveat, exploration of feature coverage statistics can provide enough insight to nominate the best performing methods. While unlikely to provide a clear-cut ranking of the methods, such conclusions are established independently from the simulation benchmarking results, and hence can reinforce them.

## Splice frequency and junction characteristics

A metric of particular interest for the evaluation of spliced aligners is the frequency of splices present in alignments. Splice frequency was defined as the number of reported splices divided by the number of sequenced reads. As an indication of whether reported splices are likely to be correct, we separated splices matching annotated introns from novel splices (**Fig. 5a**). A further dimension was added to this analysis by counting the number of alignments supporting each reported junction (**Fig. 5b**). For a well annotated genome, high rates of novel junctions supported by few read alignments indicates a significant false discovery rate. This type of analysis was also employed in the publication describing the aligner STAR<sup>8</sup>.

To further characterize the novel junctions, we distinguished four categories depending on whether the splice sites were annotated and belonged to the same gene (**Supplementary Figs. 14–15**). This revealed that different aligners tend to predict different types of novel junctions. We additionally studied the size distribution of splices on both real and simulated data (**Supplementary Fig. 13**). Unexpected shapes of those curves, such as sudden bumps or stair-like appearance, are indicative of problems with spliced alignment. The erratic nature of such trends can be confirmed by comparisons between results on real and simulated data, and by considering the true distributions produced by the simulator.

## Splice accuracy

For results on simulated data, precision and recall of splices was computed. A splice was considered correct if placed so that its genomic start and end (donor and acceptor) coordinates agreed with those of the true alignment. This analysis was carried out for all splices in primary alignments (**Fig. 5a**), as well as for the subset located between positions 20 and 57 in the 76 nt reads (**Supplementary Fig. 16**). This subset can be aligned with higher confidence due to the existence of at least 20 nt flanking sequence on each side of the splice. It is therefore of interest to see whether the relative performance of aligners differs for this group of more tractable splices. Note that these figures show FDR (1-precision) rather than precision, for consistency with the curves in **Figure 5c–e** (described below). Splice recall was further stratified based on true read coverage of corresponding junctions (**Supplementary Fig. 17**). Several aligners use information from multiple reads in same locus to place splices in individual read alignments. This can lead to a bias, such that splices are preferentially detected at high-coverage junctions. This has been investigated in a similar manner in earlier comparisons of spliced aligners<sup>4,9,15</sup>.

## Junction frequency and accuracy

Precision and recall was also computed for junction calls on the simulated data (**Supplementary Table 2**). A junction was considered correct if its genomic start and end coordinates matched those of a junction in the simulated transcriptome. The distinction between splice and junction metrics is important: a method may align the great majority of spliced reads correctly (high splice accuracy), and still distribute a small proportion of reads over many false junctions (low junction accuracy).

We noted that indeed many such false low-coverage junctions were reported. To demonstrate this behavior, we counted the number of junctions at different thresholds for the number of alignments required to call a junction. The results were visualized by plotting counts of true versus false junction calls at each threshold, yielding figures that can be interpreted in a similar manner to receiver operator characteristic (ROC) plots (**Fig. 5c–e**). Similar approaches have been used in previous aligner comparisons<sup>8,12</sup>. Here, methods with high junction accuracy can be identified by curves that are above and to the left of those of other methods.

## Transcript reconstruction accuracy

A common aim of RNA-seq studies is to identify the complete transcript isoforms present in the assayed samples. Due to the fragmentary nature of RNA-seq library construction and data acquisition, isoform reconstruction is a difficult problem. Several algorithms designed for this task have been implemented<sup>18–20</sup>, of which Cufflinks is the most widely established. To assess the suitability of alignment results for transcript reconstruction, we ran Cufflinks on the output from each alignment protocol, and computed precision and recall for reconstruction of individual exons as well as spliced transcripts (see Methods for details). As transcript reconstruction may be impossible for isoforms with low read coverage, recall was stratified by expression level for simulated data.



## Coverage of annotated genes

We assessed how RNA-seq reads were placed in relation to annotated gene structures from the Ensembl database. The results are briefly summarized in Results and some further observations are detailed here.

Relative to the frequency of exonic alignments, BAGET and SMALT mapped a high proportion of reads to intronic sequence, whereas the opposite trend was apparent for ReadsMap and to some extent the TopHat2 protocol using annotation (**Supplementary Figs. 9–11**). For BAGET and SMALT, the likely explanation is that priority is given to reads aligned in an unspliced manner to the genome. The annotation-based TopHat2 protocol takes the opposite approach – first aligning reads to the known transcriptome – and may thereby underrepresent intronic mappings. ReadsMap avoids repeat elements (**Supplementary Fig. 12**), which are prevalent in introns and represent challenging mapping targets due to the many homologous sequences present throughout the genome.

The occurrence of read alignments partially overlapping exons was also exceptionally high in the output from BAGET and SMALT. It is likely that such mappings result from failure to identify splice junctions, as suggested by a negative correlation with counts for spliced alignments at exons (**Supplementary Figs. 9–11**). TopHat2, GSNAP, GSTRUCT, STAR, MapSplice and the most conservative PALMapper protocol typically reported the fewest alignments partially overlapping exons, close to the expected result for simulated data.

For GSNAP, the performance on most gene coverage metrics was dependent upon the provision of gene annotation, while the related, more advanced GSTRUCT pipeline performed similarly with and without annotation. The same trend was apparent for STAR, where the basic (1-pass) version benefited greatly from using annotation, and the more advanced (2-pass) version behaved similarly to GSTRUCT.

## References

1. Li, H. & Durbin, R. Fast and accurate short read alignment with Burrows-Wheeler transform. *Bioinformatics* **25**, 1754–1760 (2009).
2. Marco Sola, S., Sammeth, M., Guigó, R. & Ribeca, P. The GEM mapper: fast, accurate and versatile alignment by filtration. *Nat. Methods* **9**, 1185–1188 (2012).
3. Wu, T. D. & Nacu, S. Fast and SNP-tolerant detection of complex variants and splicing in short reads. *Bioinformatics* **26**, 873–881 (2010).
4. Wang, K. *et al.* MapSplice: accurate mapping of RNA-seq reads for splice junction discovery. *Nucleic Acids Res.* **38**, e178 (2010).
5. Jean, G., Kahles, A., Sreedharan, V. T., De Bona, F. & Rätsch, G. RNA-Seq read alignments with PALMapper. *Curr Protoc Bioinformatics* **32**, 11.6.1–11.6.37 (2010).
6. De Bona, F., Ossowski, S., Schneeberger, K. & Rätsch, G. Optimal spliced alignments of short sequence reads. *Bioinformatics* **24**, i174–80 (2008).
7. Campagna, D. *et al.* PASS: a program to align short sequences. *Bioinformatics* **25**, 967–968 (2009).
8. Dobin, A. *et al.* STAR: ultrafast universal RNA-seq aligner. *Bioinformatics* **29**, 15–21 (2013).
9. Trapnell, C., Pachter, L. & Salzberg, S. L. TopHat: discovering splice junctions with RNA-Seq. *Bioinformatics* **25**, 1105–1111 (2009).
10. Kim, D. *et al.* TopHat2: accurate alignment of transcriptomes in the presence of insertions, deletions and gene fusions. *Genome Biol.* **14**, R36 (2013).
11. Langmead, B., Trapnell, C., Pop, M. & Salzberg, S. L. Ultrafast and memory-efficient alignment of short DNA sequences to the human genome. *Genome Biol.* **10**, R25 (2009).
12. Langmead, B. & Salzberg, S. L. Fast gapped-read alignment with Bowtie 2. *Nat. Methods* **9**, 357–359 (2012).
13. Trapnell, C. *et al.* Differential gene and transcript expression analysis of RNA-seq experiments with TopHat and Cufflinks. *Nat Protoc* **7**, 562–578 (2012).
14. Grant, G. R. *et al.* Comparative analysis of RNA-Seq alignment algorithms and the RNA-Seq unified mapper (RUM). *Bioinformatics* **27**, 2518–2528 (2011).
15. Bonfert, T., Csaba, G., Zimmer, R. & Friedel, C. C. A context-based approach to identify the most likely mapping for RNA-seq experiments. *BMC Bioinformatics* **13 Suppl 6**, S9 (2012).
16. Lindner, R. & Friedel, C. C. A comprehensive evaluation of alignment algorithms in the context of RNA-seq. *PLoS ONE* **7**, e52403 (2012).

17. Li, H. *et al.* The Sequence Alignment/Map format and SAMtools. *Bioinformatics* **25**, 2078–2079 (2009).
18. Trapnell, C. *et al.* Transcript assembly and quantification by RNA-Seq reveals unannotated transcripts and isoform switching during cell differentiation. *Nat. Biotechnol.* **28**, 511–515 (2010).
19. Li, J. J., Jiang, C.-R., Brown, J. B., Huang, H. & Bickel, P. J. Sparse linear modeling of next-generation mRNA sequencing (RNA-Seq) data for isoform discovery and abundance estimation. *Proc. Natl. Acad. Sci. U.S.A.* **108**, 19867–19872 (2011).
20. Mezlini, A. M. *et al.* iReckon: Simultaneous isoform discovery and abundance estimation from RNA-seq data. *Genome Res.* **23**, 519–529 (2013).
